# Supplementary material for: Peptide barcoding for establishment of new types of genotype–phenotype linkages
Source: PubMed Central journal article supplement (PMC6478338; doi:10.1371/journal.pone.0215993), 2019-04-23

# Anti-CD4-FLAG (9681 bp)

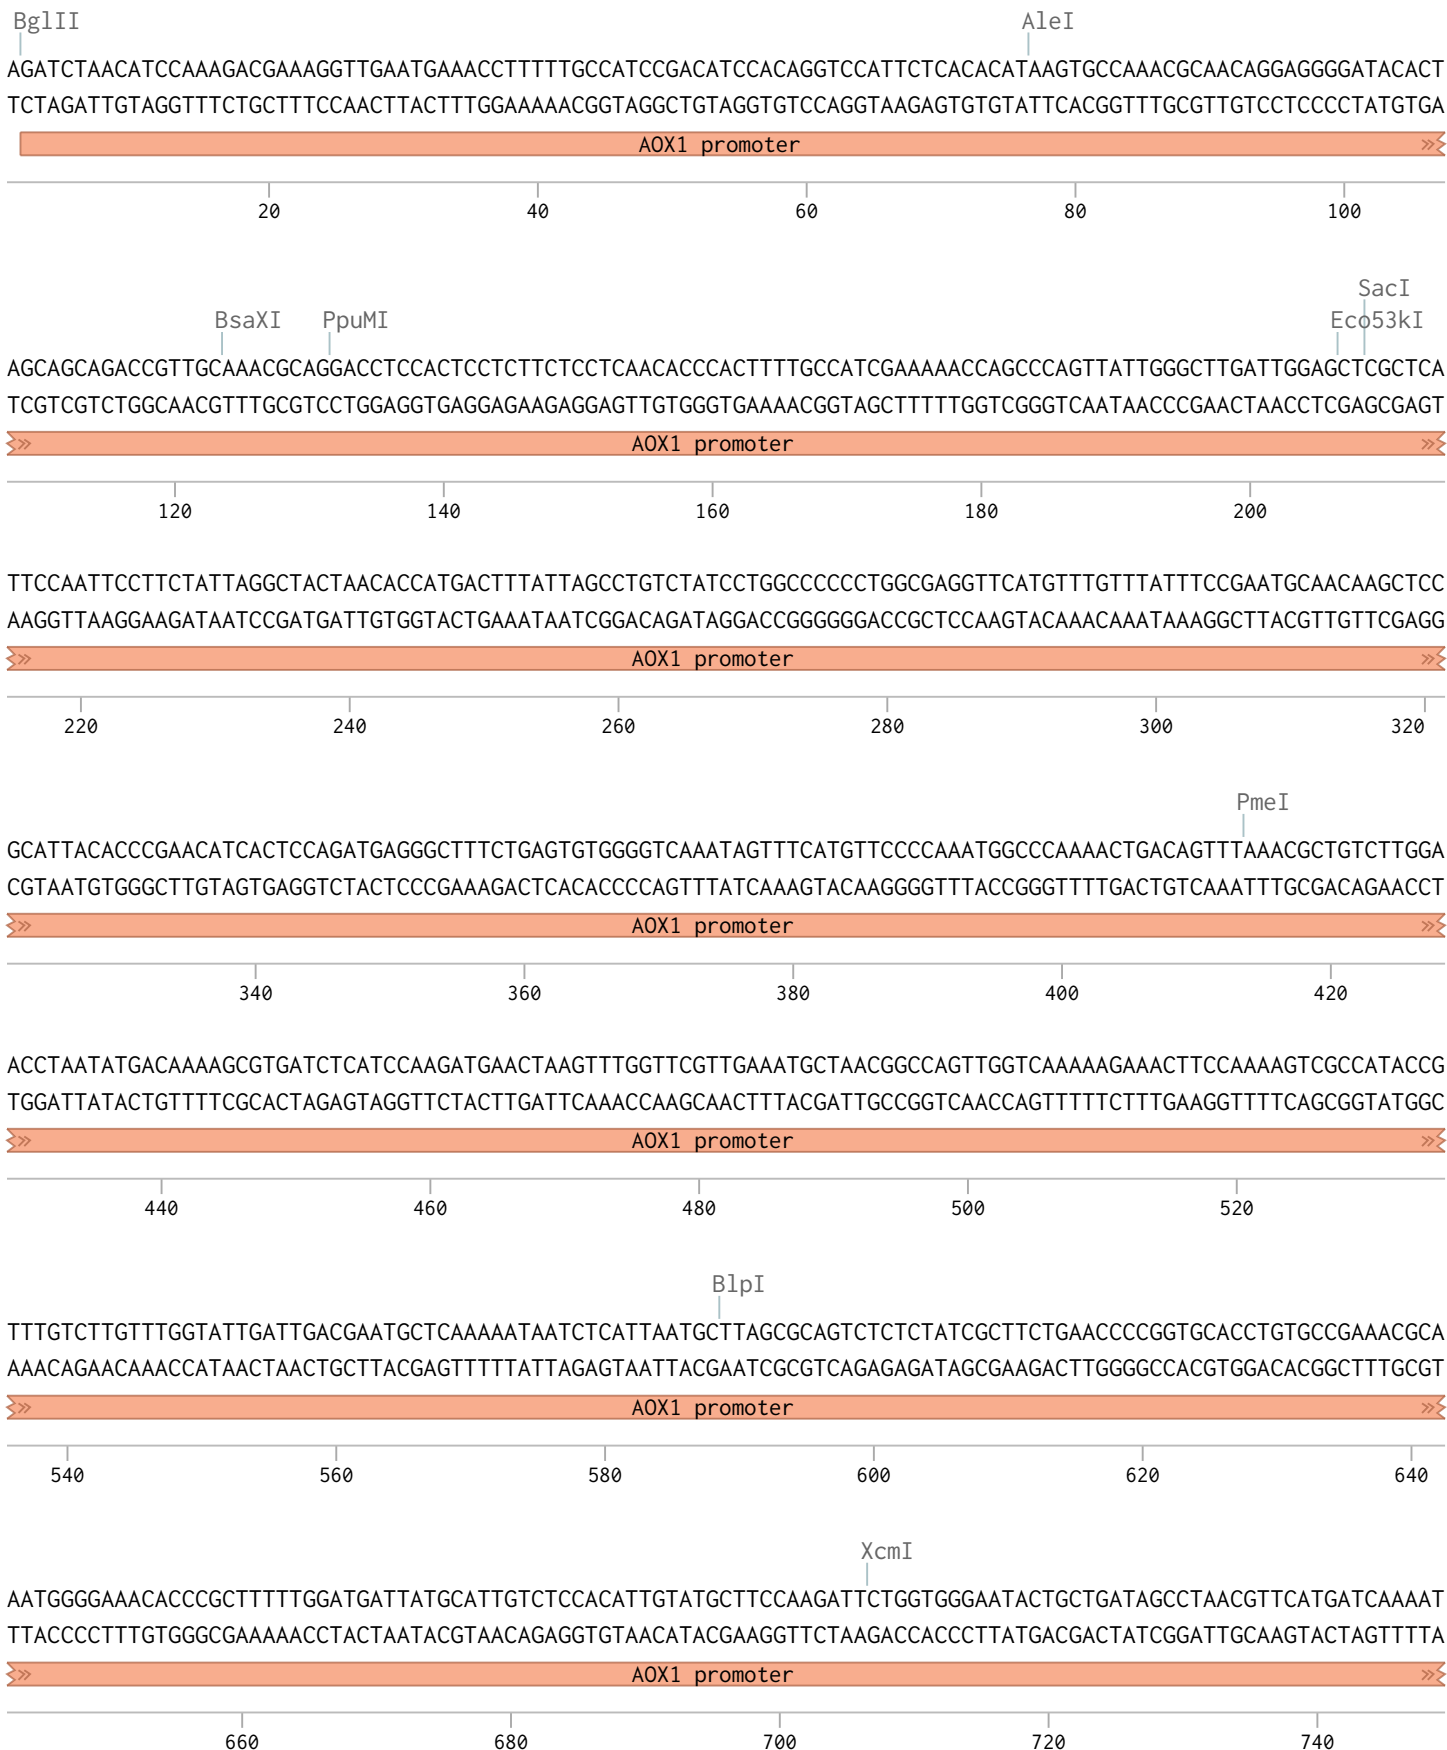

TAACTGTTCTAACCCCTACTTGACAGCAATATATAAACAGAAGGAAGCTGCCCTGTCTTAAACCTTTTTTTTATCATCATTATTAGCTTACTTTTCATAATTGCGA  
AATTGACAAGATTGGGGATGAACTGTCGTTATATATTTGTCTTCCTCGACGGGACAGAAATTTGGAAAAAAAAATAGTAGTAATAATCGAATGAAAGTATTAACGCT

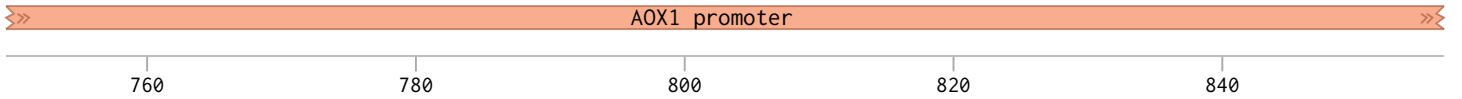

CTGGTTCCAATTGACAAGCTTTTGGATTTTAAACGACTTTTAAACGACAACCTTGAGAAGATCAAAAAACAATAATTATTGGAAGGATCCAACGATGAGATTTCTTCA  
GACCAAGGTTAACTGTTGAAAACTAAAATTGCTGAAAATTGCTGTTGAACTCTCTAGTTTTTTGTTGATTAATAAGCTTCTAGGTTTGCTACTCTAAAGGAAGT

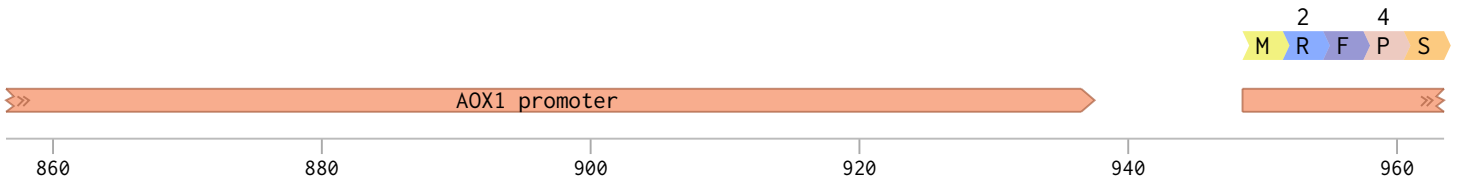

ATTTTACTGCAGTTTTATTTCGCAGCATCTCCGCATTAGCTGCTCCAGTCAACACTACAACAGAAGATGAAACGGCACAAATCCGGCTGAAGCTGTCATCGGTTA  
TAAAAATGACGTCAAAATAAGCGTCGTAGGAGCGTAATCGACGAGGTCAGTTGTGATGTTGTCTTCTACTTTGCCGTGTTAAGGCCGACTTCGACAGTAGCCAAT

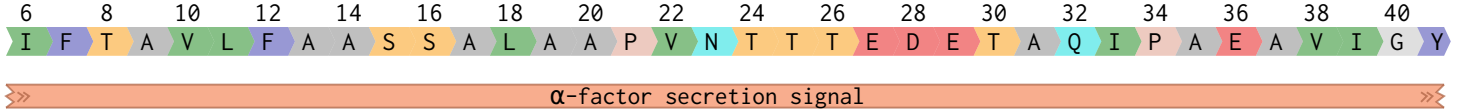

CTCAGATTTAGAAGGGGATTTTCGATGTTGCTGTTTTGCCATTTTCCAACAGCACAAAATAACGGGTTATTGTTTATAAATACTACTATTGCCAGCATTGCTGCTAAAG  
GAGTCTAAATCTTCCCTAAAGCTACAACGACAAAACGGTAAAAGGTTGTCGTTTATTGCCAATAACAAATATTTATGATGATAACGGTCTGTAACGACGATTTTC

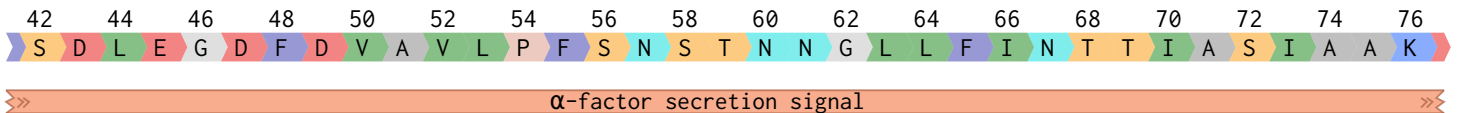

AAGAAGGGTATCTCTCGAGAAAAGAGAGGCTGAAGCTTACGTAGAATTCGAAGTTCAGTTAGTTGAATCTGGTGGTGGCTCTGTCCAACCTGGTGGTTCTCTTACT  
TTCTTCCCATAGAGAGCTTTTTCTCTCCGACTTCGAATGCATCTTAAGCTTCAAGTCAATCAACTTAGACCACCACCGAGACAGGTTGGACCACCAAGAGAATGA

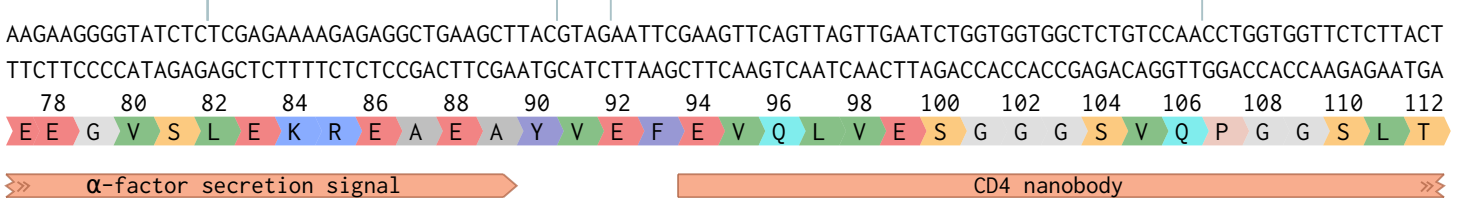

TTGCTGTGGTACTCCGGTAGAACCTTCAACGTTATGGGATGGTTCAGACAAGCTCCTGAAAGGAACGTGAGTTTGTGCTGCTGTTAGTGGTCTTCTACTGG  
AACAGGACACCATGAAGCCATCTTGAAGTTGCAATACCTACCAAGTCTGTTTCGAGGACCTTCTTGCCTCAACAGCGACGACAATCCACCAGAAGATGACC

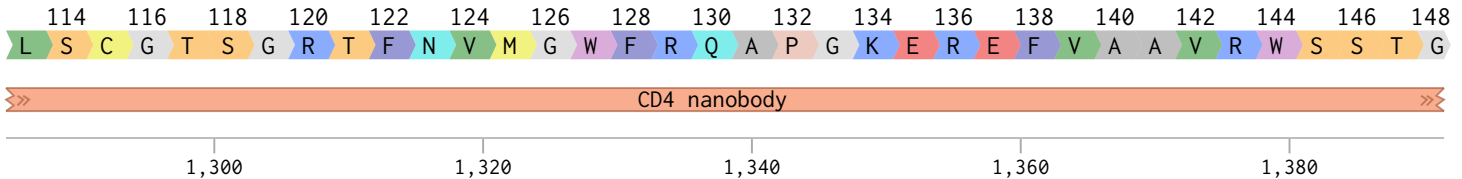

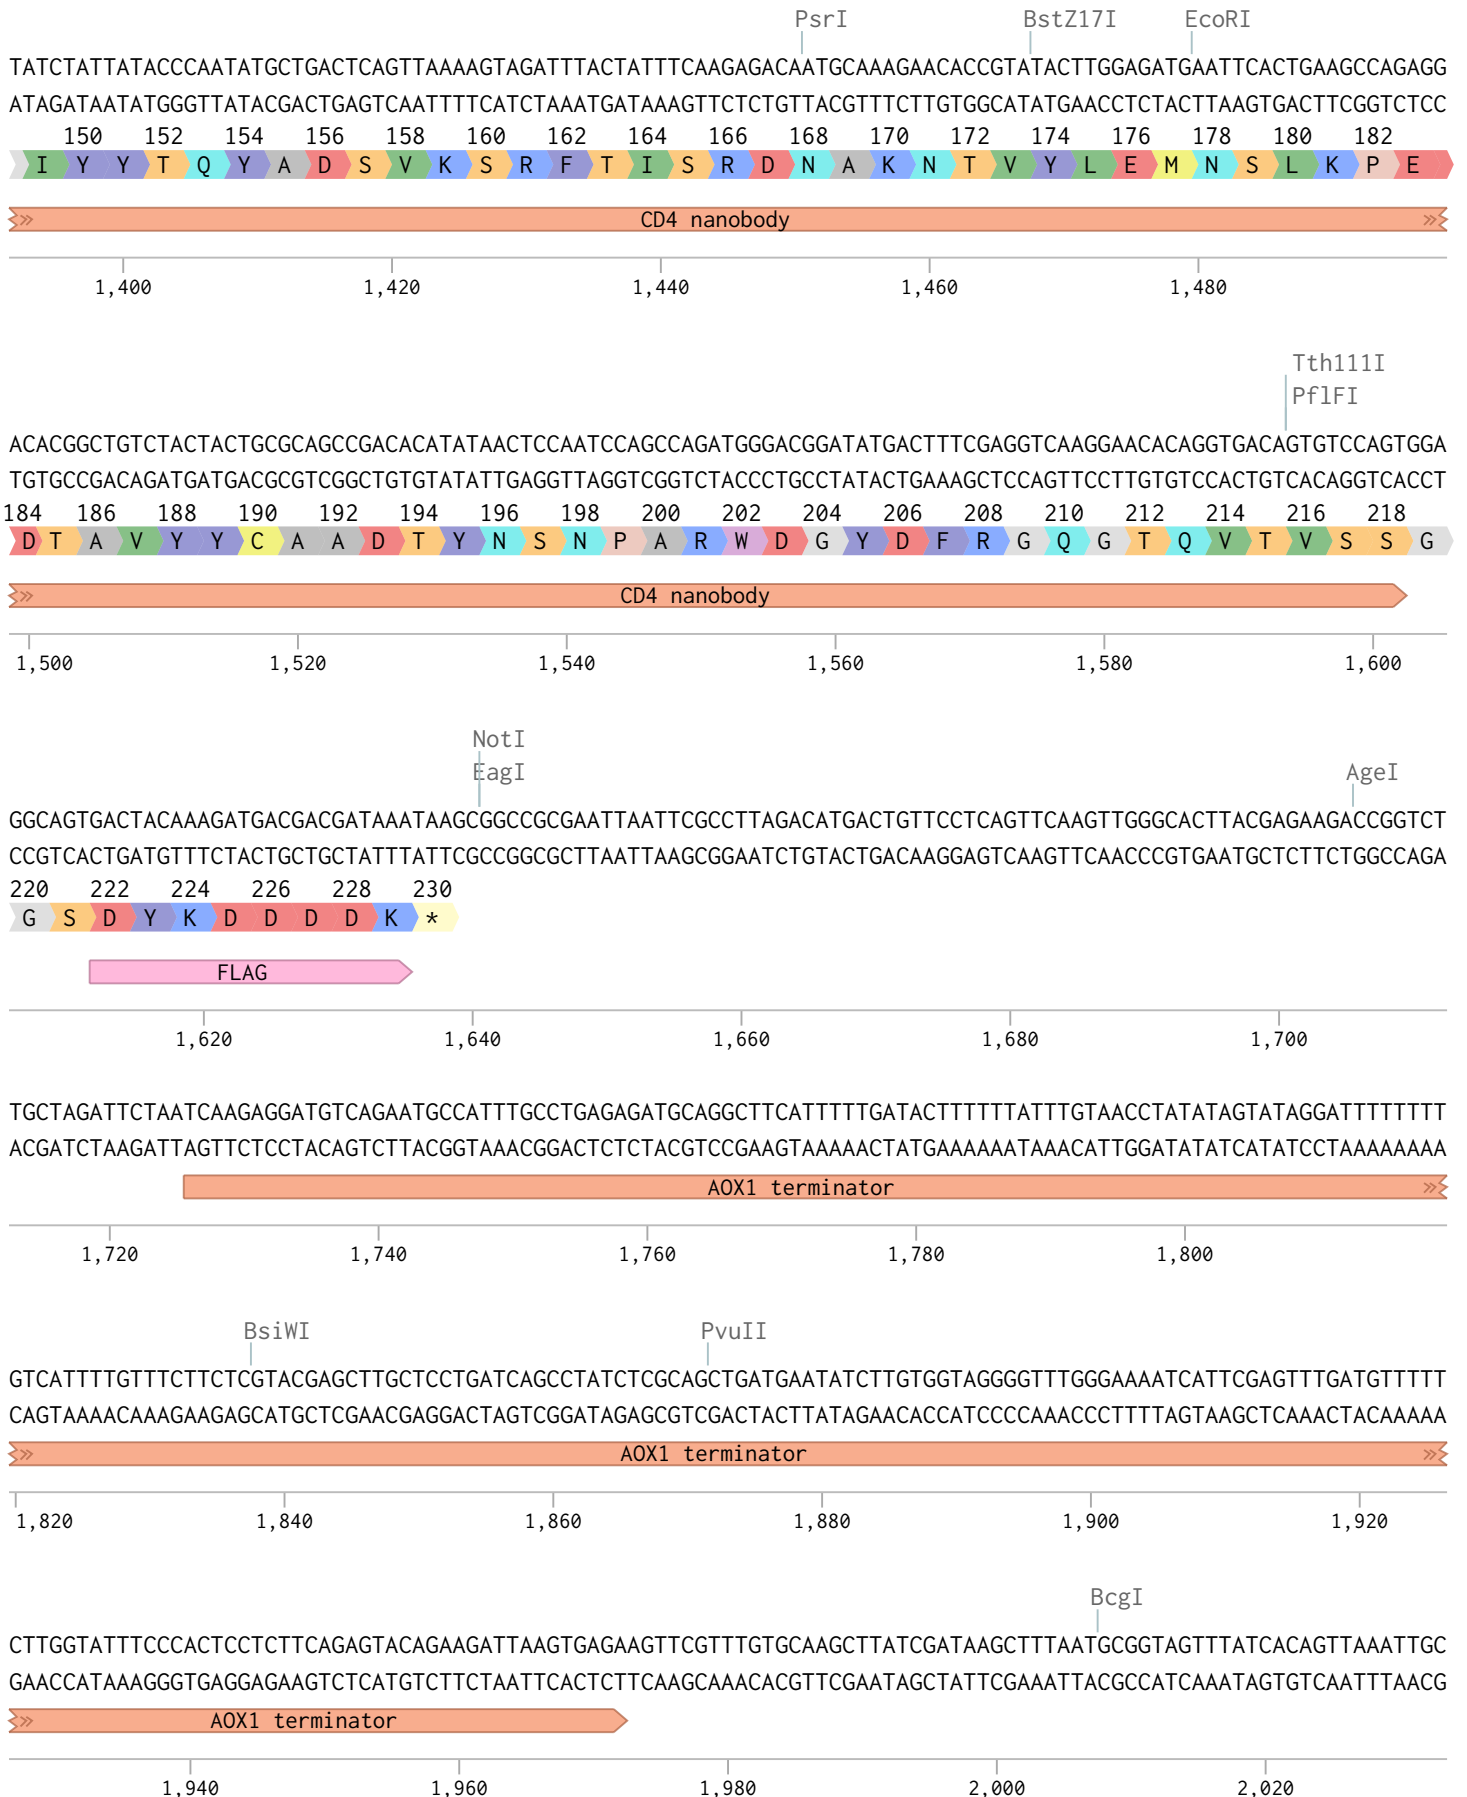

TAACGCAGTCAGGCACCGTGTATGAAATCTAACAAATGCGCTCATCGTCATCCTCGGCACCGTCACCCTGGATGCTGTAGGCATAGGCTTGGTTATGCCGGTACTGCC  
ATTGCGTCAGTCCGTGGCACATACTTTAGATTGTTACGCGAGTAGCAGTAGGAGCCGTGGCAGTGGGACCTACGACATCCGATCCGAACCAATACGGCCATGACGG

2,040 2,060 2,080 2,100 2,120 2,140

EcoRV BtgZI AfeI BmtI NheI FspAI  
GGGCTCTTGCGGGATATCGTCCATTCGACAGCATCGCCAGTCACTATGGCGTGCTGCTAGCGCTATATGCGTTGATGCAATTTCTATGCGCACCCGTTCTCGGAG  
CCCGGAGAACGCCCTATAGCAGGTAAGGCTGTCGTAGCGGTCAGTGATACCGCACGACGATCGCGATATACGCAACTACGTTAAAGATACGCGTGGCAAGAGCCTC

2,160 2,180 2,200 2,220 2,240

CACTGTCCGACCGCTTTGGCCGCCGCCAGTCTGCTCGTTCGCTACTTGGAGCCACTATCGACTACGCGATCATGGCGACCACCCGTCCTGTGGATCTATCGA  
GTGACAGGCTGGCGAAACCGCGCGGGTCAGGACGAGCGAAGCGATGAACCTCGGTGATAGCTGATGCGCTAGTACCCTGGTGTGGCAGGACACCTAGATAGCT

2,260 2,280 2,300 2,320 2,340

XbaI  
ATCTAAATGTAAGTAAAACTCTAAATAATTAATAAGTCCCAGTTTCTCCATACGAACCTTAACAGCATTGCGGTGAGCATCTAGACCTTCAACAGCAGCCAGAT  
TAGATTTACATTCAATTTTAGAGATTTATTAATTTATTCAGGGTCAAAGAGGTATGCTTGAATTGTCGTAACGCCACTCGTAGATCTGGAAGTTGTCGTCGGTCTA

2,360 2,380 2,400 2,420 2,440 2,460

MscI Bsu36I HpaI  
CCATCACTGCTTGGCCAATATGTTTCAGTCCCTCAGGAGTACGTCTGTGAAGTGATGAACTTCTGGAAGTTGCAGTGTTAACTCCGCTGTATTGACGGGCATAT  
GGTAGTGACGAACCGTTATACAAAGTCAGGGAGTCTCAATGCAGAACACTTCACTACTGAAGACCTTCCAACGTCACAATTGAGGGCAGATAACTGCCCGTATA

2,480 2,500 2,520 2,540 2,560

BsiWI KpnI Acc65I  
CCGTACGTTGGCAAAGTGTGGTTGGTACCAGGAGGTAATCTCCACAACCTCTCTGGAGAGTAGGCACCAACAACACAGATCCAGCGTGTGTACTTGATCAACATA  
GGCATGCAACCGTTTACACCAACCATGGCCTCCTCATTAGAGGTGTTGAGAGACCTCTCATCCGTGGTTGTTTGTGTCTAGGTCGACAACATGAACTAGTTGTAT

2,580 2,600 2,620 2,640 2,660

AloI  
AGAAGAAGCATTCTCGATTGTCAGGATCAAGTGTTCAGGAGCGTACTGATTGGACATTTCAAAGCCTGCTCGTAGGTTGCAACCGATAGGGTTGTAGAGTGTGCAA  
TCTTCTCGTAAGAGCTAAACGTCCTAGTTTACAAGTCTCGCATGACTAACCTGTAAGGTTTCGGACGAGCATCCAACGTTGGCTATCCCAACATCTCACAGTT

2,680 2,700 2,720 2,740 2,760 2,780

BsgI  
TACACTTGCGTACAATTTCAACCCCTGGCAACTGCACAGCTTGGTTGTGAACAGCATCTTCAATTCTGGCAAGCTCCTTGTCTGTCATATCGACAGCCAACAGAATC  
ATGTGAACGCATGTTAAAGTTGGGAACCGTTGACGTGTCGAACCAACACTTGTGCTAGAAGTTAAGACCGTTGAGGAAACAGACAGTATAGCTGTCGGTTGTCTTAG

2,800 2,820 2,840 2,860 2,880

ACCTGGGAATCAATACCATGTTTCAAGTGTGAGACAGAAGTCTGAGGCAACGAAATCTGGATCAGCGTATTTATCAGCAATAACTAGAACTCAGAAGGCCAGCAGG  
TGGACCCCTAGTTATGGTACAAGTCAAGTCTGTCTCCAGACTCCGTTGCTTTAGACCTAGTCGCATAAATAGTCGTTATTGATCTTGAAGTCTTCCGGGTCGTTCC

2,900 2,920 2,940 2,960 2,980

CATGTCAATACTACACAGGGCTGATGTGTCATTTTGAACCATCATCTTGGCAGCAGTAACGAAGTGGTTTCCTGGACCAAATATTTTGTACACCTTAGGAACAGTTT  
GTACAGTTATGATGTGTCCCGACTACACAGTAAACTTGGTAGTAGAACCGTCGTCATTGCTTGACCAAAGGACCTGGTTTATAAAACAGTGTGAATCCTTGTCAAA

3,000 3,020 3,040 3,060 3,080 3,100

BmtI  
NheI  
KpnI  
Acc65I  
CTGTTCCGTAAGCCATAGCAGCTACTGCCTGGGCGCCTCCTGCTAGCACGATACACTTAGCACCAACCTTGTGGCAACGTAGATGACTTCTGGGGTAAGGGTACCA  
GACAAGGCATTCCGGTATCGTCGATGACGGACCCGCGGAGGACGATCGTGCTATGTGAATCGTGGTTGGAACACCCGTTGCATCTACTGAAGACCCCAATCCCATGGT

3,120 3,140 3,160 3,180 3,200

TCCTTCTTAGGTGGAGATGCAAAAACAATTTCTTTGCAACCAGCAACTTTGGCAGGAACACCCAGCATCAGGGAAGTGAAGGCAGAATTGCGGTTCCACCAGGAAT  
AGGAAGAATCCACCTCTACGTTTTTGTAAAGAAACGTTGGTGGTAAACCGTCCTTGTGGTTCGATGCCCTTACCTTCCGCTTAAACCCAAGGTGGTCTTAA

3,220 3,240 3,260 3,280 3,300

ATAGAGGCCAACTTTCTCAATAGGTCTTGCAAAACGAGAGCAGACTACACCAGGGCAAGTCTCAACTTGCAACGTCTCCGTTAGTTGAGCTTCATGGAATTTCTGA  
TATCTCCGTTGAAAGAGTTATCCAGAACGTTTTGCTCTCGTCTGATGTGGTCCCGTTTCCAGATTGAACGTTGCAGAGGCAATCAACTCGAAGTACCTTAAAGGACT

3,320 3,340 3,360 3,380 3,400 3,420

CGTTATCTATAGAGAGATCAATGGCTCTCTTAAAGTTATCTGGCAATTGCATAAGTTCCTCTGGGAAAGGAGCTTCTAACACAGGTGTCTTCAAAGCGACTCCATCA  
GCAATAGATATCTCTAGTTACCGAGAGAATTGCAATAGACCGTTAACGTATTCAAGGAGACCCTTTCCTCGAAGATTGTGTCCACAGAAGTTTCGCTGAGGTAGT

3,440 3,460 3,480 3,500 3,520

SalI  
AACTTGGCAGTTAGTTCTAAAAGGGCTTTGTACCATTTTGACGAACATTGTCGACAATTGGTTTGACTAATCCATAATCTGTTCCGTTTTCTGGATAGGACGAGC  
TTGAACCGTCAATCAAGATTTTCCGAAACAGTGGTAAACTGCTTGTAAACAGCTGTTAACCAAAGTATTAAGGATTAGACAAGGCAAAAGACCTATCCTGCTGC

3,540 3,560 3,580 3,600 3,620

StuI  
AAGGGCATCTTCAATTTCTTGTGAGGAGGCCTTAGAAAACGTCAATTTGCACAATTCAATACGACCTTCAGAAGGGACTTCTTTAGGTTTGGATTCTTTTAGGTT  
TTCCCGTAGAAGTTAAAGAACACTCCTCCGGAATCTTGCAGTTAAAACGTGTTAAGTTATGCTGGAAGTCTCCCTGAAGAAATCCAAACCTAAGAAGAAATCCAA

3,640 3,660 3,680 3,700 3,720 3,740

GTTCTTGGTGTATCCTGGCTTGGCATCTCCTTCTTCTAGTGACCTTTAGGACTTCATATCCAGGTTTCTCTCCACCTCGTCCAACGTACACCGTACTTGGCA  
CAAGGAACCATAGGACCGAACCGTAGAGGAAAGGAGATCACTGGAATTCCTGAAGTATAGGTTCCAAGAGAGGTGGAGCAGGTTGCAGTGTGGCATGAACCGT

3,760 3,780 3,800 3,820 3,840

CATCTAACTAATGCAAAATAAAATAAGTCAGCACATTCCCAGGCTATATCTTCTTGGATTTAGCTTCTGCAAGTTCATCAGCTTCTCCCTAATTTTAGCGTTCAA  
GTAGATTGATTACGTTTTATTTTATTTCAGTCTGTAAAGGTCGGATATAGAAGGAACCTAAATCGAAGACGTTCAAGTAGTCAAGGAGGGATTAAATCGCAAGTT

3,860 3,880 3,900 3,920 3,940

DraIII NcoI MscI  
CAAACTTCGTCGTCAAATAACCGTTTGGTATAAGAACCTTCTGGAGCATTGCTTACGATCCACAAGGTGGCTTCCATGGCTTAAGACCCCTTTGATTGGCCAA  
GTTTTGAAGCAGCAGTTTATTGGCAAACCATATCTTGAAGACCTCGTAACGAGAATGCTAGGGTGTCCACCGAAGTACCGAGATTCTGGGAACTAACCCGGTT

3,960 3,980 4,000 4,020 4,040 4,060

AACAGGAAGTGC GTTCCAAGTGACAGAAACCAACACCTGTTTGTTC AACCACAAATTTCAAGCAGTCTCCATCACAATCCAATTCGATACCCAGCAACTTTTGAGTT  
TTGTCCTTCACGCAAGGTTCACTGTCTTTGGTTGTGGACAAACAAGTTGGTGTTTAAAGTTTCGTCAGAGGTAGTGTTAGGTTAAGCTATGGGTCGTTGAAAAC TAA

4,080

4,100

4,120

4,140

4,160

BspEI

GCTCCAGATGTAGCACCTTTATACCACAAACCGTGACGACGAGATTGGTAGACTCCAGTTTGTGTCCTTATAGCCTCCGGAATAGACTTTTTGGACGAGTACACCAG  
CGAGGTCTACATCGTGGAAATATGGTGTTTGGCACTGCTGCTAACCATCTGAGGTCAAACACAGGAATATCGGAGGCCTTATCTGAAAAACCTGCTCATGTGGTC

4,180

4,200

4,220

4,240

4,260

4,280

GCCCAACGAGTAATTAGAAGAGTCAGCCACCAAAGTAGTGAATAGACCATCGGGGCGGTCAAGTAGTCAAAGACGCCAACAAAATTTCACTGACAGGGAAC TTTTGA  
CGGGTTGCTCATAATCTTCTCAGTCGGTGGTTTCATCACTTATCTGGTAGCCCCGCCAGTCATCAGTTTCTGCGGTTGTTTTAAAGTGACTGTCCCTTGAAAAAC T

4,300

4,320

4,340

4,360

4,380

CATCTTCAGAAAGTTCGTATTCAGTAGTCAATTGCCGAGCATCAATAATGGGGATTATACCAGAAGCAACAGTGGAAGTCACATCTACCAACTTTGCGGTCTCAGAA  
GTAGAAGTCTTTCAAGCATAAGTCATCAGTTAACGGCTCGTAGTTATTACCCCTAATATGGTCTTCGTTGTACCTTCAGTGTAGATGGTTGAAACGCCAGAGTCTT

4,400

4,420

4,440

4,460

4,480

AAAGCATAAACAGTTCTACTACCGCCATTAGTAAAAC TTTTCAAATCGCCAGTGGAGAAGAAAAAGGCACAGCGATACTAGCATTAGCGGGCAAGGATGCAACTTT  
TTTCGTATTTGTCAAGATGATGGCGGTAATCACTTTGAAAAGTTTAGCGGGTCACCTCTCTTTTTCCGTGTCGCTATGATCGTAATCGCCCGTTCTACGTTGAAA

4,500

4,520

4,540

4,560

4,580

4,600

PpuMI

BsrGI

ATCAACCAGGGTCTATAGATAAACCTAGCGCCTGGGATCATCCTTTGGACAAC TCTTTCTGCCAAATCTAGGTCCAAAATCACTTCATTGATACCATTATTGTACA  
TAGTTGGTCCAGGATATCTATTGGGATCGCGGACCCTAGTAGGAAACCTGTTGAGAAAGACGGTTTAGATCCAGGTTTTAGTGAAGTAACTATGGTAATAACATGT

4,620

4,640

4,660

4,680

4,700

ACTTGAGCAAGTTGTCGATCAGCTCCTCAAATGGTCTCTGTAACGGATGACTCAACTTGCACATTAAC TTTGAAGCTCAGTCGATTGAGTGAAC TTTGATCAGGTTG  
TGAAC TCGTTCAACAGCTAGTCGAGGAGTTTAAACCAGGAGACATTGCCTACTGAGTTGAACGTGTAATTGAAC TTTCCAGTCAGCTAACTCACTTGAAC TAGTCCAAC

4,720

4,740

4,760

4,780

4,800

PvuII

BsgI

TGCAGCTGGTCAGCAGCATAGGAAACACGGCTTTTCTACCAAAC TCAAGGAATTATCAAAC TCTGCAACACTTTCGATGTCAGGTAGCAAGGAAATGTCATACT  
ACGTCGACCAGTCGTCGATCCCTTTGTGCCGAAAAGGATGGTTTGTAGTTCCCTTAATAGTTTGTAGACGTTGTGAACGCATACGTCATCGTTCCCTTTACAGTATGA

4,820

4,840

4,860

4,880

4,900

4,920

TGAAGTCGGACAGTGAGTGTAGTCTTGAGAAAT TCTGAAGCCGATTTTTATTATCAGTGAGTCAGTCATCAGGAGATCCTCTACGCCGACGCATCGTGCCGACC  
ACTTCAGCCTGTCACTCACATCAGAACTTTAAGACTTCCGCATAAAAAATAAGTCACTCAGTCAGTAGTCTCTAGGAGATGCGGCCTGCGTAGCACCGGCTGG

4,940

4,960

4,980

5,000

5,020

SbfI

Bpu10I

BbvCI

StuI

TGCAGGGGGGGGGGGCGCTGAGGTCTGCCTCGTGAAGAAGGTGTTGCTGACTCATACCAGGCCTGAATCGCCCCATCATCCAGCCAGAAAGTGAGGGAGCCACGG  
ACGTC CCCCCCCCCCGGACTCCAGACGGAGCACTTCTCCACAACGACTGAGTATGGTCCGGACTTAGCGGGGTAGTAGGTCGGTCTTTCACTCCCTCGGTGCC

5,040

5,060

5,080

5,100

5,120

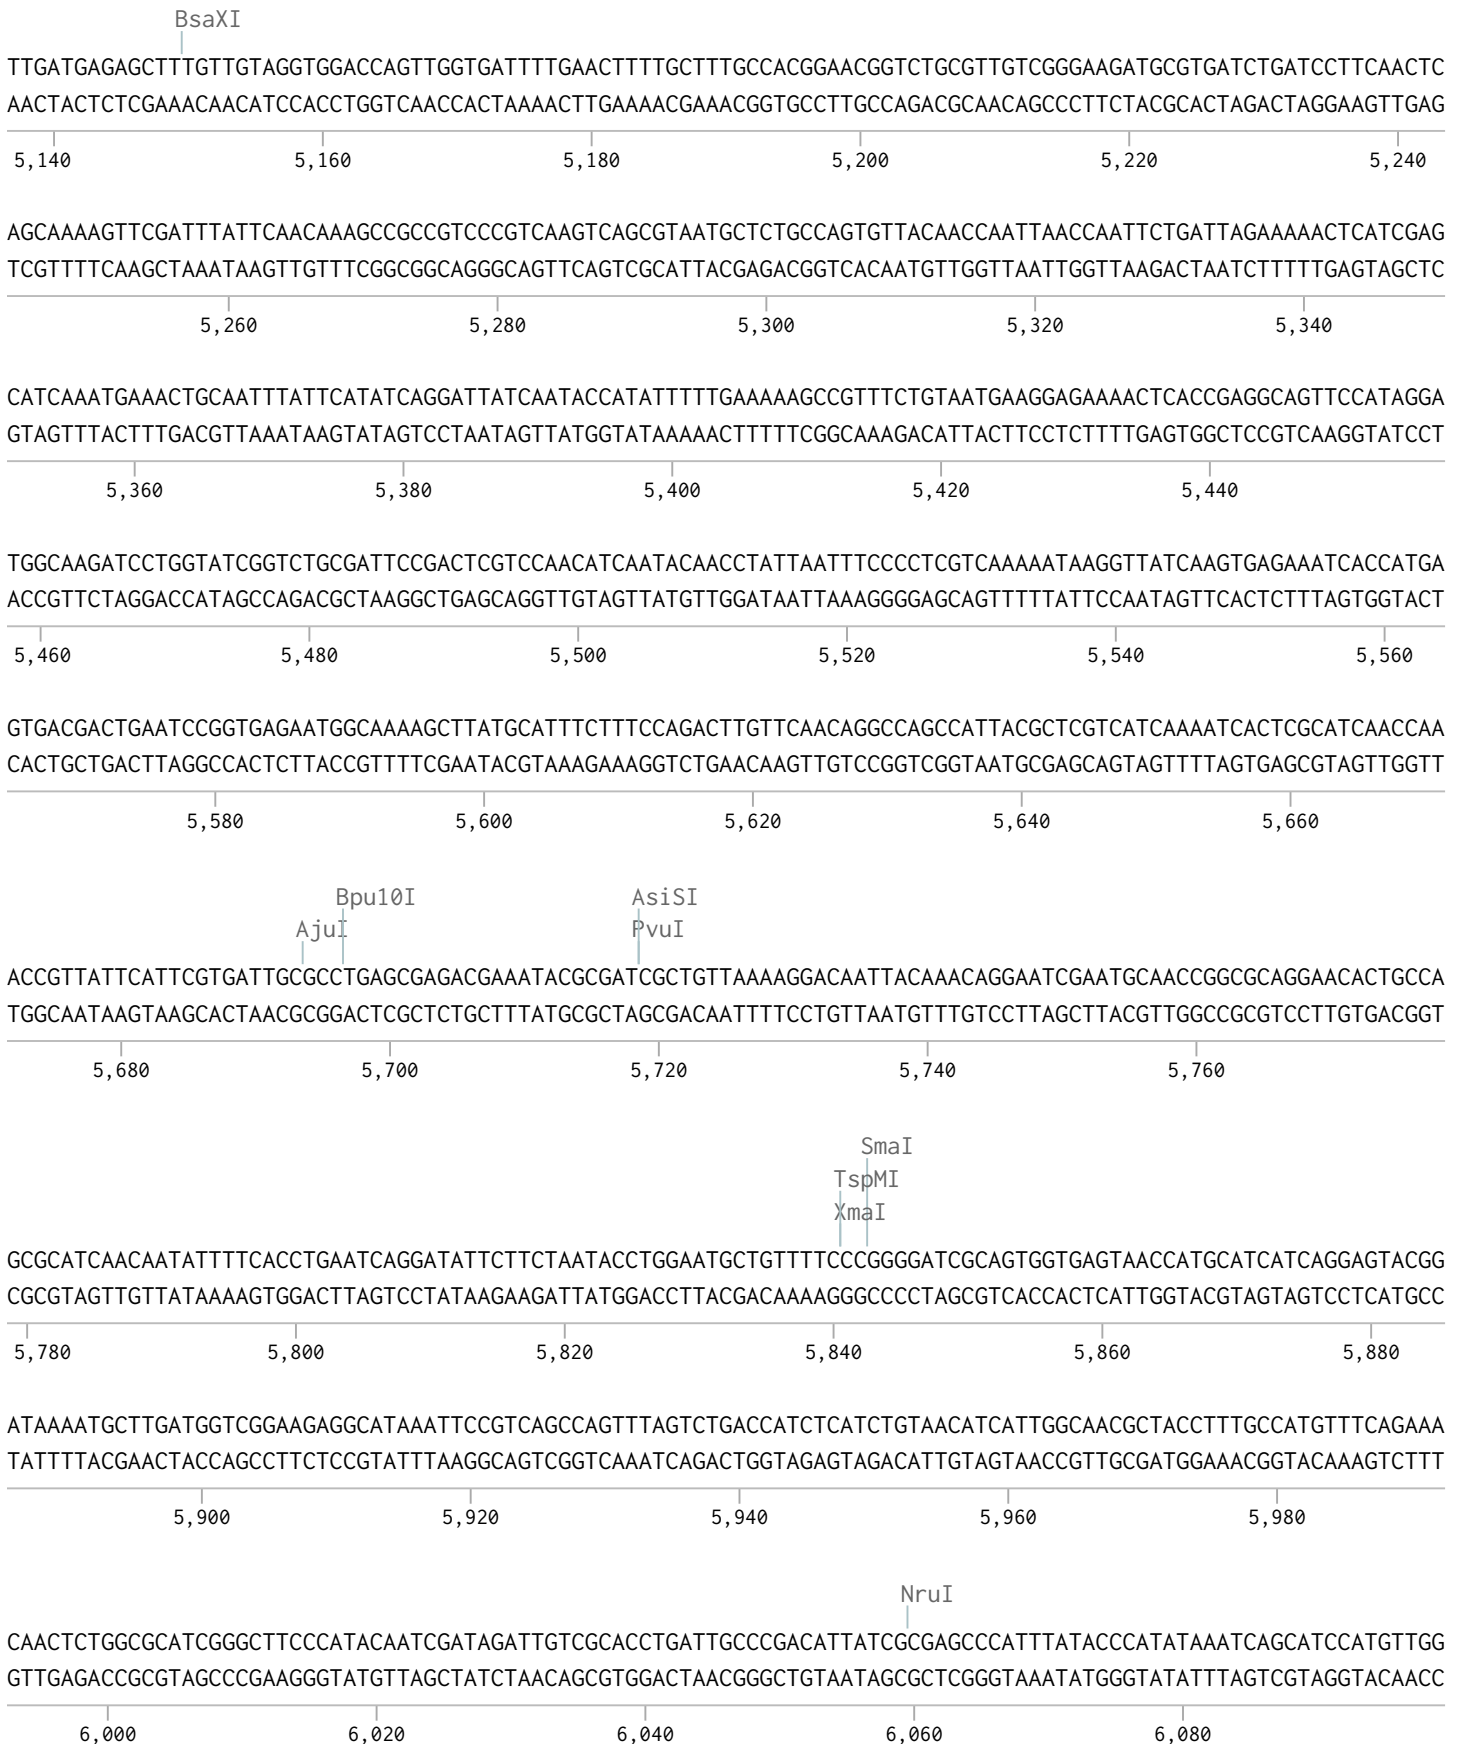

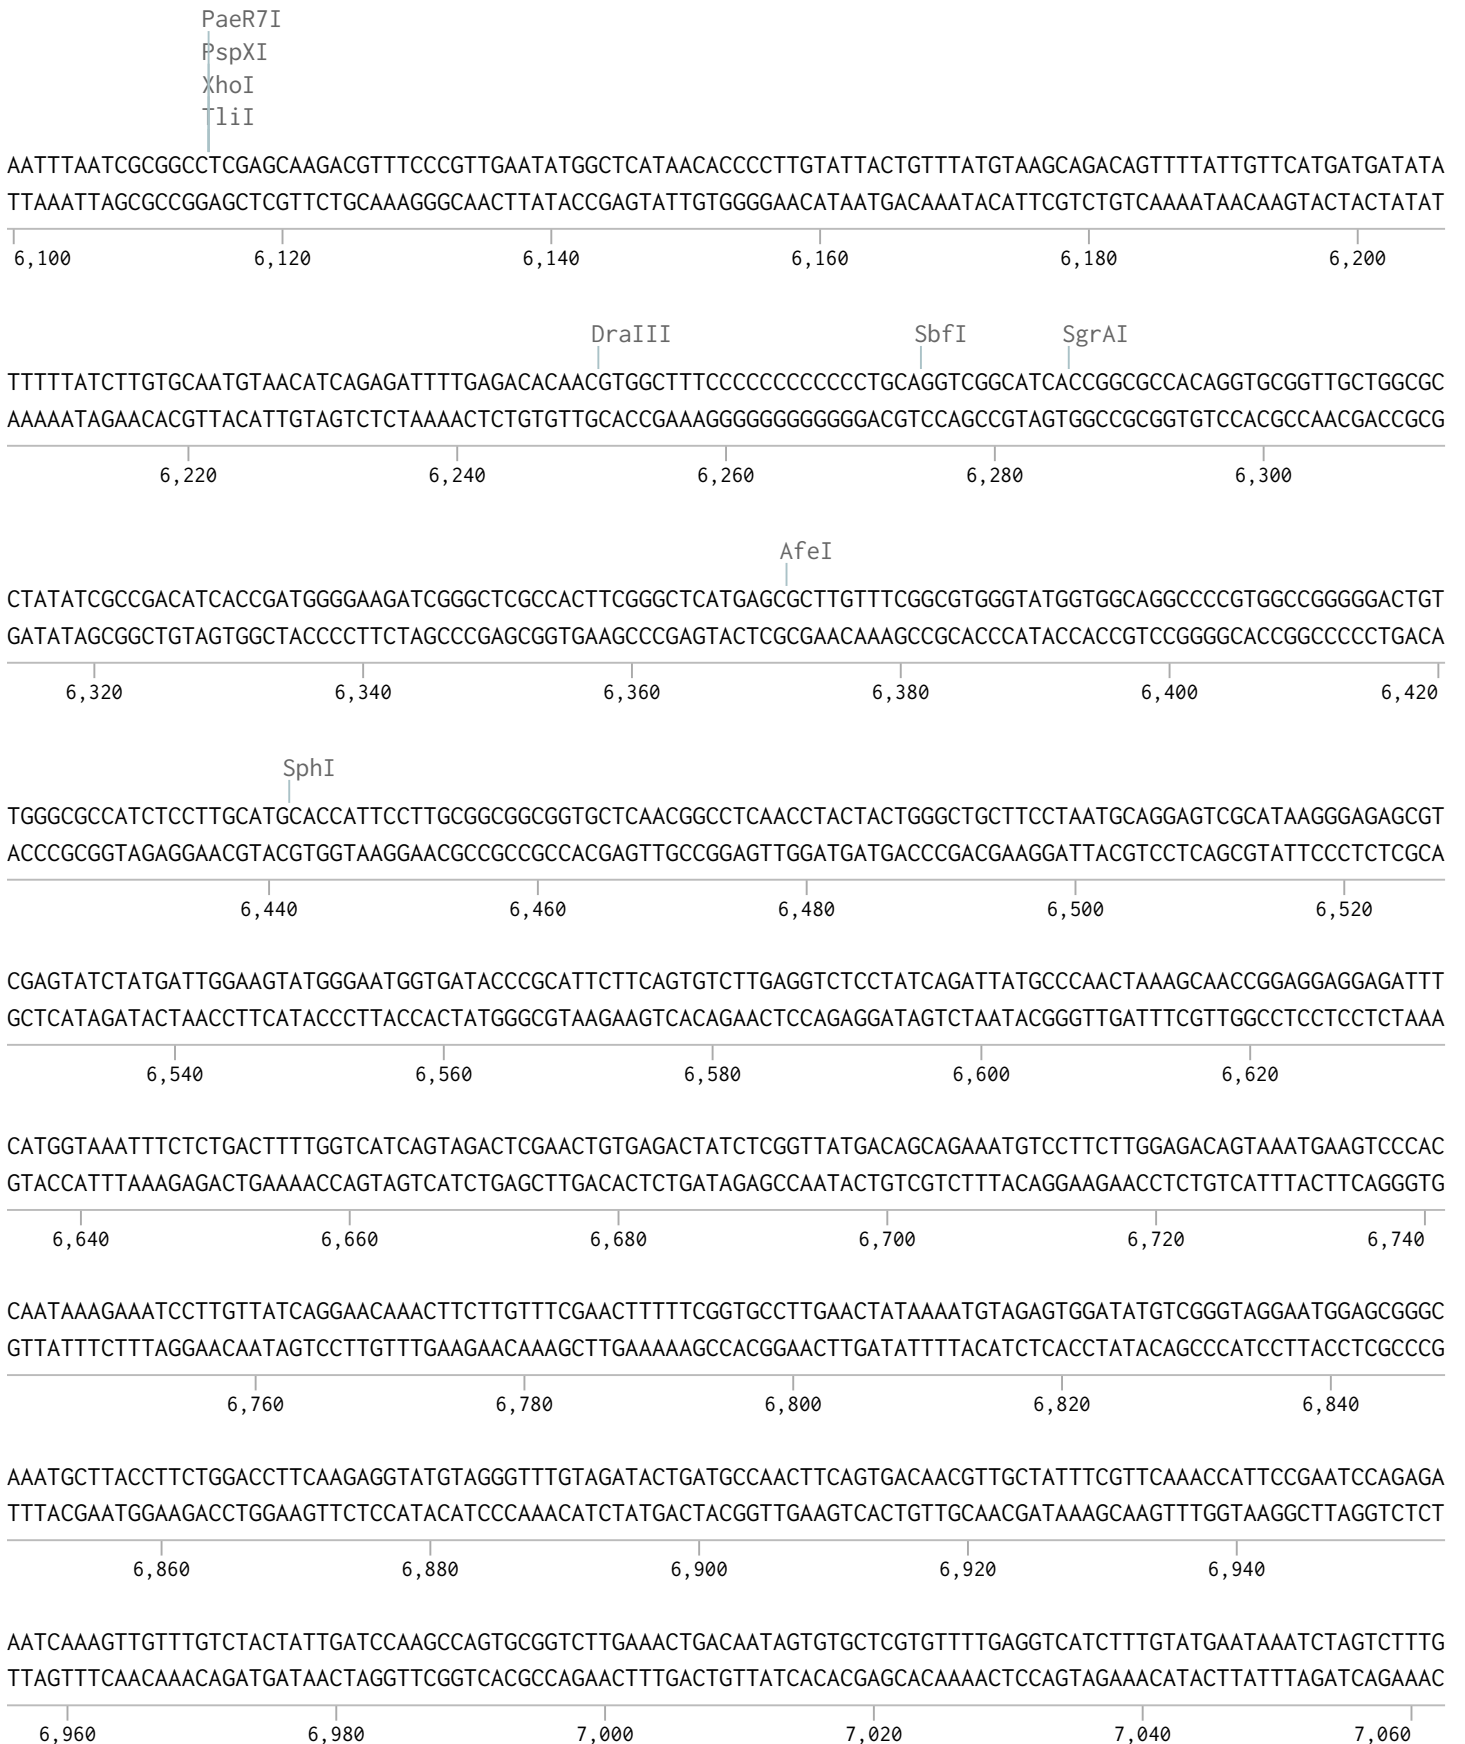



ATCTAAATAATCTTGACGAGCCAAGGCGATAAATACCCAAATCTAAAACCTCTTTTAAAACGTTAAAAGGACAAGTATGTCTGCCTGTATTAACCCCAAATCAGCTC  
TAGATTTATTAGAACTGCTCGGTTCCGCTATTTATGGGTTTAGATTTTGGAGAAAATTTGCAATTTTCTGTTCATACAGACGGACATAATTTGGGGTTTAGTCGAG

7,080 7,100 7,120 7,140 7,160

EcoRV

GTAGTCTGATCCTCATCAACTTGAGGGCACTATCTTGTTTTAGAGAAAATTTGCGGAGATGCGATATCGAGAAAAAGGTACGCTGATTTTAAACGTGAAATTTATCT  
CATCAGACTAGGAGTAGTTGAACTCCCGTGATAGAACAAAATCTCTTTAAACGCCTCTACGCTATAGCTCTTTTCCATGCGACTAAAATTTGCACTTTAAATAGA

7,180 7,200 7,220 7,240 7,260

BglII

CAAGATCTCTGCCTCGCGGTTTCGGTGATGACGGTGAAAACCTCTGACACATGCAGCTCCCGGAGACGGTCACAGCTTGTCTGTAAGCGGATGCCGGGAGCAGACA  
GTTCTAGAGACGGAGCGCGAAAGCCACTACTGCCACTTTTGGAGACTGTGTACGTCGAGGGCCTCTGCCAGTGTGCAACAGACATTCCGCTACGGCCCTCGTCTGT

7,280 7,300 7,320 7,340 7,360 7,380

Tth111I

PflFI

BsaAI

BstZ17I

AGCCCGTCAGGGCGCGTCAGCGGGTGTGGCGGGTGTGGGGCGCAGCCATGACCCAGTCACGTAGCGATAGCGGAGTGTATACTGGCTTAACTATGCGGCATCAGA  
TCGGGCAGTCCCGCGCAGTCGCCACAACCGCCACAGCCCGCGTCCGTTACTGGGTCAGTGCATCGCTATCGCCTCACATATGACCGAATTGATACGCCGTAGTCT

7,400 7,420 7,440 7,460 7,480

NdeI

BspQI

SapI

GCAGATTGTAAGTGCACCATATGCGGTGTGAAATACCGCACAGATGCGTAAGGAGAAAATACCGCATCAGGCGCTTCCGCTTCCGCTCACTGACTCGC  
CGTCTAACATGACTCTCACGTGGTATACGCCACACTTTATGGCGTGTCTACGCATTCTCTTTTATGGCGTAGTCCCGGAGAAGGCGAAGGAGCGAGTGACTGAGCG

7,500 7,520 7,540 7,560 7,580

AflIII

PciI

TGCCTCGGTCGTTCCGCTGCGGCGAGCGGTATCAGCTCACTCAAAGCGGTAATACGGTTATCCACAGAATCAGGGGATAACGCAGGAAAGAATGTGAGCAAAA  
ACGCGAGCCAGCAAGCCGACGCCGCTCGCCATAGTCGAGTGAGTTCCGCCATTATGCCAATAGGTGCTTAGTCCCCTATTGCGTCTTTCTGTACTCTGTTTT

7,600 7,620 7,640 7,660 7,680 7,700

GGCCAGCAAAAGGCCAGGAACCGTAAAAAGGCCGCGTGTGGCGTTTTTCCATAGGCTCCGCCCCCTGACGAGCATCACAAAATCGACGCTCAAGTCAGAGGTG  
CCGGTCGTTTTCCGCTCCTTGGCATTTCGCGCAACGACCGCAAAAAGGTATCCGAGGCGGGGGACTGCTCGTAGTGTTTTTAGCTGCGAGTTCAGTCTCCAC

ColE1 origin

7,720 7,740 7,760 7,780 7,800

GCGAAACCCGACAGGACTATAAAGATACCAGGCGTTCCCCCTGGAAGCTCCCTCGTGCCTCTCTGTCCGACCCTGCCGCTTACCGGATACCTGTCCGCCTTTC  
CGTTTTGGGCTGTCTGATTTCTATGGTCCGCAAAAGGGGACCTTCGAGGAGCACGCGAGAGACAAGGCTGGGACGGCGAATGGCCTATGGACAGGCGGAAAG

ColE1 origin

7,820 7,840 7,860 7,880 7,900

TCCCTTCGGGAAGCGTGGCGCTTTCTCAATGCTCACGCTGTAGGTATCTCAGTTCGGTGTAGGTCGTTTCGCTCCAAGCTGGGCTGTGTGCACGAACCCCCGTTTCAG  
AGGGAAGCCCTTCGCACCGCAAAGAGTTACGAGTGCACATCCATAGAGTCAAGCCACATCCAGCAAGCGAGGTTTCGACCCGACACAGTCTGGGGGGCAAGTC

ColE1 origin

7,920 7,940 7,960 7,980 8,000 8,020

CCCGACCGCTGCGCCTTATCCGGTAACTATCGTCTTGAGTCCAACCCGGTAAGACACGACTTATCGCCACTGGCAGCAGCCACTGGTAACAGGATTAGCAGAGCGAG  
GGGCTGGCGACGCGGAATAGGCCATTGATAGCAGAACTCAGGTTGGGCCATTCTGTGCTGAATAGCGGTGACCGTCGTCGGTGACCATTGCCTAATCGTCTCGCTC

ColE1 origin

8,040 8,060 8,080 8,100 8,120

GTATGTAGGCGGTGCTACAGAGTCTTGAAGTGGTGGCCTAACTACGGCTACACTAGAAGGACAGTATTTGGTATCTGCGCTCTGCTGAAGCCAGTTACCTTCGGAA  
CATACTCCGCCACGATGTCTCAAGAACTTACCACCGGATTGATGCCGATGTGATCTTCTGTCAAAACCATAGACGCGAGACGACTTCGGTCAATGGAAGCCTT

ColE1 origin

8,140 8,160 8,180 8,200 8,220

AAAGATTGGTAGCTCTTGATCCGGCAAACAAACCACCGCTGGTAGCGGTGGTTTTTTTTGTTTGAAGCAGCAGATTACGCGCAGAAAAAAGGATCTCAAGAAGAT  
TTTCTCAACCATCGAGAAGTCCGCGTTTGGTGGCGACCATGCCACCAAAAAACAAACGTTTCGTCGCTAATGCGCGTCTTTTTTCTAGAGTTCTTCTA

ColE1 origin

8,240 8,260 8,280 8,300 8,320 8,340

CCTTTGATCTTTTCTACGGGCTGACGCTCAGTGAACGAAAACCTCACGTTAAGGGATTTGGTCATGAGATTATCAAAAAGGATCTTACCTAGATCCTTTTAAA  
GGAACTAGAAAAGATGCCCCAGACTGCGAGTCACTTGTCTTTGAGTGCAATCCCTAAAACAGTACTCTAATAGTTTTTCTAGAAGTGGATCTAGGAAAATTT

ColE1 origin

8,360 8,380 8,400 8,420 8,440

TTAAAAATGAAGTTTTAAATCAATCTAAAGTATATATGAGTAACTTGGTCTGACAGTTACCAATGCTTAATCAGTGAGGCACCTATCTCAGCGATCTGTCTATTTT  
AATTTTTACTTCAAAATTTAGTTAGATTTTCAATATACTCAATTTGAACCAGACTGTCAATGGTTACGAATTAGTCACTCCGTGGATAGAGTCGCTAGACAGATAAAG

AmpR

8,460 8,480 8,500 8,520 8,540 8,560

GTTATCCATAGTTGCCTGACTCCCCGTCGTGTAGATAACTACGATACGGGAGGGCTTACCATCTGGCCCCAGTGTGCAATGATACCGGAGACCCAGCTCACCG  
CAAGTAGGTATCAACGGACTGAGGGGCAGCACATCTATTGATGCTATGCCCTCCCGAATGGTAGACCGGGTACGACGTTACTATGGCGCTCTGGGTGCGAGTGGC

AmpR

8,580 8,600 8,620 8,640 8,660

GCTCCAGATTTATCAGCAATAAACCAGCCAGCCGAAGGGCCGAGCGCAGAAGTGGTCTGCAACTTTATCCGCTCCATCCAGTCTATTAATTGTTGCCGGGAAGC  
CGAGGTCTAAATAGTCGTTATTTGGTTCGGTTCGGCCTTCCCGCTCGCTTCCACCAGGACGTTGAAATAGGCGGAGGTAGGTCAGATAATTAACAACGGCCCTTCG

AmpR

8,680 8,700 8,720 8,740 8,760

TAGAGTAAGTAGTTCGCCAGTTAATAGTTTGCGCAACGTTGTTGCCATTGCTGCAGGCATCGTGGTGTACAGCTCGTCGTTTGGTATGGCTTCATTACGCTCCGGTT  
ATCTCATTCAAGCGGTCAATTATCAAACGCGTTGCAACAACGTTAACGACGTCCGTAGCACCACAGTGCAGCAGCAAACCATACCGAAGTAAGTCGAGGCCAA

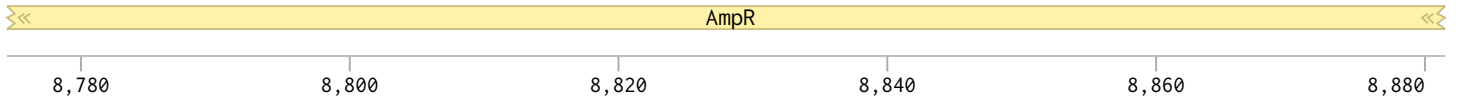

CCCAACGATCAAGGCGAGTTACATGATCCCCATGTTGTGCAAAAAAGCGGTTAGCTCCTTCGGTCTCCGATCGTTGTGCAAGTAAGTTGGCCGAGTGTATCA  
GGGTTGCTAGTTCGCTCAATGTACTAGGGGTACAACACGTTTTTTCGCCAATCGAGGAAGCCAGGAGGCTAGCAACAGTCTTCATTCAACCGCGTCACAATAGT

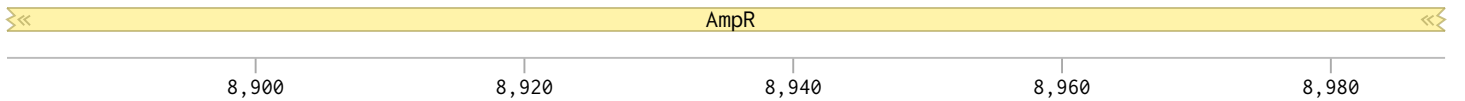

CTCATGGTTATGGCAGCACTGCATAATTCTTACTGTCATGCCATCCGTAAGATGCTTTTCTGTGACTGGTGGTACTCAACCAAGTCATTCTGAGAATAGTGTAT  
GAGTACCAATACCGTCGTGACGTATTAAGAGAATGACAGTACGGTAGGCATTCTACGAAAAGACACTGACCCTCATGAGTTGGTTCAGTAAGACTCTTATCACATA

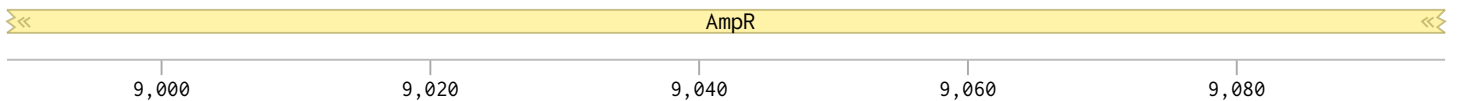

GCGGCGACCGAGTTGCTCTTGCCCGCGTCAACACGGGATAATACCGCGCCACATAGCAGAACTTTAAAAGTGCTCATCTGGAAAACGTTCTTCGGGGCGAAAAC  
CGCCGCTGGCTCAACGAGAACGGCGCAGTTGTGCCCTATTATGGCGCGGTGATCGTCTTGAATTTTACAGAGTAGTAACCTTTTGAAGAAGCCCGCTTTTG

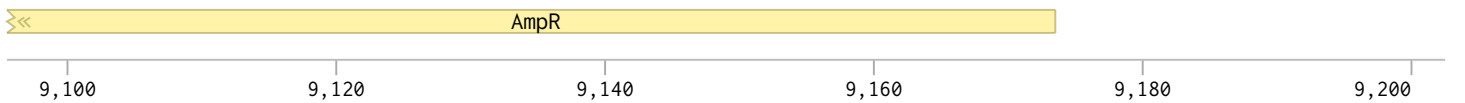

TCTCAAGGATCTTACCGCTGTTGAGATCCAGTTCGATGTAACCCACTCGTGCACCCAAGTATCTTCAGCATCTTTTACTTTTACCAGCGTTTCTGGGTGAGCAAAA  
AGAGTTTCTAGAATGGCGACAACCTTAGGTCAAGCTACATTGGGTGAGCACGTGGGTTGACTAGAAAGTCGTAGAAAATGAAAAGTGGTCGAAAAGACCCACTCGTTTT

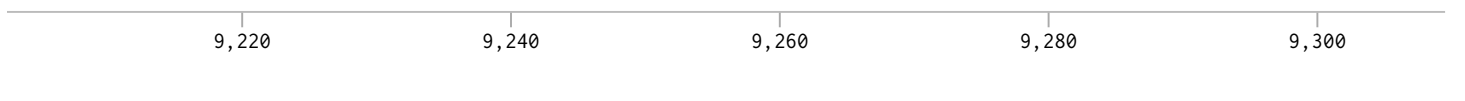

ACAGGAAGGCAAAATGCCGCAAAAAAGGGAATAAGGGCGACACGAAAATGTTGAATACTCATACTCTTCTTTTCAATATTATTGAAGCATTATCAGGGTTATTG  
TGCTTCCGTTTTACGGGTTTTTCCCTTATTCCCGCTGTGCCTTTACAACCTATGAGTATGAGAAGGAAAAAGTTATAATAACTTCGTAATAGTCCCAATAAC

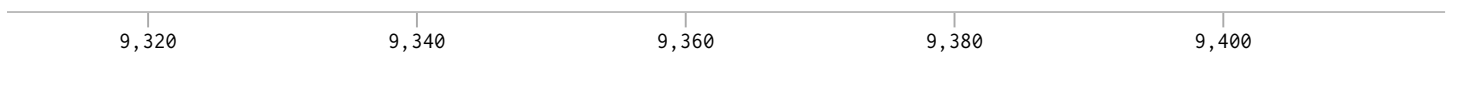

TCTCATGAGCGGATACATATTTGAATGTATTTAGAAAAATAACAATAGGGGTTCCGCGCACATTTCCCGAAAAGTGCCACCTGACGTCTAAGAAACCATTATTA  
AGAGTACTCGCTATGTATAAACTTACATAAATCTTTTATTTGTTTATCCCCAAGGCGCGTGTAAAGGGGCTTTTACGGTGGACTGCAGATTCTTTGGTAATAAT

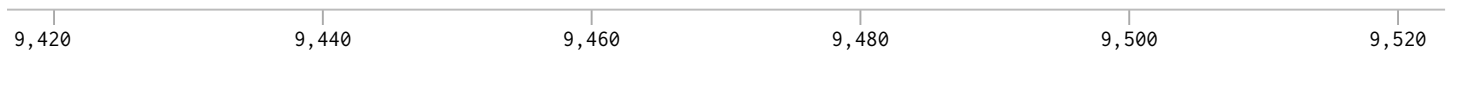

TCATGACATTAACCTATAAAAAAGGCGTATCACGAGGCCCTTTCGCTTCAAGAATTAATTCTCATGTTTGACAGCTTATCATCGATAAGCTGACTCATGTTGGTA  
AGTACTGTAATTGGATATTTTTATCCGCATAGTGTCCGGAAAGCAGAAGTCTTAATTAAGAGTACAACTGTGCAATAGTAGCTATTTCGACTGAGTACAACCAT

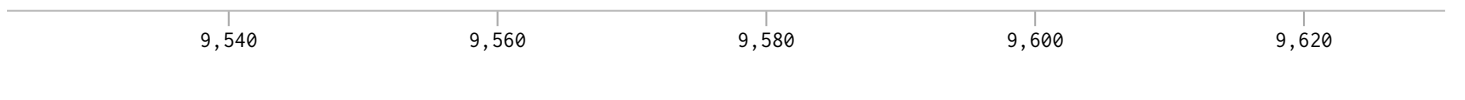

TTGTGAAATAGACGCGATCGGGAACACTGAAAAATAACAGTTATTATTCCG  
AACACTTTATCTGCGTCTAGCCCTTGTGACTTTTTATTGTCAATAATAAGC

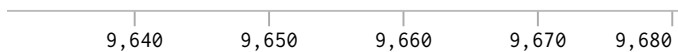

# Anti-CD4-FLAG-Barcode1 (9723 bp)

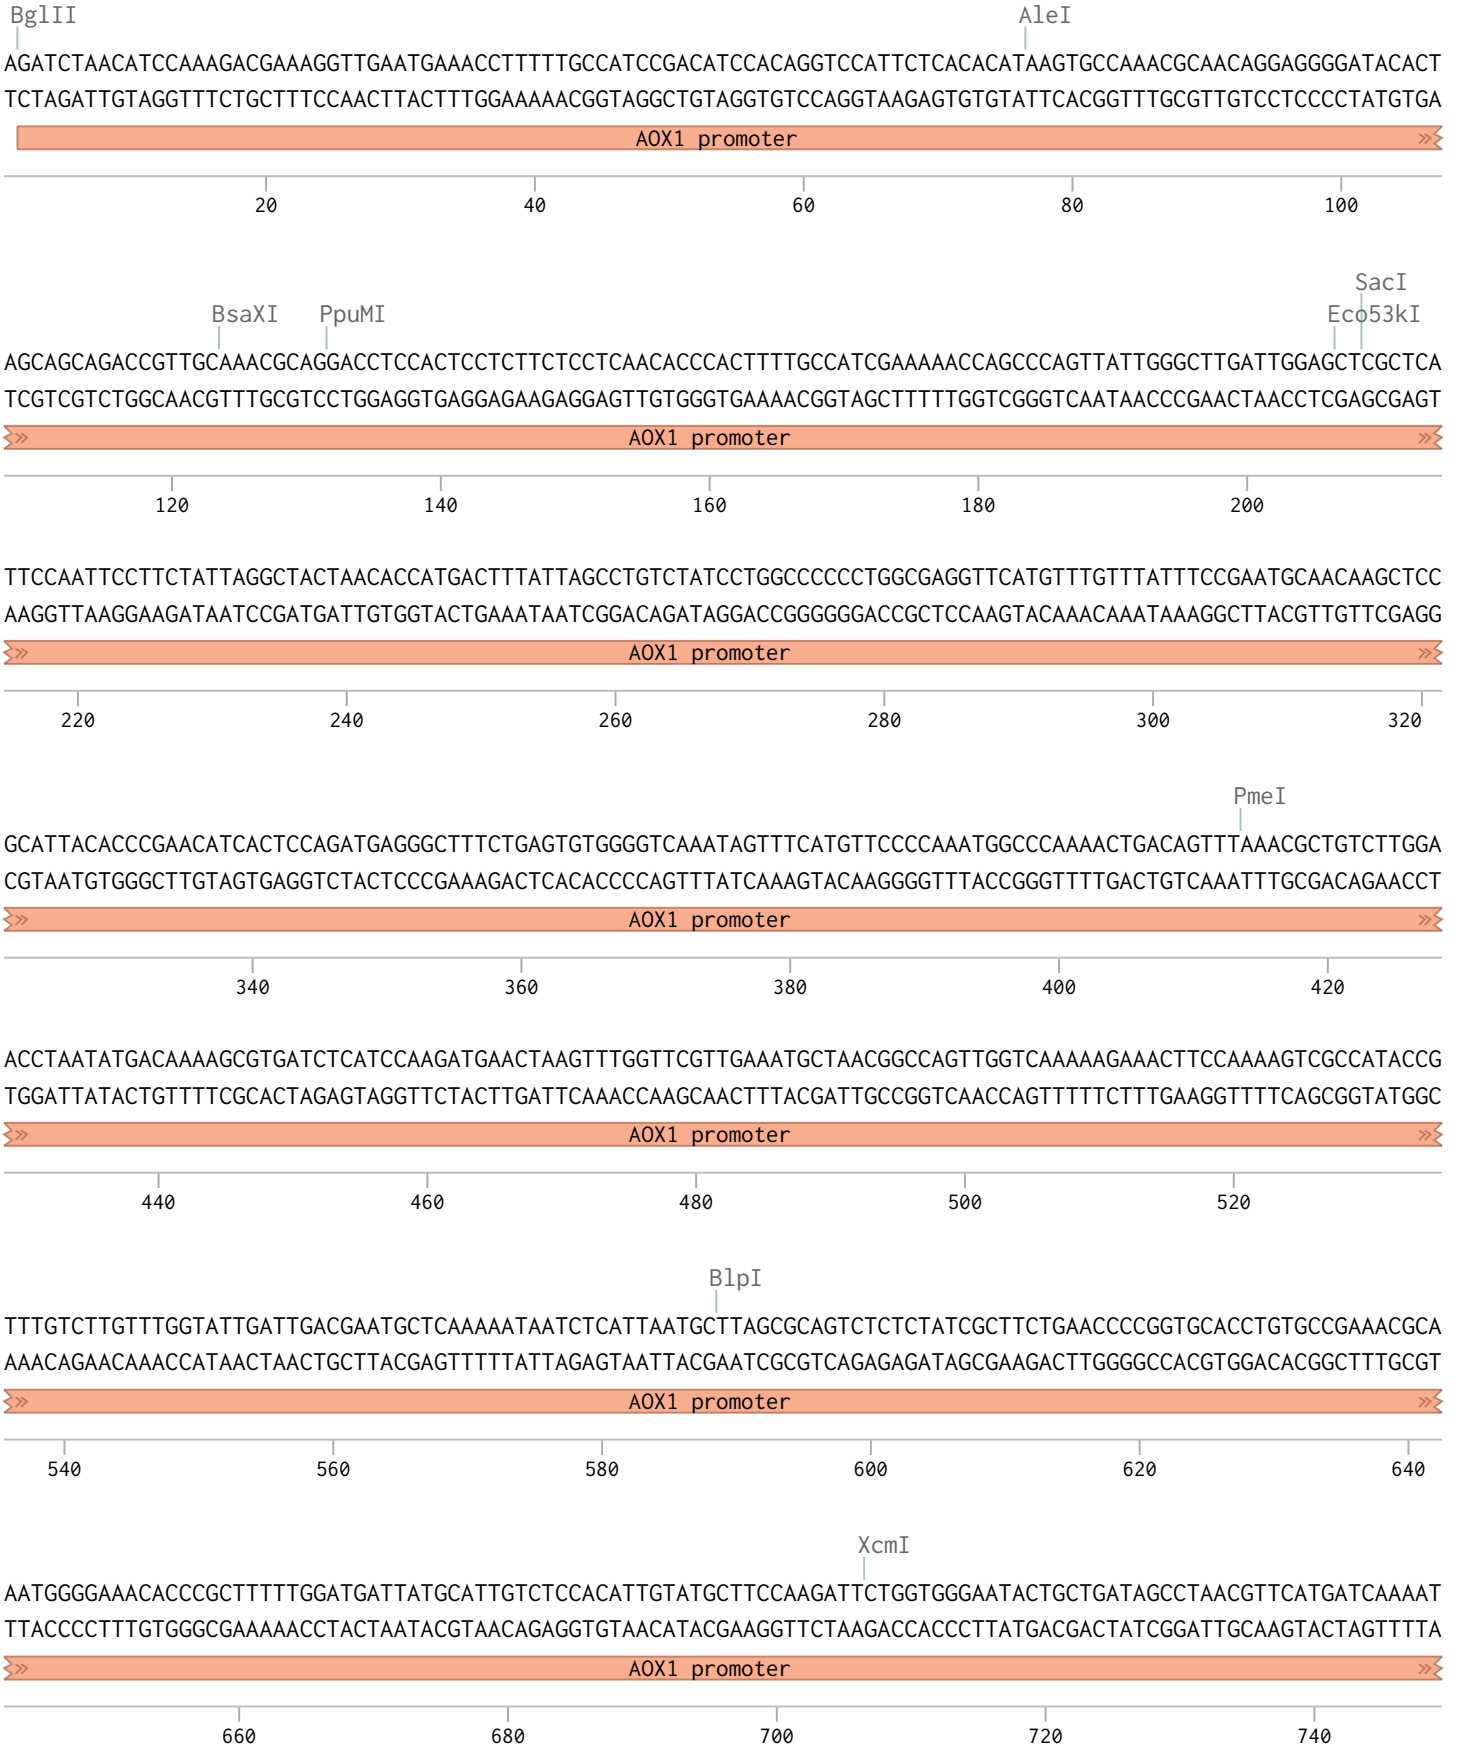

TAACTGTTCTAACCCCTACTTGACAGCAATATATAAACAGAAGGAAGCTGCCCTGTCTTAAACCTTTTTTTTATCATCATTATTAGCTTACTTTTCATAATTGCGA  
AATTGACAAGATTGGGGATGAACTGTCGTTATATATTTGTCTTCCTCGACGGGACAGAATTTGGAAAAAAAAATAGTAGTAATAATCGAATGAAAGTATTAACGCT

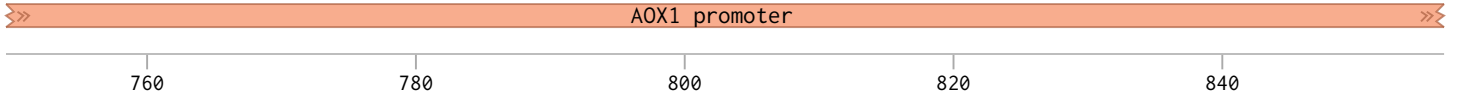

CTGGTTCCAATTGACAAGCTTTTGGATTTTAAACGACTTTTAAACGACAACCTTGAGAAGATCAAAAAACAATAATTATTGGAAGGATCCAACGATGAGATTTCTTCA  
GACCAAGGTTAACTGTTGAAAACTAAAATTGCTGAAAATTGCTGTTGAACTCTCTAGTTTTTTGTTGATTAATAAGCTTCTAGGTTTGCTACTCTAAAGGAAGT

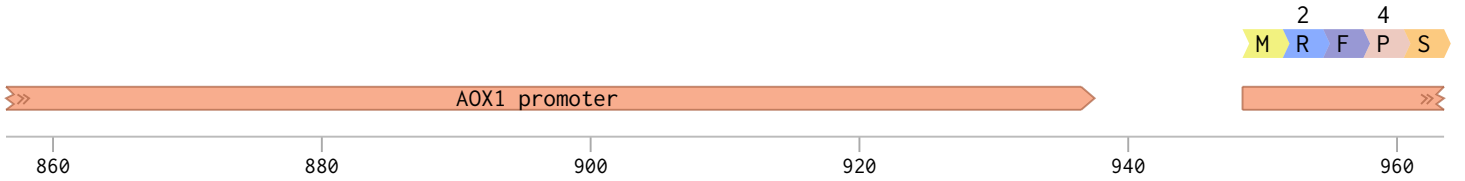

ATTTTACTGCAGTTTTATTTCGCAGCATCTCCGCATTAGCTGCTCCAGTCAACACTACAACAGAAGATGAAACGGCACAAATCCGGCTGAAGCTGTCATCGGTTA  
TAAAAATGACGTCAAAATAAGCGTCGTAGGAGGCGTAATCGACGAGGTCAGTTGTGATGTTGTCTTCTACTTTGCCGTGTTAAGGCCGACTTCGACAGTAGCCAAT

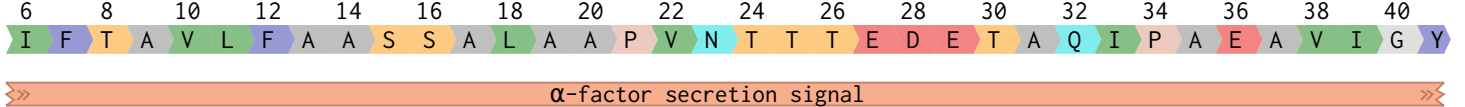

CTCAGATTTAGAAGGGGATTTTCGATGTTGCTGTTTTGCCATTTTCCAACAGCACAAAATAACGGGTTATTGTTTATAAATACTACTATTGCCAGCATTGCTGCTAAAG  
GAGTCTAAATCTTCCCTAAAGCTACAACGACAAAACGGTAAAAGGTTGTGCTGTTTATTGCCCAATAACAAATATTATGATGATAACGGTCTAACGACGATTTTC

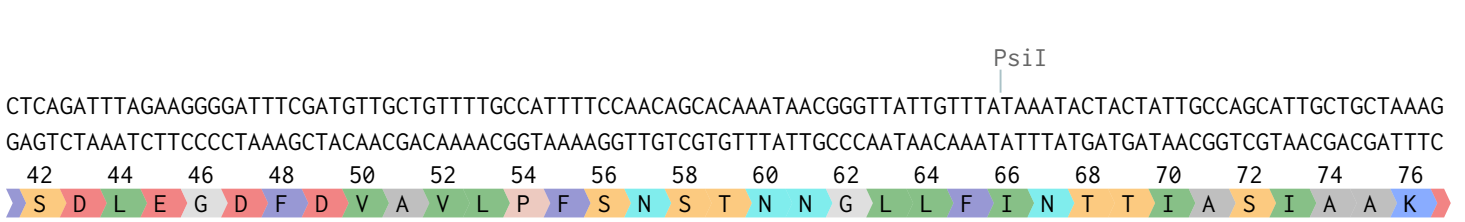

AAGAAGGGGTATCTCTCGAGAAAAGAGAGGCTGAAGCTTACGTAGAATTCGAAGTTCAGTTAGTTGAATCTGGTGGTGGCTCTGTCCAACCTGGTGGTTCTTACT  
TTCTTCCCATAGAGAGCTTTTTCTCTCCGACTTCGAATGCATCTTAAGCTTCAAGTCAATCAACTTAGACCACCACCGAGACAGGTTGGACCACCAAGAGAATGA

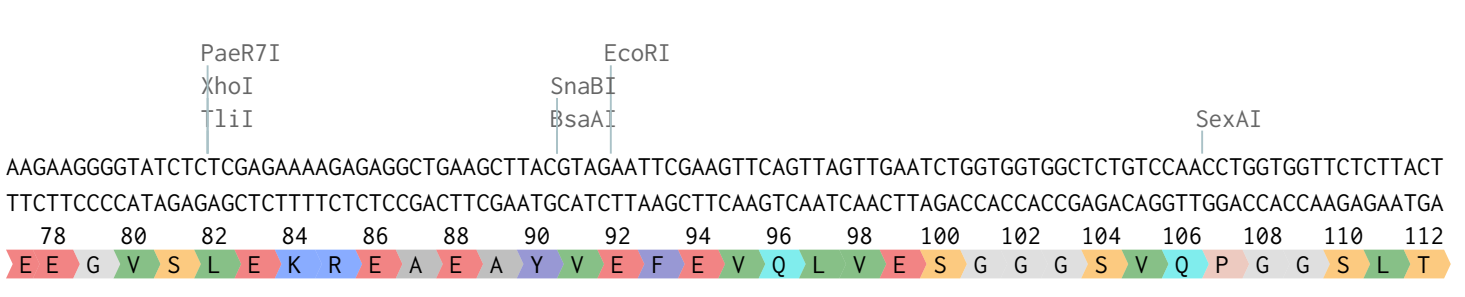

TTGCTGTGGTACTCCGGTAGAACCTTCAACGTTATGGGATGGTTCAGACAAGCTCCTGAAAGGAACGTGAGTTTGTGCTGCTGTTAGTGTTCTTACTGG  
AACAGGACACCATGAAGGCCATCTTGAAGTTGCAATACCTACCAAGTCTGTTTCGAGGACCTTTCTTGCCTCAACAGCGACGACAATCCACCAGAAGATGACC

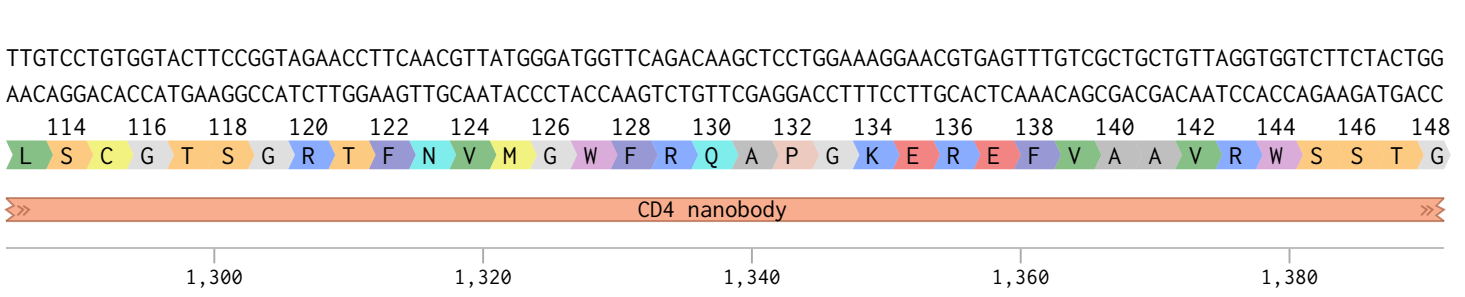



BcgI  
 ATCGATAAGCTTTAATGCGGTAGTTTATCACAGTTAAATTGCTAACGCAGTCAGGCACCGTGTATGAAATCTAACAATGCGCTCATCGTCATCCTCGGCACCGTCAC  
 TAGCTATTGAAATTACGCCATCAAATAGTGCAATTTAACGATTGCGTCAGTCCGTGGCACATACTTTAGATTGTTACGCGAGTAGCAGTAGGAGCCGTGGCAGTG

2,040 2,060 2,080 2,100 2,120 2,140

EcoRV BtgZI BmtI AfeI NheI  
 CCTGGATGCTGTAGGCATAGGCTTGTTATGCCGCTACTGCCGGCCCTCTTGCGGGATATCGTCCATTCCGACAGCATCGCCAGTCACTATGGCGTGTCTAGCGC  
 GGACCTACGACATCCGTATCCGAACCAATACGGCCATGACGGCCCGGAGAACGCCCTATAGCAGGTAAGGCTGTCTAGCGGTCACTGATACCGCACGACGATCGCG

2,160 2,180 2,200 2,220 2,240

FspAI  
 TATATGCGTTGATGCAATTTCTATGCGCACCCGTTCTCGGAGCACTGTCCGACCGTTTTGGCCGCCCCAGTCTGCTCGTTCGCTACTTGGAGCCACTATCGAC  
 ATATACGCAACTACGTTAAAGATACGCGTGGCAAGAGCCTCGTGACAGGCTGGCGAAACCGCGCGGGTCAAGACGAGCGAAGCGATGAACCTCGGTGATAGCTG

2,260 2,280 2,300 2,320 2,340

TACGCGATCATGGCGACCACCCGTCCTGTGGATCTATCGAATCTAAATGTAAGTTAAATCTCTAAATAATTAATAAGTCCCAGTTTTCTCCATACGAACCTTAA  
 ATGCGCTAGTACCGCTGGTGTGGGCAGGACACCTAGATAGCTTAGATTTACATTCAATTTTAGAGATTTATTAATTTATTCAGGGTCAAAGAGGTATGCTTGGAAAT

2,360 2,380 2,400 2,420 2,440 2,460

XbaI MscI Bsu36I  
 CAGCATTGCGGTGAGCATCTAGACCTTCAACAGCAGCCAGATCCATCACTGCTTGGCCAAATATGTTTCAGTCCCTCAGGAGTTACGTCTTGTGAAGTATGAACTTC  
 GTCGTAACGCCACTCGTAGATCTGGAAGTTGTCGTCGGTCTAGGTAGTGACGAACCGTTATACAAAGTCAGGGAGTCTCAATGCAGAACACTTCACTACTTGAAG

2,480 2,500 2,520 2,540 2,560

HpaI BsiWI KpnI Acc65I  
 TGGAAGTTGCAGTGTAACTCCGCTGTATTGACGGGCATATCCGTACGTTGGCAAAGTGTGTTGGTACCGGAGGAGTAATCTCCACAACCTCTCTGGAGAGTAGGC  
 ACCTTCCAACGTCACAATTGAGGCGACATAACTGCCGATAGGCATGCAACCGTTTACACCAACCATGGCTCCTCATTAGAGGTGTTGAGAGACCTCTCATCCG

2,580 2,600 2,620 2,640 2,660

AloI  
 ACCAACAAACACAGATCCAGCGTGTGACTTGATCAACATAAGAAGAAGCATTCTCGATTTGCAGGATCAAGTGTTCCAGGAGCGTACTGATTGGACATTTCCAAAG  
 TGGTTGTTTGTGTCTAGGTCGACAACATGAACTAGTTGATTCTTCTTCTCGTAAAGAGCTAAACGTCCTAGTTCACAAGTCTCGCATGACTAACCTGTAAAGTTTC

2,680 2,700 2,720 2,740 2,760 2,780

BsgI  
 CCTGCTCGTAGGTTGCAACCGATAGGTTGTAGAGTGTGAATACTTTCGTTACAATTTCAACCCTTGGCAACTGCACAGCTTGGTTGTGAACAGCATTTCAATT  
 GGACGAGCATCCAACGTTGGCTATCCCAACATCTCACACGTTATGTGAACGCATGTTAAAGTTGGGAACCGTTGACGTGTGCAACCAACACTTGTCTGAGAAGTTAA

2,800 2,820 2,840 2,860 2,880

CTGGCAAGCTCCTTGTCTGTCATATCGACAGCCAACAGAATCACCTGGGAATCAATACCATGTTTCAGCTTGAGACAGAAGGTCTGAGGCAACGAAATCTGGATCAGC  
GACCGTTCGAGGAACAGACAGTATAGCTGTGGTGTCTTAGTGGACCCTTAGTTATGGTACAAGTCGAACCTCTGTCTTCCAGACTCCGTTGCTTTAGACCTAGTCG

2,900 2,920 2,940 2,960 2,980

GTATTTATCAGCAATAACTAGAACTTCAGAAGGCCAGCAGGCATGTCAATACTACACAGGGCTGATGTGTCATTTTGAACCATCATCTTGGCAGCAGTAACGAACT  
CATAAATAGTCGTTATTGATCTTGAAGCTTCCGGGTCGTCGGTACAGTTATGATGTGCCGACTACACAGTAAAACCTGGTAGTAGAACCGTCGCATTGCTTGA

3,000 3,020 3,040 3,060 3,080 3,100

GGTTTCCTGGACCAATATTTTGTACACTTAGGAACAGTTTCTGTTCCGTAAGCCATAGCAGCTACTGCCTGGGCGCCTCCTGCTAGCAGATACACTTAGCACCA  
CCAAAGGACCTGGTTTATAAACAGTGTGAATCCTTGTCAAAGACAAGGCATTCCGGTATCGTCGATGACGGACCCGCGGAGGACGATCGTCTATGTGAATCGTGGT

3,120 3,140 3,160 3,180 3,200

BmtI  
NheI

ACCTTGTGGCAACGTAGATGACTTCTGGGGTAAGGGTACCATCCTTCTTAGGTGGAGATGCAAAAACAATTTCTTTGCAACCAGCAACTTTGGCAGGAACACCCAG  
TGGAACACCCGTTGCATCTACTGAAGACCCCATCCCATGGTAGGAAGAATCCACCTCTACGTTTTTGTAAAGAAACGTTGGTCGTTGAAACCGTCCTTGTGGGTC

3,220 3,240 3,260 3,280 3,300

KpnI  
Acc65I

CATCAGGGAAGTGAAGGCAGAATTGCGTTCCACCAGGAATATAGAGGCCAACTTTCTCAATAGGTCTTGCAAAACGAGAGCAGACTACACCAGGGCAAGTCTCAA  
GTAGTCCCTTACCTTCCGTCTTAACGCCAAGGTGGTCCTATATCTCCGGTGAAGAGTTATCCAGAACGTTTTGCTCTCGTCTGATGTGGTCCCGTTCAGAGTT

3,320 3,340 3,360 3,380 3,400 3,420

CTTGCAACGTCTCCGTTAGTTGAGCTTCATGGAATTTCTGACGTTATCTATAGAGAGATCAATGGCTCTCTAACGTTATCTGGCAATTGCATAAGTTCTCTGGG  
GAACGTTGCAGAGGCAATCAACTCGAAGTACCTTAAAGGACTGCAATAGATATCTCTAGTTACCGAGAGAATTGCAATAGACCGTTAACGTATTCAAGGAGACCC

3,440 3,460 3,480 3,500 3,520

AAAGGAGCTTCTAACACAGGTGTCTTCAAAGCGACTCCATCAAACCTTGGCAGTTAGTTCTAAAAGGGCTTTGTACCATTTTGACGAACATTGTCGACAATTGGTTT  
TTTCTCGAAGATTGTGTCCACAGAAGTTTCGCTGAGGTAGTTTGAACCGTCAATCAAGATTTTCCCGAAACAGTGGTAAAACCTGCTTGTAAACAGCTGTTAACCAA

3,540 3,560 3,580 3,600 3,620

SalI

GACTAATCCATAATCTGTTCCGTTTTCTGGATAGGACGACGAAGGGCATCTTCAATTTCTTGTGAGGAGGCCTTAGAAAACGTCAATTTTGACAATTCAATACGAC  
CTGATTAAGGTATTAGACAAGGCAAAAGACCTATCCTGCTGCTTCCCGTAGAAGTTAAAGAACTCCTCCGGAATCTTTGCAGTTAAAACGTGTTAAGTTATGCTG

3,640 3,660 3,680 3,700 3,720 3,740

StuI

CTTCAGAAGGGACTTCTTTAGTTTGGATTCTTCTTTAGGTTGTTCTTGGTGTATCCTGGCTTGGCATCTCCTTTCTTCTAGTGACCTTTAGGGACTTCATATCC  
GAAGTCTTCCCTGAAGAAATCCAAACCTAAGAAGAAATCCAACAAGGAACCACATAGGACCGAACCGTAGAGGAAAGGAAGATCACTGAAATCCCTGAAGTATAGG

3,760 3,780 3,800 3,820 3,840



AGGTTTCTCTCCACCTCGTCCAACGTCACACCGTACTTGGCACATCTAACTAATGCAAAATAAAATAAGTCAGCACATTCCCAGGCTATATCTTCCTTGGATTTAGC  
TCCAAAGAGAGGTTGGAGCAGGTTGCAGTGTGGCATGAACCGTGTAGATTGATTACGTTTTATTTTATTCAGTCGTGTAAGGGTCCGATATAGAAGGAACCTAAATCG

3,860

3,880

3,900

3,920

3,940

TTCTGCAAGTTCATCAGCTTCCTCCCTAATTTTAGCGTTCAACAAAACCTTCGTCGTCAAATAACCGTTTGGTATAAGAACCTTCTGGAGCATTGCTCTTACGATCCC  
AAGACGTTCAAGTAGTCGAAGGAGGGATTAATCGCAAGTTGTTTTGAAGCAGCAGTTTATTGGCAAACCATATTCTTGAAGACCTCGTAACGAGAATGCTAGGG

3,960

3,980

4,000

4,020

4,040

4,060

DraIII NcoI

MscI

ACAAGGTGGCTTCCATGGCTCTAAGACCCCTTTGATTGGCCAAAACAGGAAGTGCCTTCCAAGTGACAGAAACCAACACCTGTTTGTCAACCACAAAATTTCAAGCAG  
TGTTCCACCGAAGGTACCGAGATTCTGGGAAACTAACCGGTTTTGCCTTCACGCAAGGTTCACTGTCTTTGGTTGTGGACAAACAAGTTGGTGTAAAGTTCGTC

4,080

4,100

4,120

4,140

4,160

TCTCCATCACAATCCAATTCGATACCCAGCAACTTTTGAGTTGCTCCAGATGTAGCACCTTTATACCACAAACCGTGACGACGAGATTGGTAGACTCCAGTTTGTGT  
AGAGGTAGTGTAGGTTAAGCTATGGGTCGTTGAAAACCTAACGAGGTCTACATCGTGAAATATGGTGTGGCACTGCTGCTCTAACCATCTGAGGTCAAACACA

4,180

4,200

4,220

4,240

4,260

4,280

BspEI

CCTTATAGCCTCCGGAATAGACTTTTTGGACGAGTACACCAGGCCAACGAGTAATTAGAAGAGTCAGCCACCAAAGTAGTGAATAGACCATCGGGGCGGTCACTAG  
GGAATATCGGAGGCCTTATCTGAAAACCTGCTCATGTGGTCCGGTTGCTCATTAACTTCTCAGTCGGTGGTTTCATCACTTATCTGGTAGCCCGCCAGTCATC

4,300

4,320

4,340

4,360

4,380

TCAAAGACGCCAACAAAATTTCACTGACAGGGAACCTTTTGACATCTTCAGAAAGTTCGTATTAGTCAATTGCCGAGCATCAATAATGGGGATTATACCAGAA  
AGTTTCTGCGGTTGTTTTAAAGTGACTGTCCCTTGAAAACCTGTAGAAGTCTTTCAAGCATAAGTCATCAGTTAACGGCTCGTAGTTATTACCCTAATATGGTCTT

4,400

4,420

4,440

4,460

4,480

GCAACAGTGGAAAGTCACATCTACCAACTTTGCGGTCTCAGAAAAAGCATAAACAGTTCTACTACCGCCATTAGTGAAACTTTTTCAAATCGCCAGTGGAGAAGAAAA  
CGTTGTCACCTTCAGTGTAGATGGTTGAAACGCCAGAGTCTTTTTCGTATTTGTCAAGATGATGGCGGTAATCACTTTGAAAAGTTTAGCGGGTCACTCTTCTTTT

4,500

4,520

4,540

4,560

4,580

4,600

PpuMI

AGGCACAGCGATACTAGCATTAGCGGGCAAGGATGCAACTTTATCAACCAGGGTCTATAGATAACCTAGCGCCTGGGATCATCCTTTGGACAACCTTTCTGCCA  
TCCGTGTCGCTATGATCGAATCGCCGTTTCTACGTTGAAATAGTTGGTCCCAGGATATCTATTGGGATCGCGACCTAGTAGGAAACCTGTTGAGAAAGACGGT

4,620

4,640

4,660

4,680

4,700

BsrGI

AATCTAGGTCCAAAATCACTTCATTGATACCATTTGTACAACCTTGAGCAAGTTGTCGATCAGCTCCTCAAATTGGTCTCTGTAACGGATGACTCAACTTGACA  
TTAGATCCAGTTTTAGTGAAGTAACTATGGTAATAACATGTTGAACTCGTTCAACAGCTAGTCGAGGAGTTAACCCAGGAGACATTGCCTACTGAGTTGAACGTGT

4,720

4,740

4,760

4,780

4,800

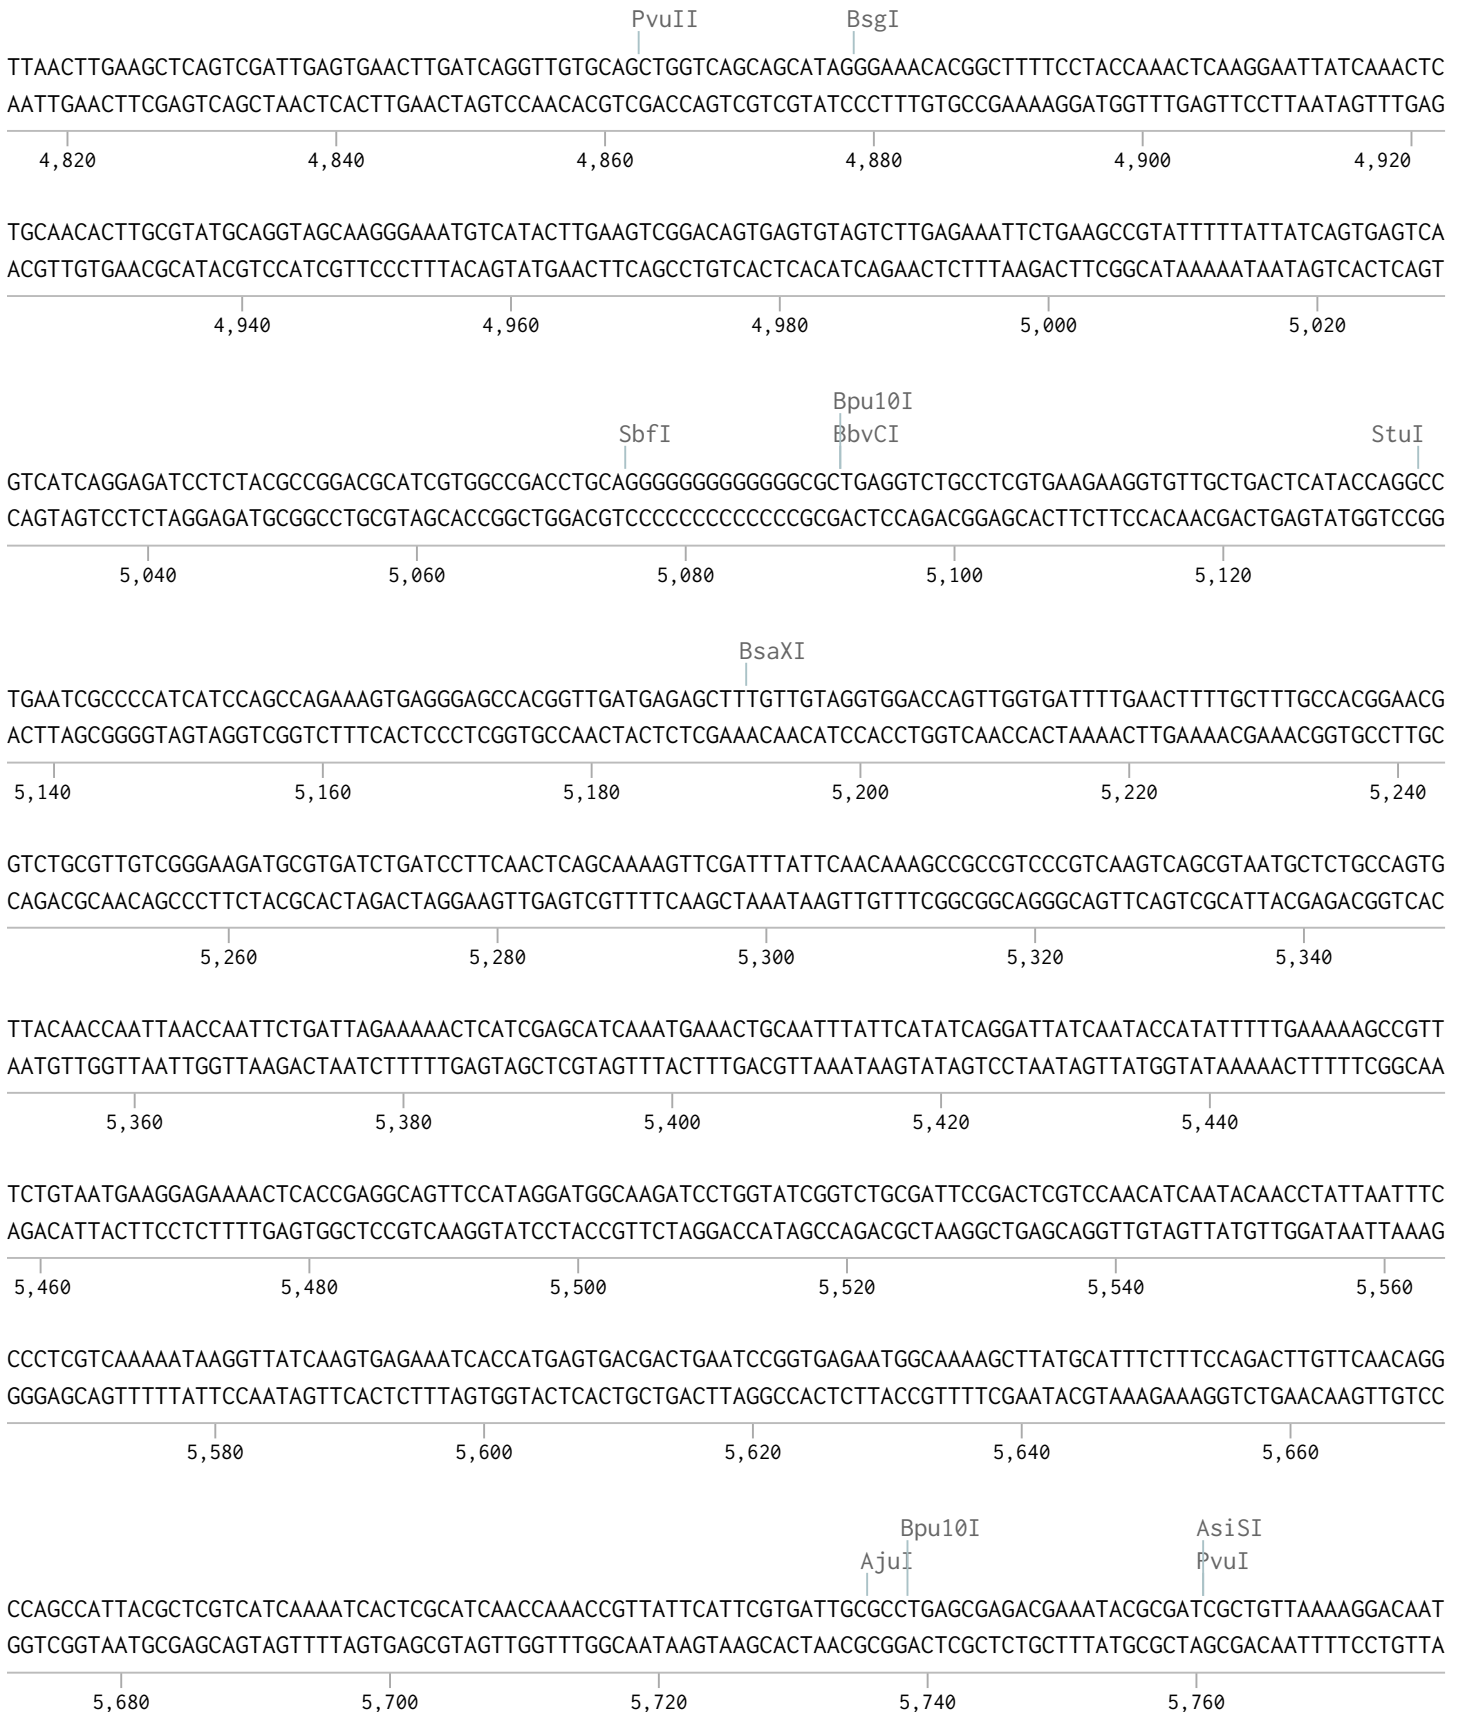

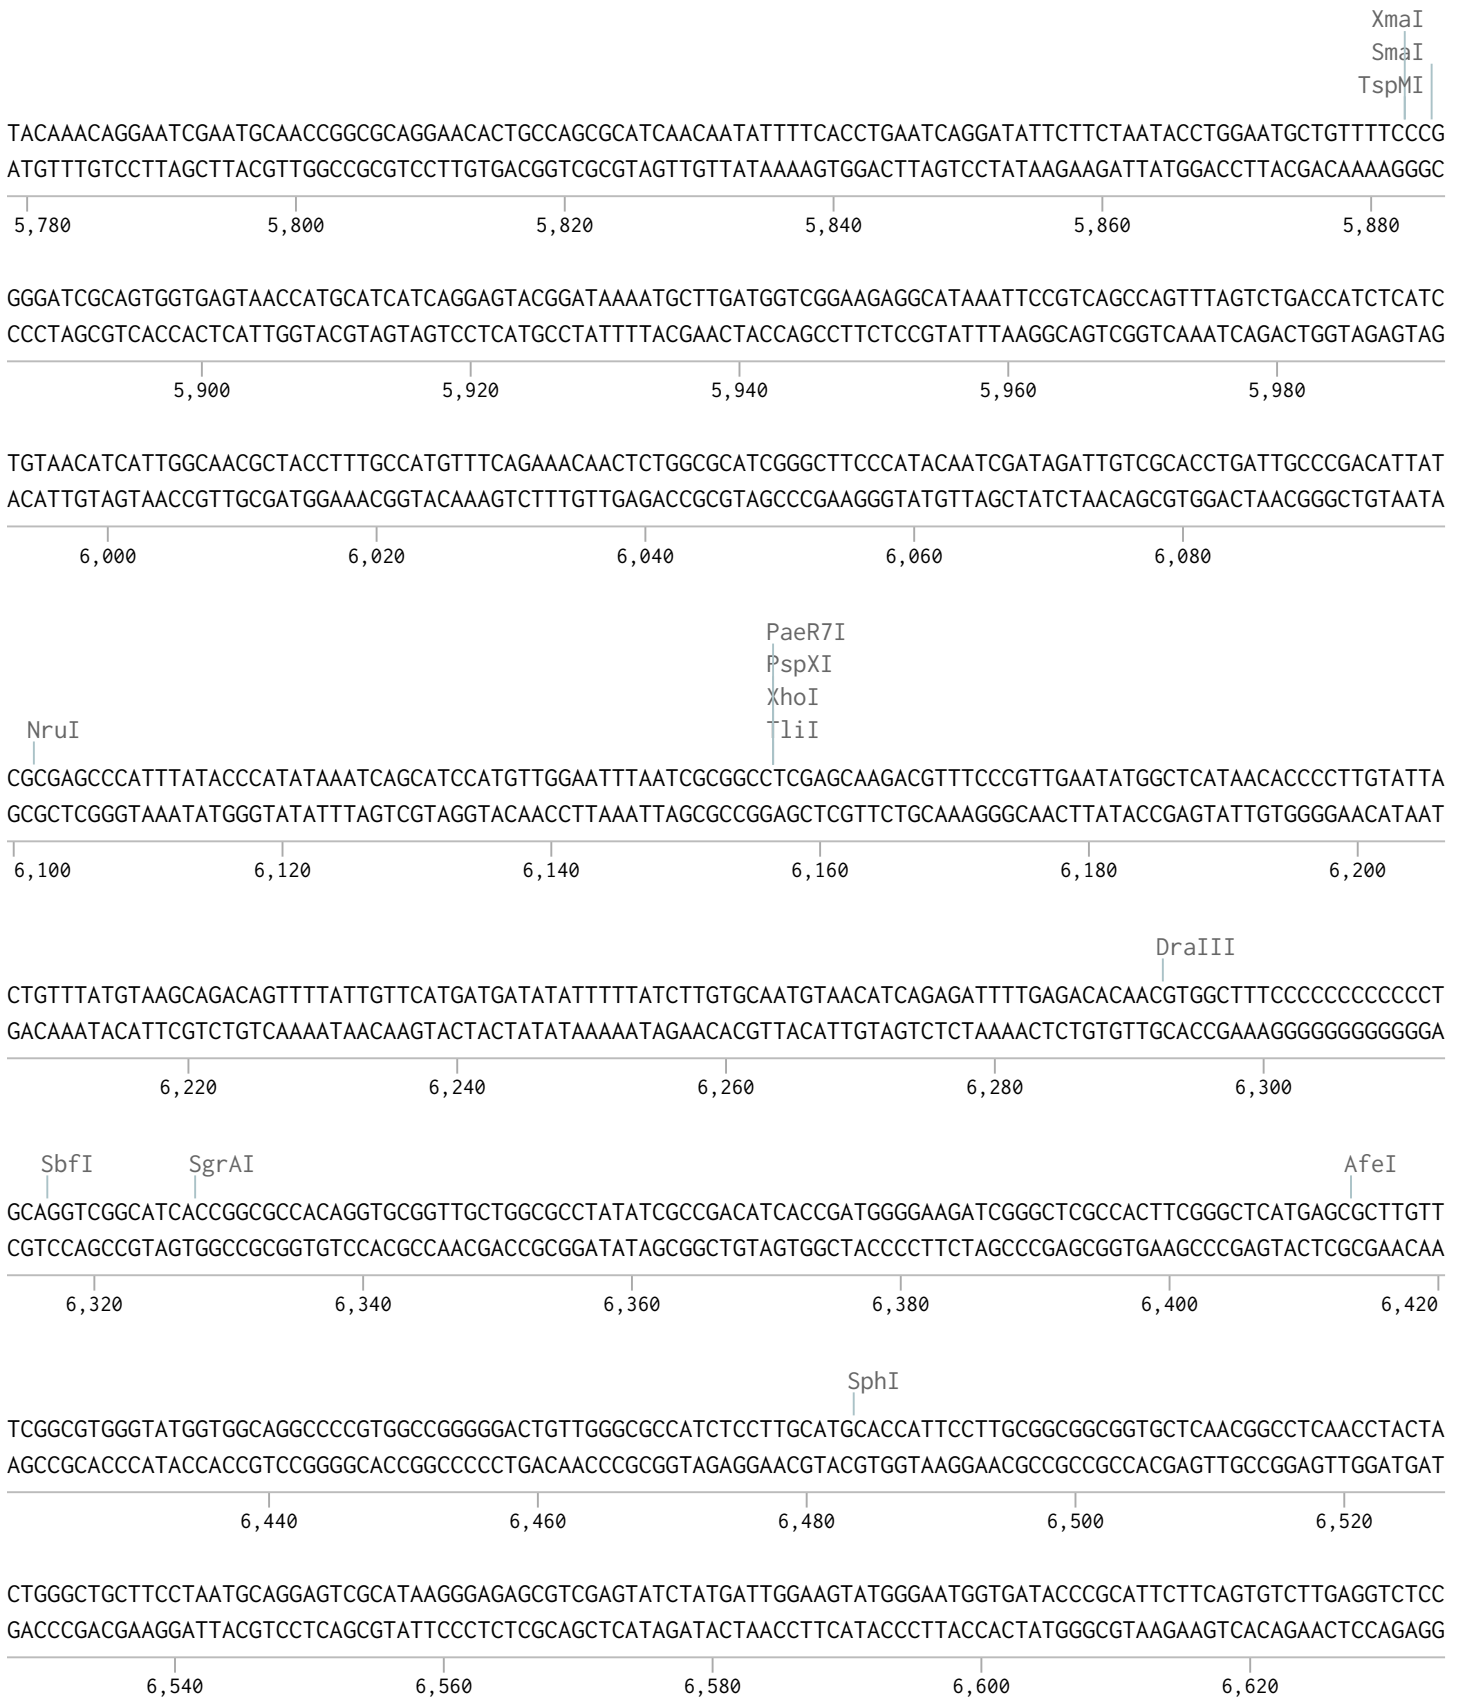

TATCAGATTATGCCCAACTAAAGCAACCGGAGGAGGAGATTTTCATGGTAAATTTCTCTGACTTTTGGTCATCAGTAGACTCGAACTGTGAGACTATCTCGGTTATGA  
ATAGTCTAATACGGGTTGATTCGTTGGCCTCCTCTCTAAAGTACCATTTAAAGAGACTGAAAACCAGTAGTCATCTGAGCTTGACACTCTGATAGAGCCAATACT

6,640 6,660 6,680 6,700 6,720 6,740

CAGCAGAAATGTCCTTCTTGGAGACAGTAAATGAAGTCCCACCAATAAAGAAATCCTTGTATCAGGAACAAACTTCTTGTTCGAACTTTTTCGGTGCCTTGAAC  
GTCGTCTTTACAGGAAGAACCTCTGTCATTTACTTCAGGGTGGTTATTTCTTTAGGAACAATAGTCTTGTTTGAAGAACAAAGCTTGAAAAAGCCACGGAACCTTGA

6,760 6,780 6,800 6,820 6,840

ATAAAATGTAGAGTGGATATGTCGGGTAGGAATGGAGCGGGCAAATGCTTACCTTCTGGACCTTCAAGAGGTATGTAGGGTTTGTAGATACTGATGCCAACTTCAGT  
TATTTTACATCTCACCTATACAGCCCATCCTTACCTCGCCGTTTACGAATGGAAGACCTGGAAGTTCTCCATACATCCCAAACATCTATGACTACGGTTGAAGTCA

6,860 6,880 6,900 6,920 6,940

GACAACGTTGCTATTTCTGTTCAAACCATTCCGAATCCAGAGAAATCAAAGTTGTTTGTCTACTATTGATCCAAGCCAGTGCAGTCTTGAACACTGACAATAGTGTGCT  
CTGTTGCAACGATAAAGCAAGTTTGGTAAAGGCTTAGGTCTCTTTAGTTTCAACAAACAGATGATAACTAGGTTCCGTCACGCCAGAAGCTTTGACTGTTATCACACGA

6,960 6,980 7,000 7,020 7,040 7,060

CGTGTGTTGAGGTCATCTTTGTATGAATAAATCTAGTCTTTGATCTAAATAATCTTGACGAGCCAAGGCGATAAATACCCAAATCTAAAACCTTTTTAAAACGTTAA  
GCACAAAACCTCCAGTAGAAACATACTTATTTAGATCAGAAACTAGATTTATTAGAAGTCTCGGTTCCGCTATTTATGGGTTTGTAGTTTTGAGAAAATTTTGAATTT

7,080 7,100 7,120 7,140 7,160

AAGGACAAGTATGTCTGCCTGTATTAACCCCAAATCAGCTCGTAGTCTGATCCTCATCAACTTGAGGGGCACTATCTTGTGTTTGTAGAGAAATTTGCGGAGATGCGAT  
TTCCTGTTACATACAGACGGACATAATTTGGGTTTGTAGTCGAGCATCAGACTAGGAGTAGTTGAACCTCCCGTGATAGAACAAAATCTCTTTAAACGCCTCTACGCTA

7,180 7,200 7,220 7,240 7,260

EcoRV

BglII

ATCGAGAAAAAGGTACGCTGATTTTAAACGTGAAATTTATCTCAAGATCTCTGCCTCGCGGTTTCGGTGATGACGGTGAAAACCTCTGACACATGCAGTCCCAGTA  
TAGCTCTTTTCCATGCGACTAAAATTTGCACTTTAAATAGAGTTCTAGAGACGGAGCGCGCAAAGCCACTACTGCCACTTTTGGAGACTGTGTACGTCGAGGGCCT

7,280 7,300 7,320 7,340 7,360 7,380

BsaAI

Tth111I

Pf1FI

GACGGTCACAGCTTGTCTGTAAGCGGATGCCGGGAGCAGACAAGCCCGTCAGGGCGCGTCAGCGGTTGTTGGCGGGTGTGCGGGCGCAGCCATGACCCAGTCACGTA  
CTGCCAGTGTGCAACAGACATTGCGCTACGGCCCTCGTCTGTTGCGGCAGTCCCGCGCAGTCGCCACAACCGCCACAGCCCCGCGTCCGTTACTGGGTCAGTGCAT

7,400 7,420 7,440 7,460 7,480

BstZ17I

NdeI

GCGATAGCGGAGTGTATACTGGCTTAACTATGCGGCATCAGAGCAGATTGACTGAGAGTGCACCATATGCGGTGTGAAATACCGCACAGATGCGTAAGGAGAAAAAT  
CGCTATCGCCTCACATATGACCGAATTGATACGCCGTAGTCTCGTCTAACATGACTCTCACGTGGTATACGCCACACTTTATGGCGTGTCTACGCATTCTCTTTTA

7,500 7,520 7,540 7,560 7,580

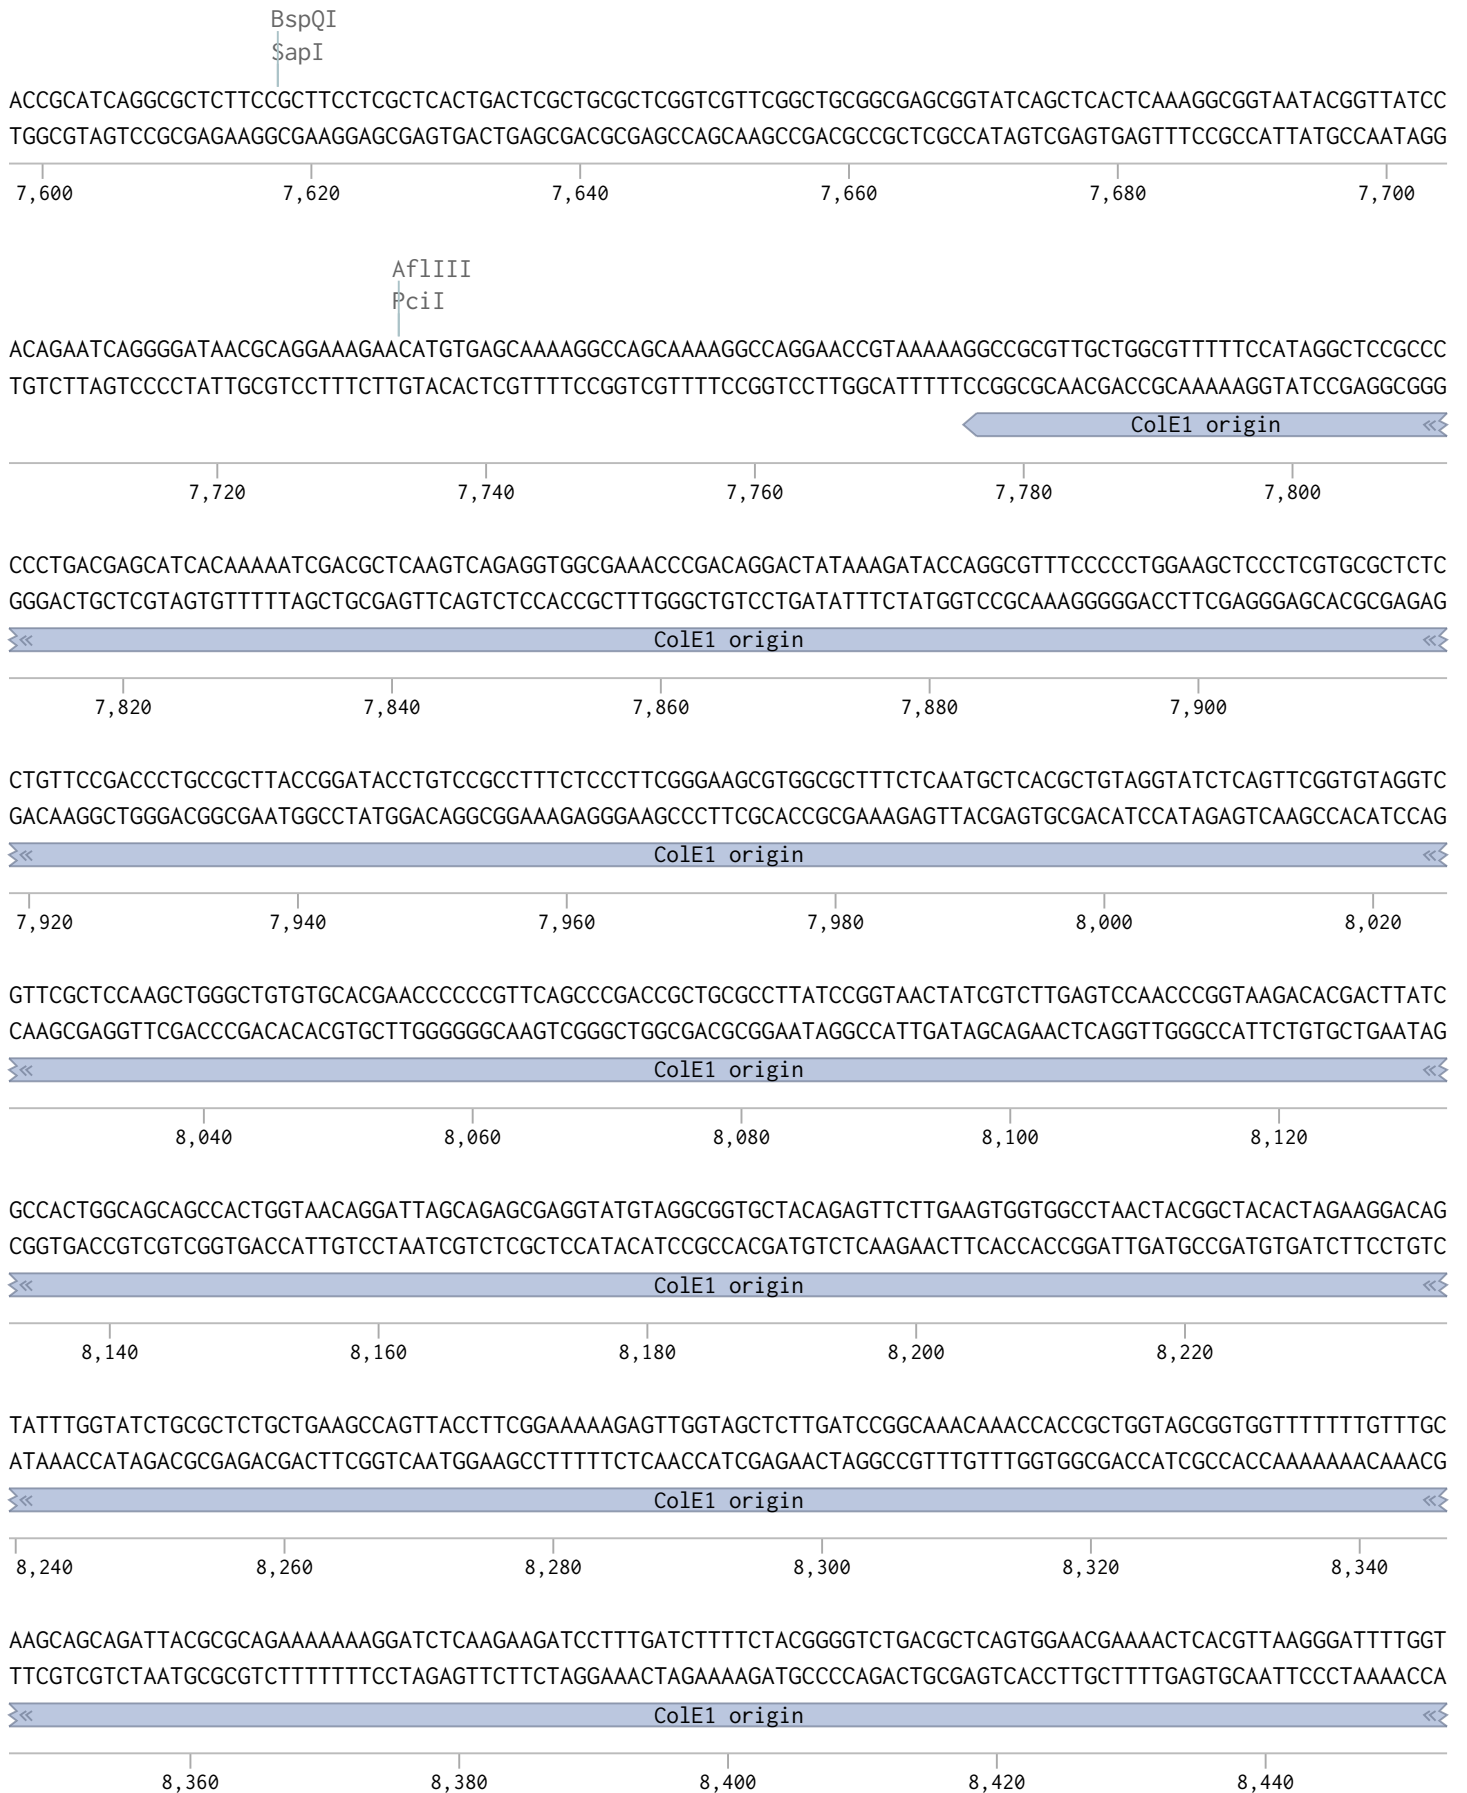

CATGAGATTATCAAAAAGGATCTTCACCTAGATCCTTTTAAATTAATAAATGAAGTTTTAAATCAATCTAAAGTATATATGAGTAACTGGTCTGACAGTTACCAAT  
GTAATCTAATAGTTTTCTAGAAAGTGGATCTAGAAAATTTAATTTTTACTTCAAAATTTAGTTAGATTTTCATATATACTCATTGAACCCAGACTGTCAATGGTTA

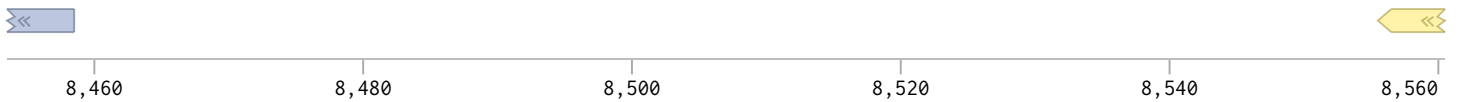

GCTTAATCAGTGAGGCACCTATCTCAGCGATCTGTCTATTTTCGTTTCATCCATAGTTGCCTGACTCCCCGTCGTGTAGATAACTACGATACGGGAGGGCTTACCATCT  
CGAATTAGTCACTCCGTGGATAGAGTCGCTAGACAGATAAAGCAAGTAGGTATCAACGGACTGAGGGGCAGCACATCTATTGATGCTATGCCCTCCGAATGGTAGA

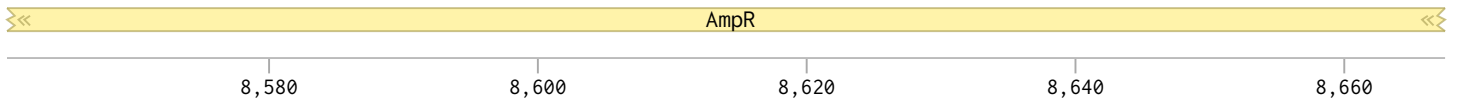

GGCCCCAGTGCTGCAATGATACCGCGAGACCCACGCTCACCGGCTCCAGATTTATCAGCAATAAACCAGCCAGCCGGAAGGGCCGAGCGCAGAAGTGGTCTGCAAC  
CCGGGGTCACGACGTTACTATGGCGCTCTGGGTGCGAGTGGCCGAGGTCTAAATAGTCGTTATTTGGTCGGTCGGCCTTCCCGCTCGCGTCTTACCAGGACGTTG

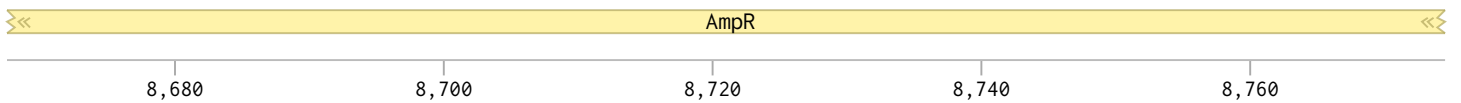

TTTATCCGCCTCATCCAGTCTATTAATTGTTGCCGGAAGCTAGAGTAAGTAGTTCCGCGGTAATAGTTTGCACAACGTTGTTGCCATTGCTGCAGGCATCGTGG  
AAATAGGCGGAGGTAGGTCAGATAATTAACAACGCCCTTCGATCTCATTATCAAGCGGTAATTATCAAACGCGTTGCAACAACGGTAACGACGTCCTAGCACC

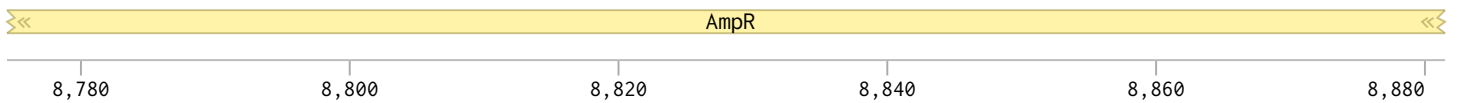

TGTCACGCTCGTCGTTTGGTATGGCTTCACTCAGCTCCGGTTCCCAACGATCAAGGCGAGTTACATGATCCCCATGTTGTGCAAAAAAGCGGTTAGCTCCTTCGGT  
ACAGTGCAGCAGCAAACCATACCGAAGTAAGTCGAGGCCAAGGGTGTAGTCCGCTCAATGTACTAGGGGTACAACACGTTTTTCGCCAATCGAGGAAGCCA

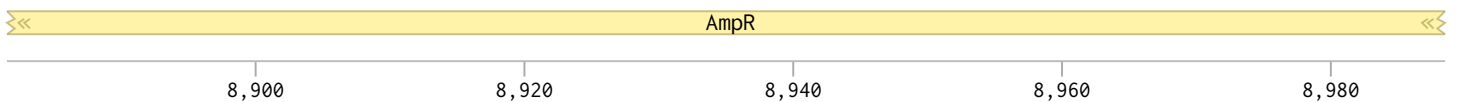

CCTCCGATCGTTGTGCAAGTAAGTTGGCCGAGTGTATCACTCATGGTTATGGCAGCACTGCATAATTCTCTTACTGTCATGCCATCCGTAAGATGCTTTTCTGT  
GGAGGCTAGCAACAGTCTTCATTCAACCGCGTCACAATAGTGAGTACCAATACCGTCGTGACGTATTAAGAGAATGACAGTACGGTAGGCATTCTACGAAAAGACA

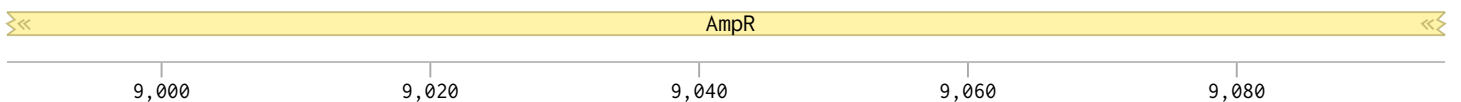

GACTGGTGAAGTACTCAACCAAGTATTCTGAGAATAGTGTATGCGGCGACCGAGTTGCTCTTGCCCGCGTCAACACGGGATAATACCGGCCACATAGCAGAACTT  
CTGACCACTCATGAGTTGGTTCAGTAAGACTCTTATCACATACGCCGCTGGCTCAACGAGAACGGGCCGAGTTGTGCCCTATTATGGCGCGGTGTATCGTCTTGA

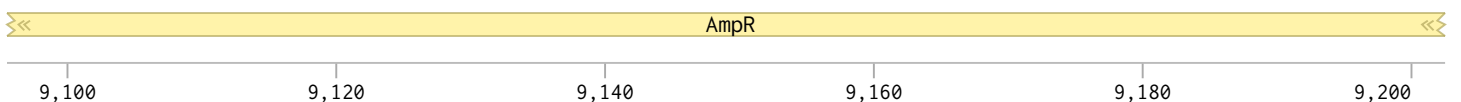

TAAAAGTGCTCATCATTGGAACGTTCTTCGGGGCGAAAACCTCTCAAGGATCTTACCGTGTGAGATCCAGTTTCGATGTAACCCACTCGTGACCCAACTGATCT  
ATTTTCACGAGTAGTAACCTTTTGAAGAAGCCCGCTTTTGAAGTCTCTAGAAATGGCGACAACCTTAGGTCAAGCTACATTGGGTGAGCACGTGGGTTGACTAGA

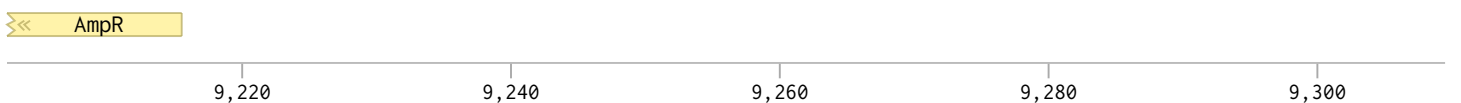

TCAGCATCTTTTACTTTACCAGCGTTTCTGGGTGAGCAAAAACAGGAAGGCAAAATGCCGCAAAAAGGGAATAAGGGCGACACGGAAATGTTGAATACTCATACT  
AGTCGTAGAAAATGAAAGTGGTCGCAAAGACCCACTCGTTTTTGTCTTCCGTTTTACGGCGTTTTTCCCTTATCCCGCTGTGCCTTACAACCTATGAGTATGA

9,320

9,340

9,360

9,380

9,400

CTTCCTTTTTCAATATTATTGAAGCATTATCAGGGTTATTGTCTCATGAGCGGATACATATTTGAATGATTTAGAAAAATAACAAATAGGGGTTCCGCGCACAT  
GAAGGAAAAGTTATAATAACTTCGTAAATAGTCCCAATAACAGAGTACTCGCCTATGTATAAECTTACATAAATCTTTTTATTGTTTATCCCAAGGCGCGTGTA

9,420

9,440

9,460

9,480

9,500

9,520

AatII

ZraI

TTCCCGAAAAGTGCCACCTGACGTCTAAGAAACCATTATTATCATGACATTAACCTATAAAAATAGGCGTATCACGAGGCCCTTTCGTCTTCAAGAATTAATTCTC  
AAGGGCTTTTACGGTGGACTGCAGATTCTTGGTAATAATAGTACTGTAATTGGATATTTTTATCCGCATAGTGCTCCGGGAAAGCAGAAGTTCTTAATTAAGAG

9,540

9,560

9,580

9,600

9,620

ATGTTTGACAGCTTATCATCGATAAGCTGACTCATGTTGGTATTGTGAAATAGACGCAGATCGGGAACACTGAAAAATAACAGTTATTATTCG  
TACAACTGTGCAATAGTAGCTATTCGACTGAGTACAACCATAACACTTTATCTGCGTCTAGCCCTTGTGACTTTTTATTGTCAATAATAAGC

9,640

9,650

9,660

9,670

9,680

9,690

9,700

9,710

9,720

# Anti-GFP-FLAG (9654 bp)

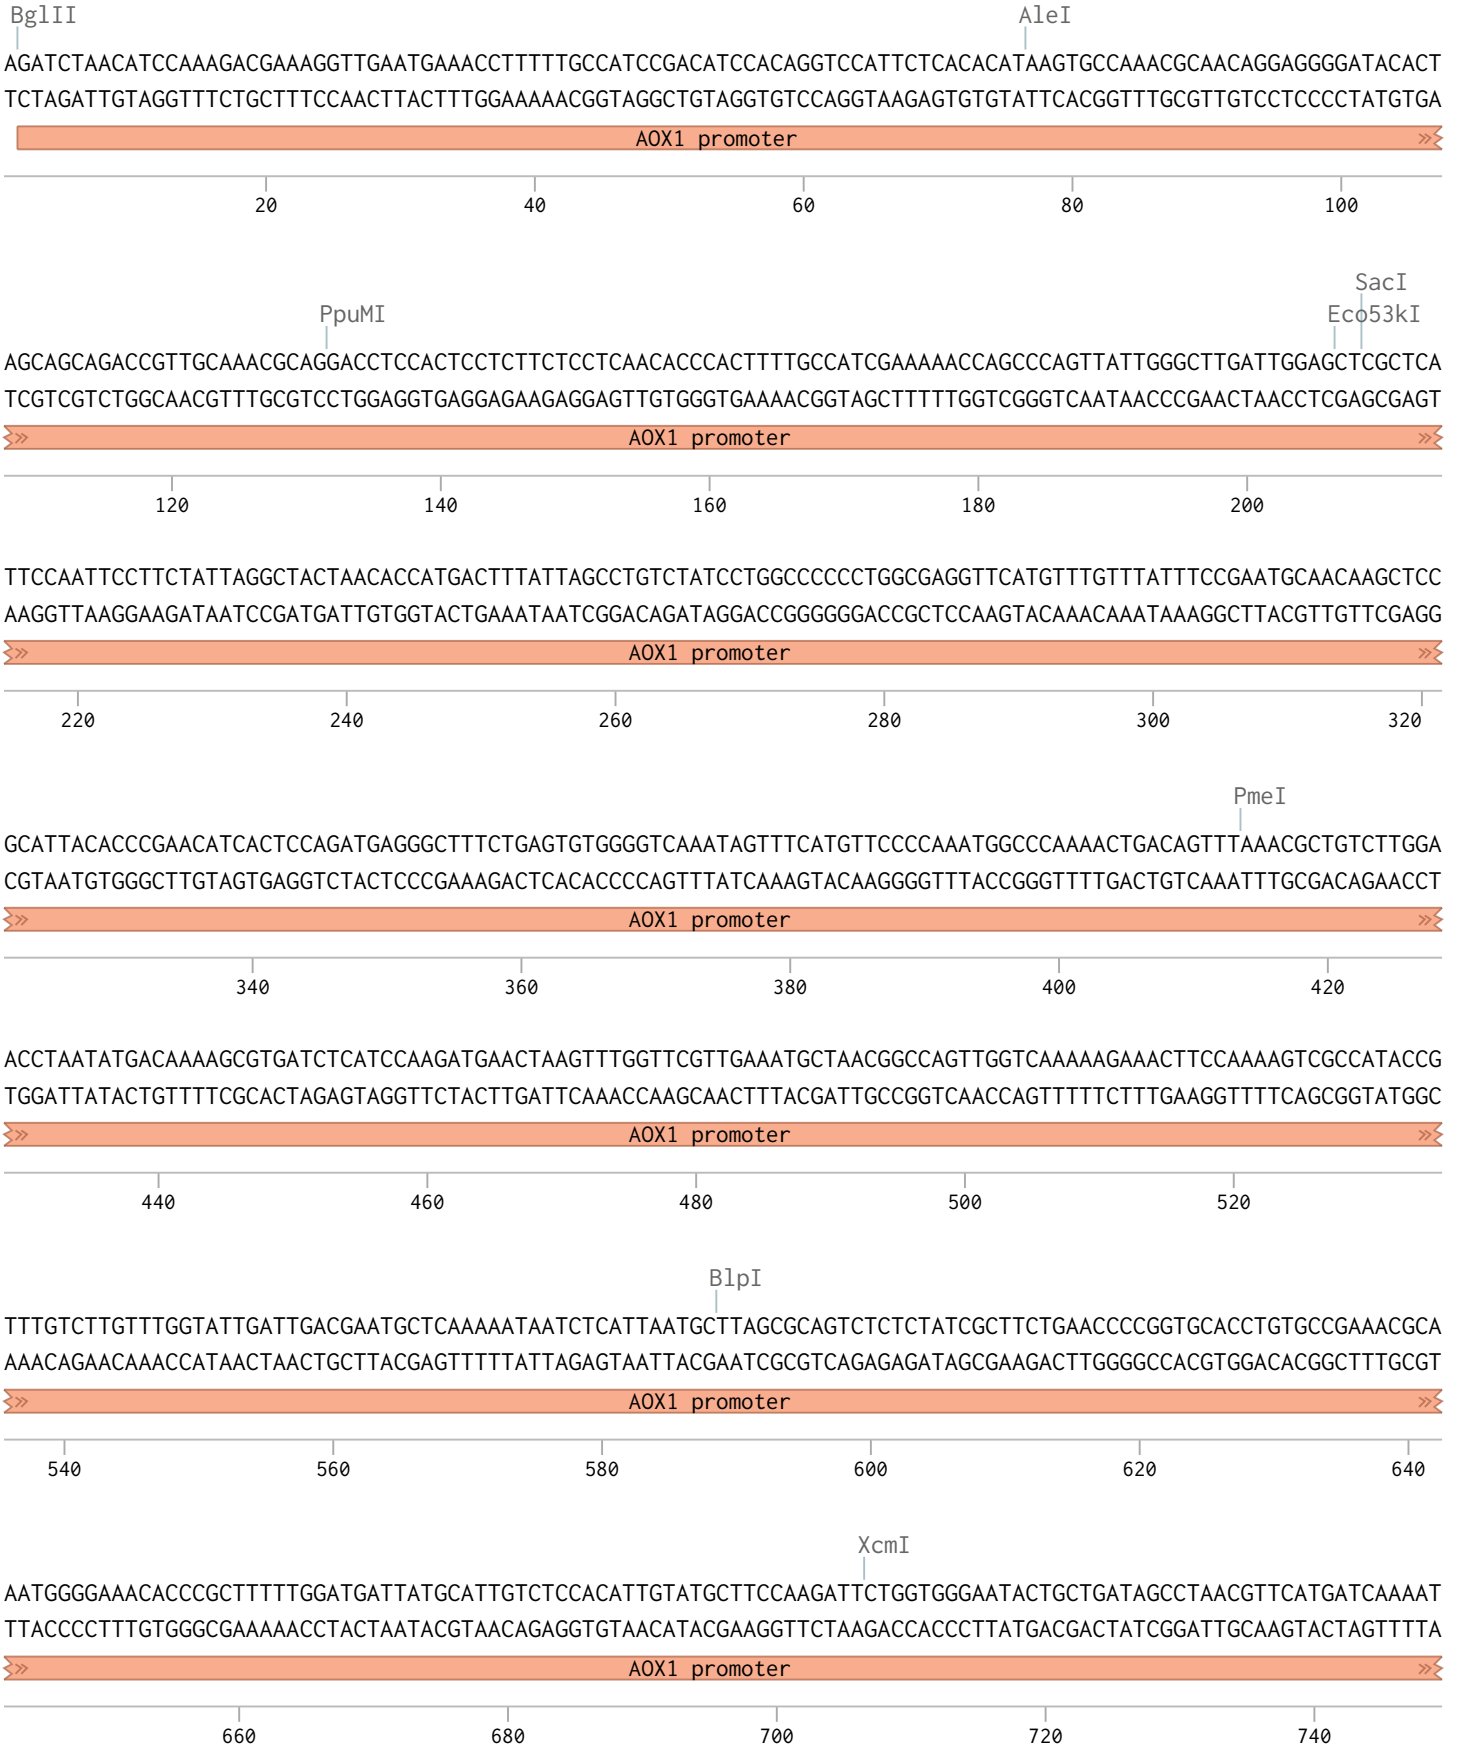



TTAACTGTTCTAACCCCTACTTGACAGCAATATATAACAGAAGGAAGCTGCCCTGTCTTAAACCTTTTTTTTTATCATCATTATTAGCTTACTTTTCATAATTGCGA  
AATTGACAAGATTGGGGATGAACTGTCGTTATATATTTGTCTTCTTCGACGGGACAGAATTTGGAAAAAAAAATAGTAGTAATAATCGAATGAAAGTATTAACGCT

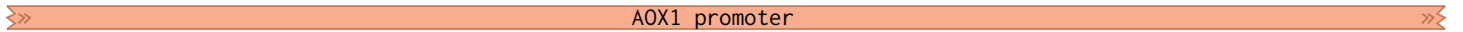

760 780 800 820 840

CTGGTTCCAATTGACAAGCTTTTGGATTTTAAACGACTTTTAAACGACAATTGAGAAGATCAAAAAACAATAATTATTCTGAAGGATCCAACGATGAGATTTCTTCA  
GACCAAGGTTAACTGTTGAAAACTAAAATTGCTGAAAATTGCTGTTGAACTCTTAGTTTTTTGTTGATTAATAAGCTTCTAGTTTTGCTACTCTAAAGGAAGT

BstBI  
BamHI

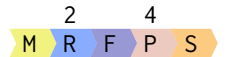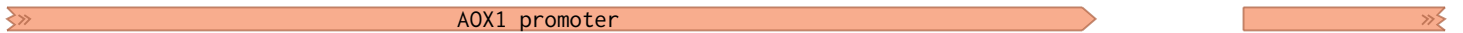

860 880 900 920 940 960

ATTTTACTGCAGTTTTATTTCGAGCATCTCCGATTAGCTGCTCCAGTCAACACTACAACAGAAGATGAAACGGCACAAATCCGGCTGAAGCTGTCATCGGTTA  
TAAAAATGACGTCAAATAAGCGTCGTAGGAGGCGTAATCGACGAGGTCAGTTGTGATGTTGTCTTCTACTTTGCCGTGTTAAGGCCGACTTCGACAGTAGCCAAT

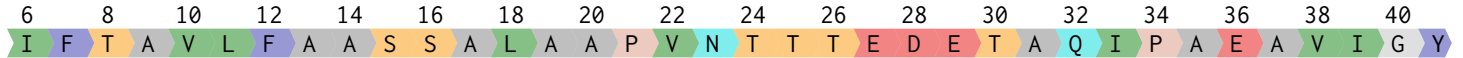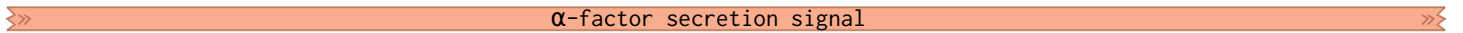

980 1,000 1,020 1,040 1,060

CTCAGATTTAGAAGGGGATTTTCGATGTTGCTGTTTTGCCATTTTCCAACAGCACAAAATAACGGGTTATTGTTTATAAACTACTATTGCCAGCATTGCTGCTAAAG  
GAGTCTAAATCTTCCCTAAAGCTACAACGACAAAACGGTAAAAGGTTGTCGTTTATTGCCAAATAACAAATATTTATGATGATAACGGTCTAACGACGATTTTC

PsiI

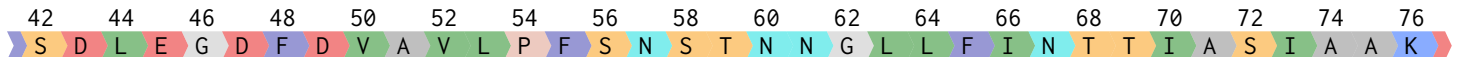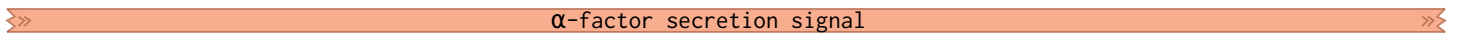

1,080 1,100 1,120 1,140 1,160

AAGAAGGGGTATCTCTCGAGAAAAGAGAGGCTGAAGCTTACGTAGAATTCATGCAGGTTCAATTGGTTGAATCTGGTGGTGCCTTGTTCACCTGGAGGATCACTA  
TTCTTCCCATAGAGAGCTCTTTCTCTCCGACTTCGAATGCATCTTAAGTACGTCCAAGTTAACCACTTAGACCACCACGGGAACAAGTTGGACCTCTAGTGAT

PaeR7I

XhoI

IliI

SnaBI

EcoRI

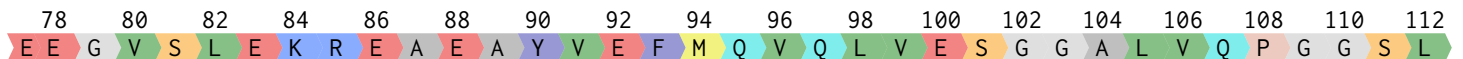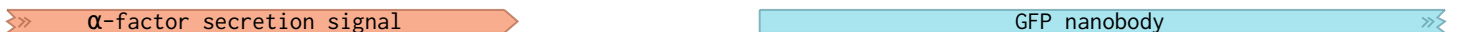

1,180 1,200 1,220 1,240 1,260 1,280



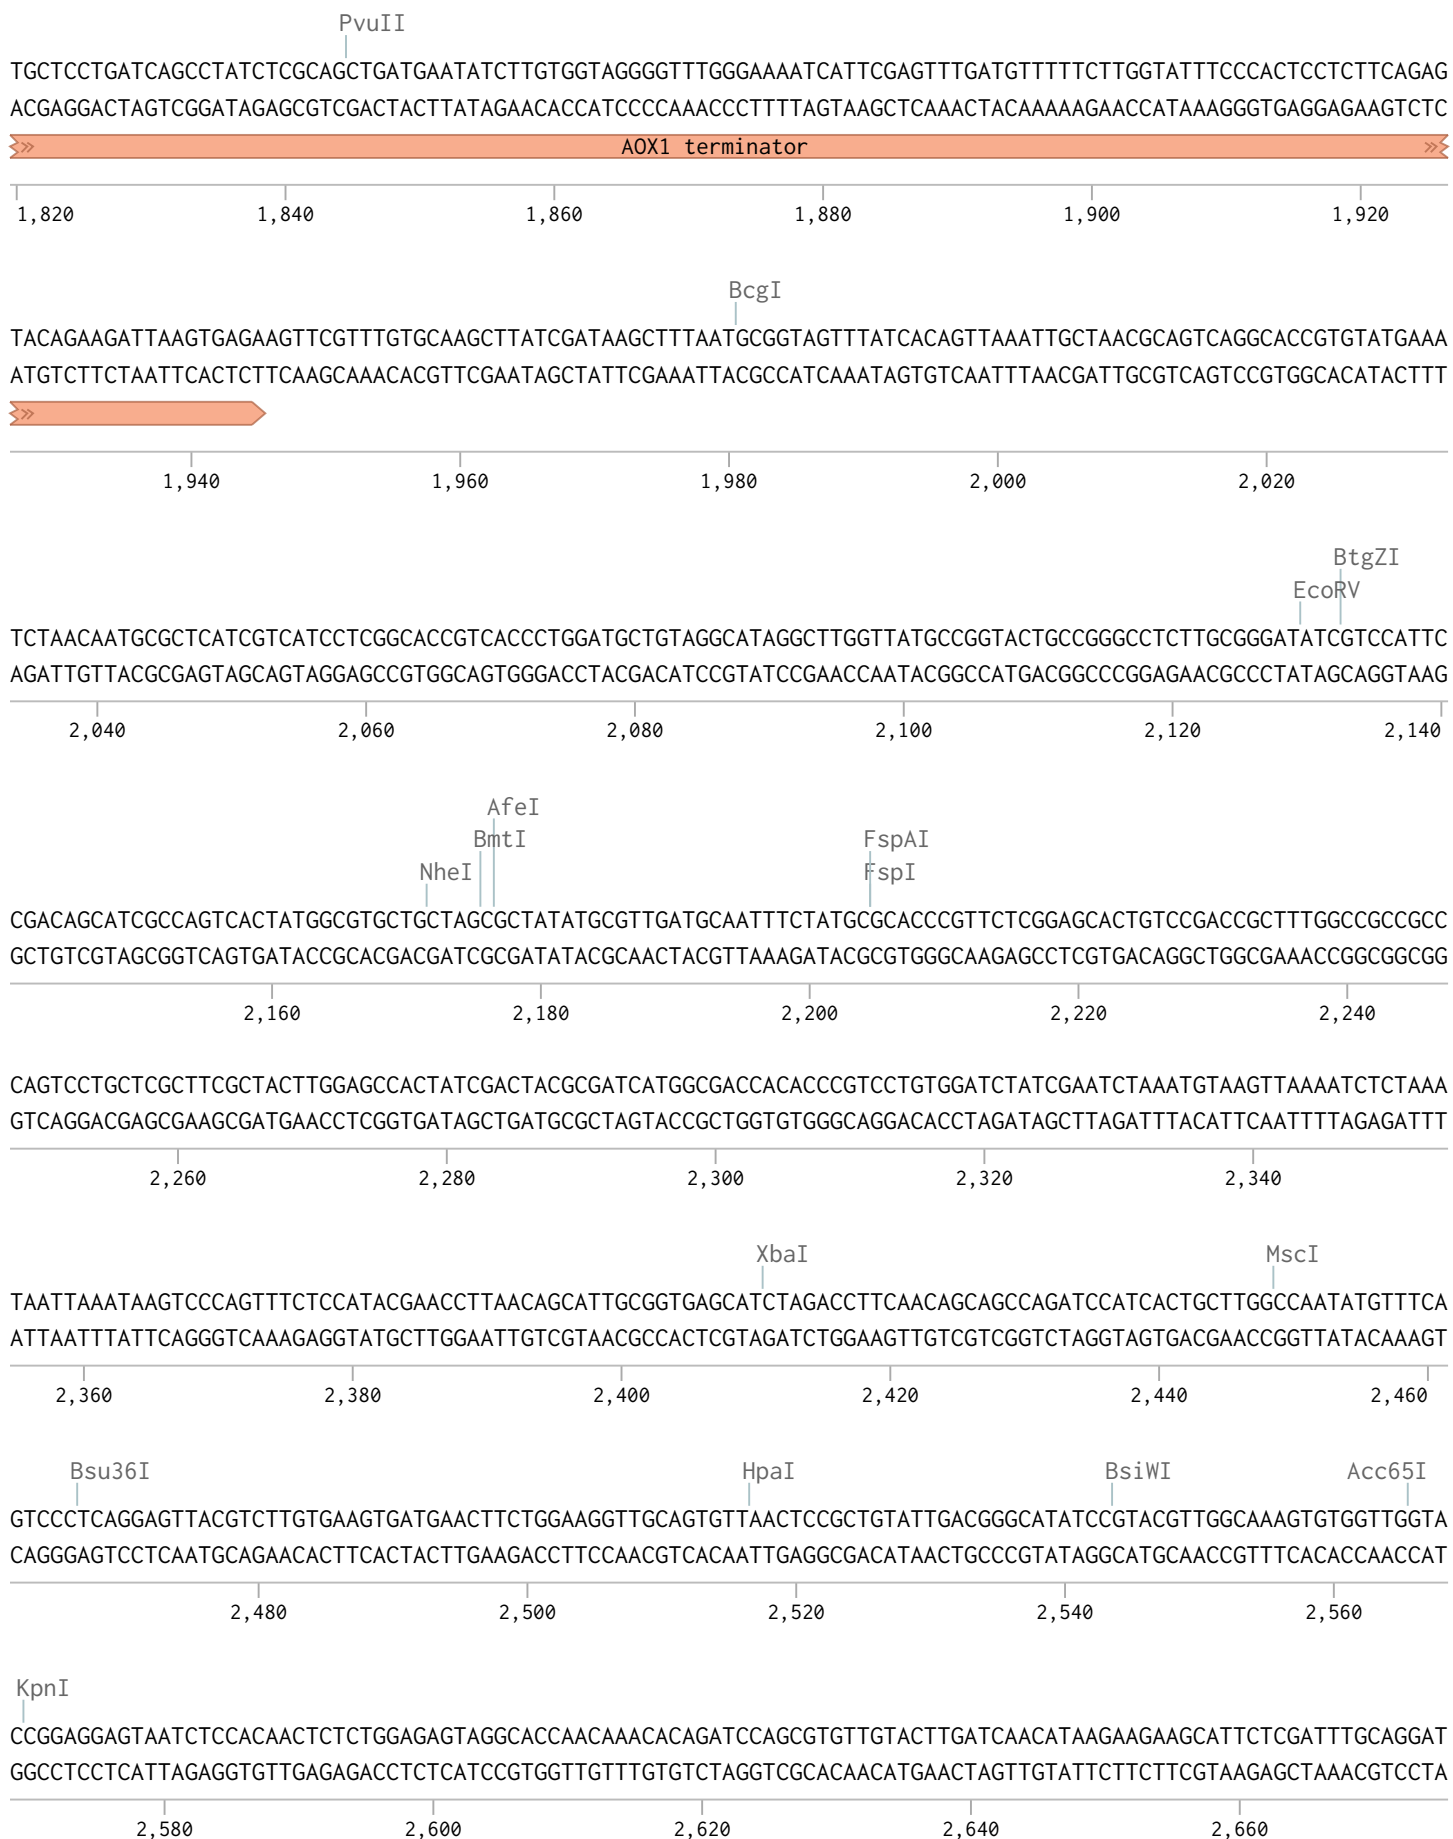

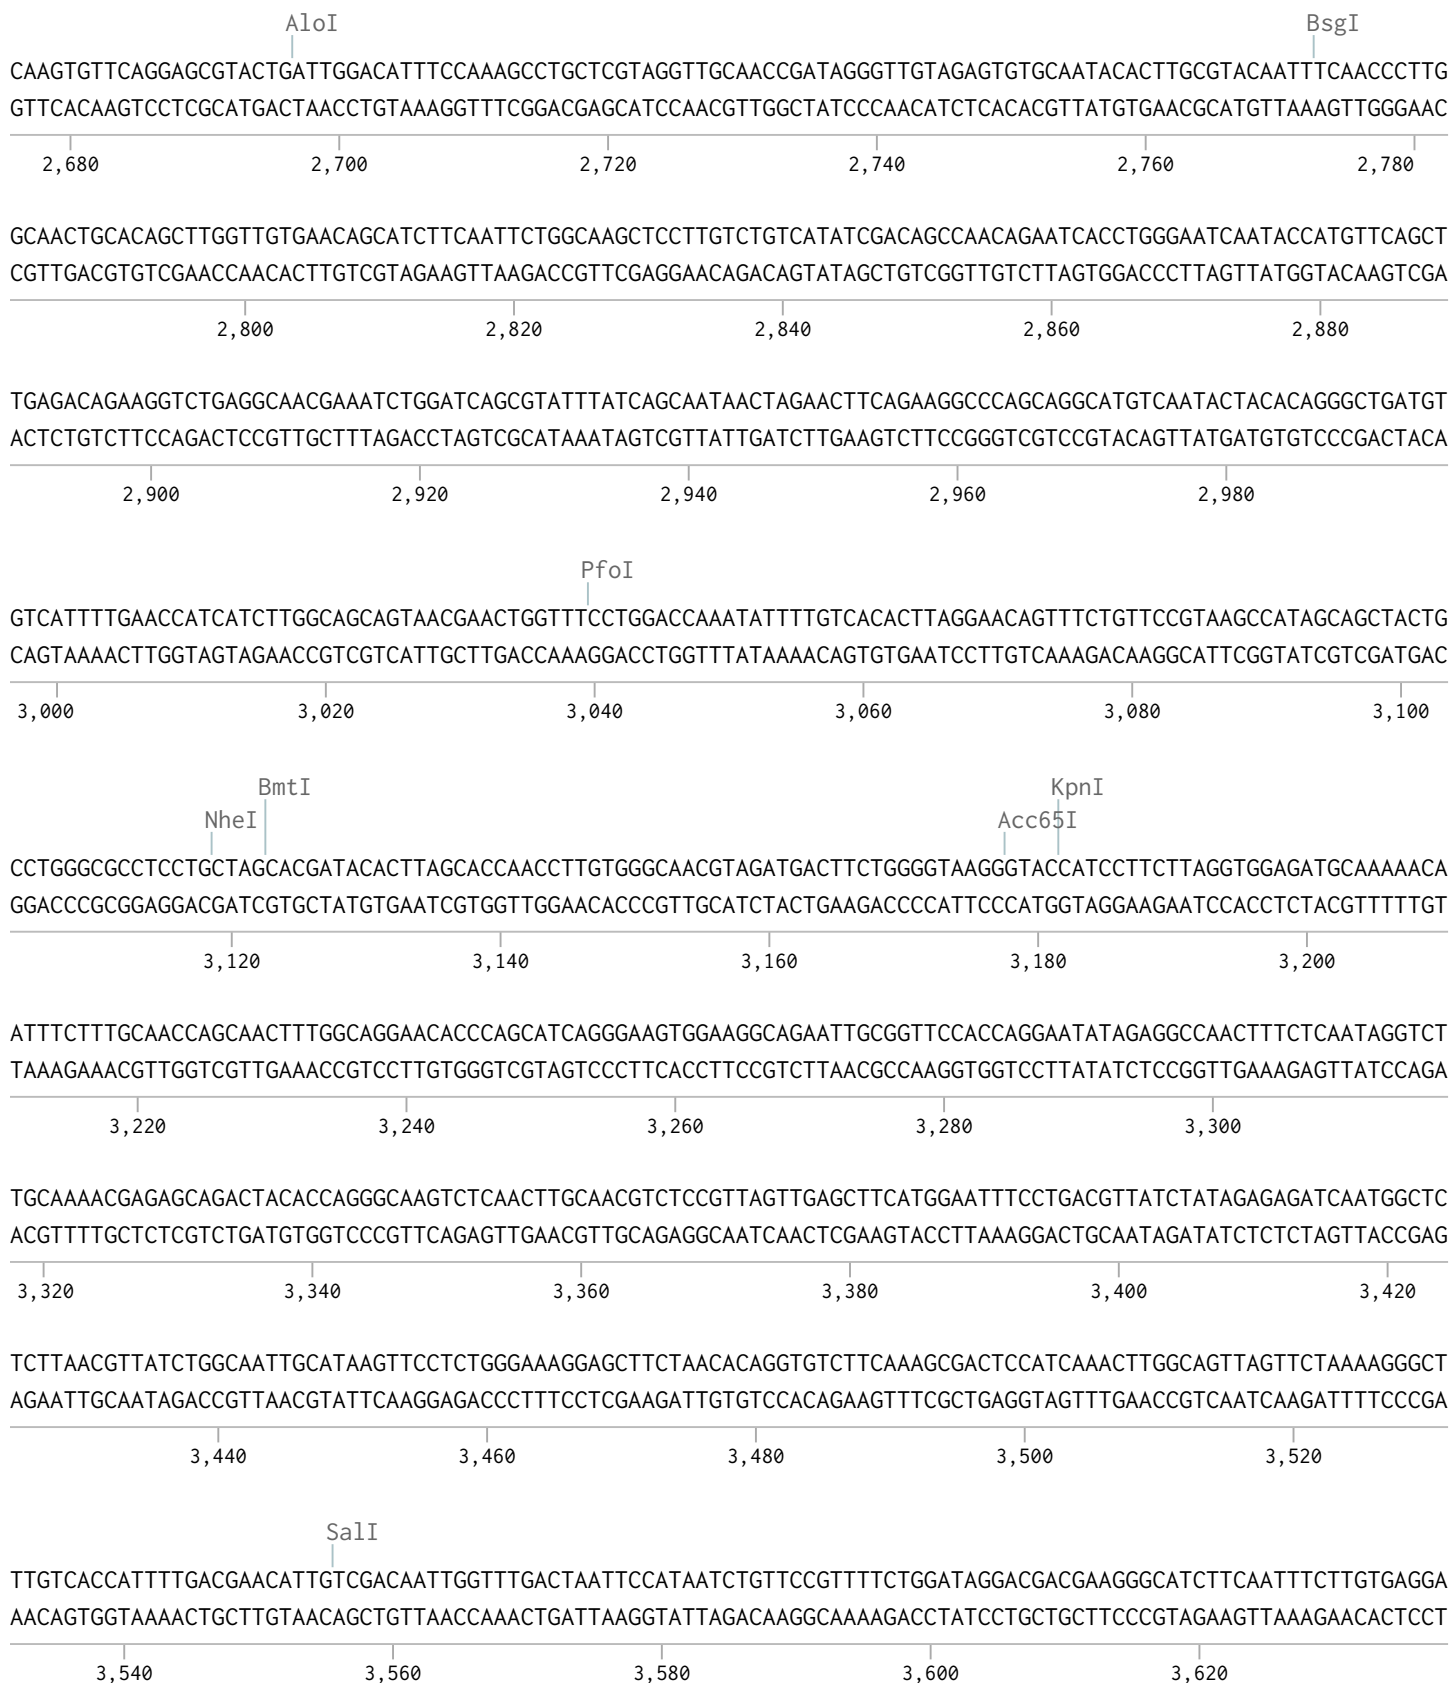

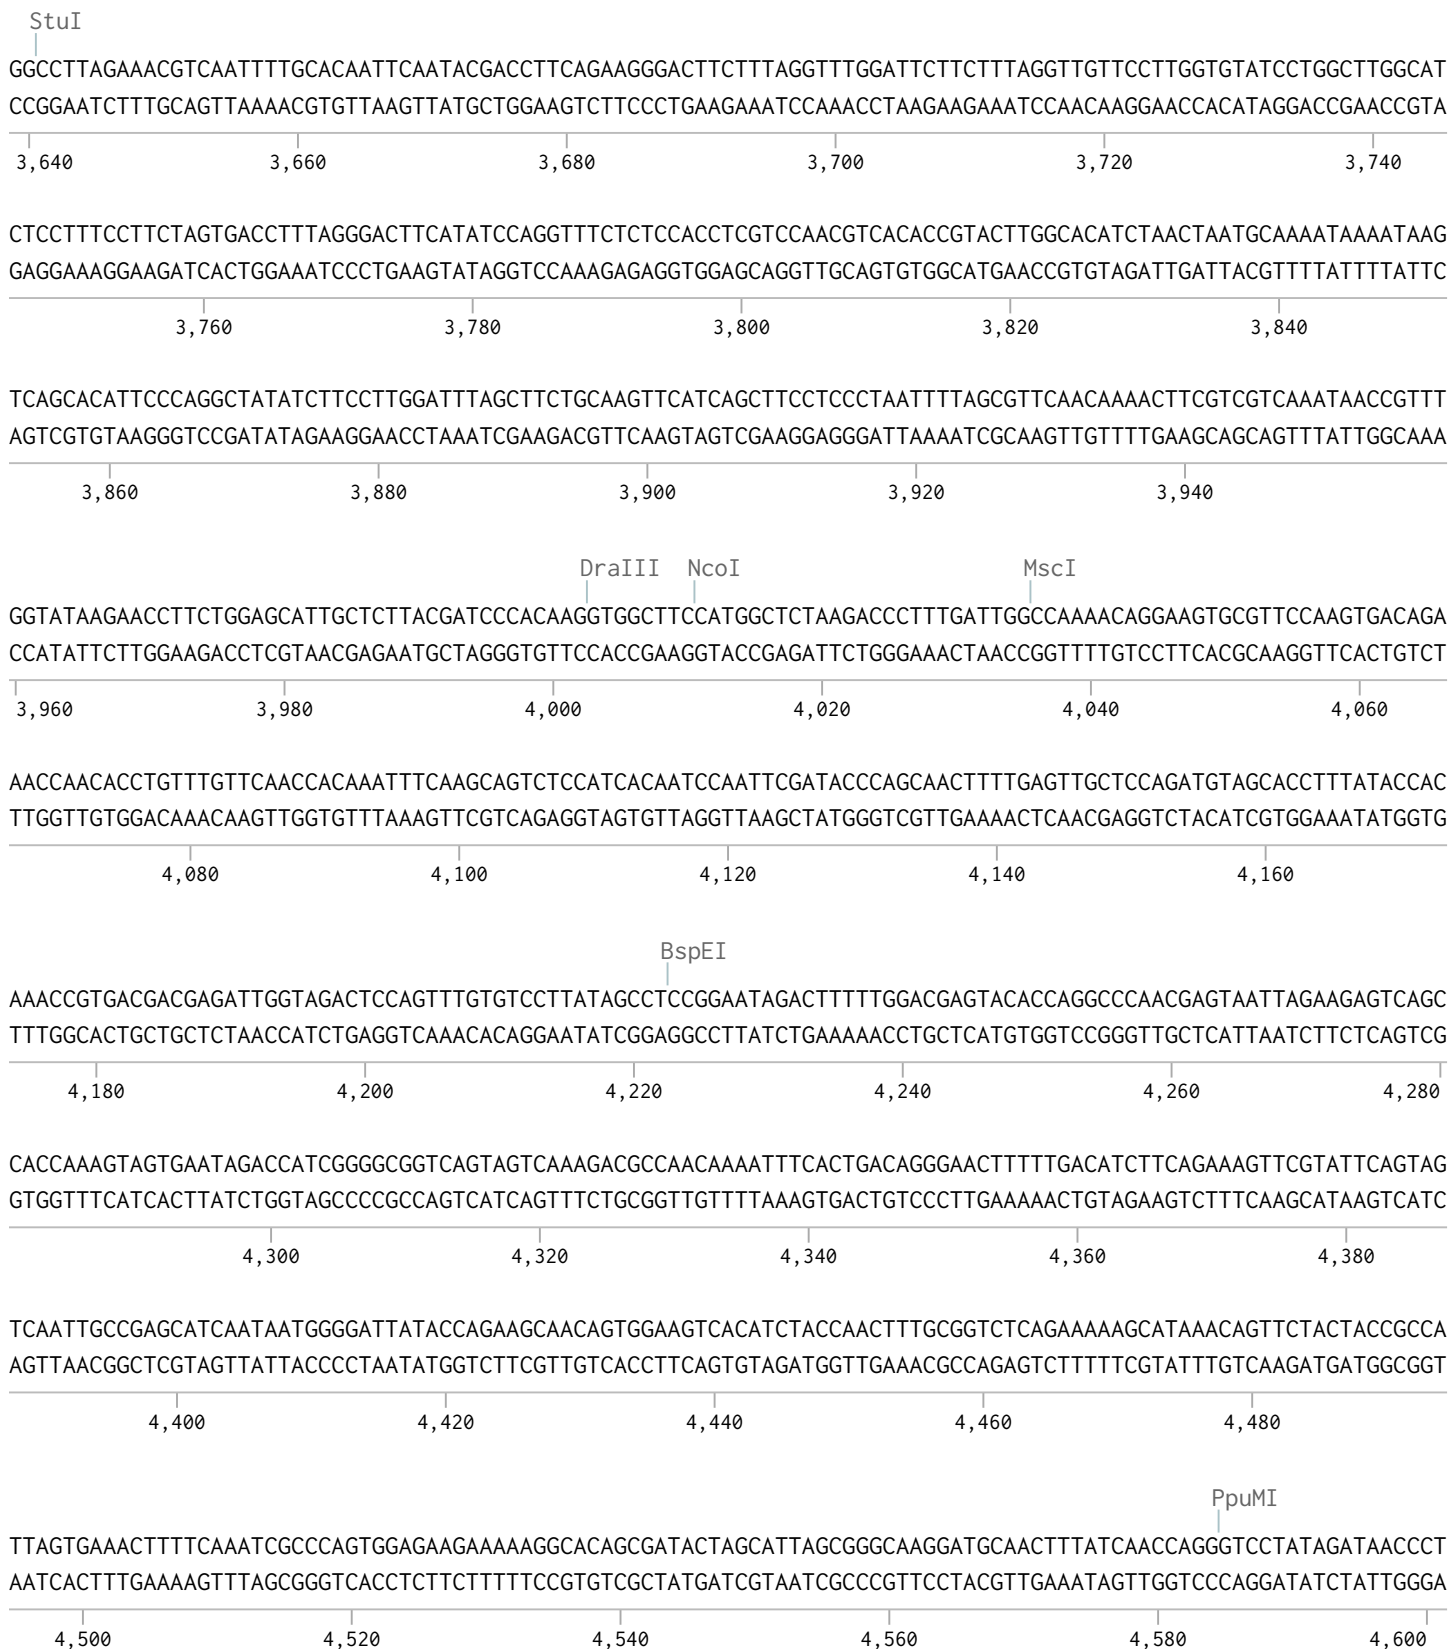

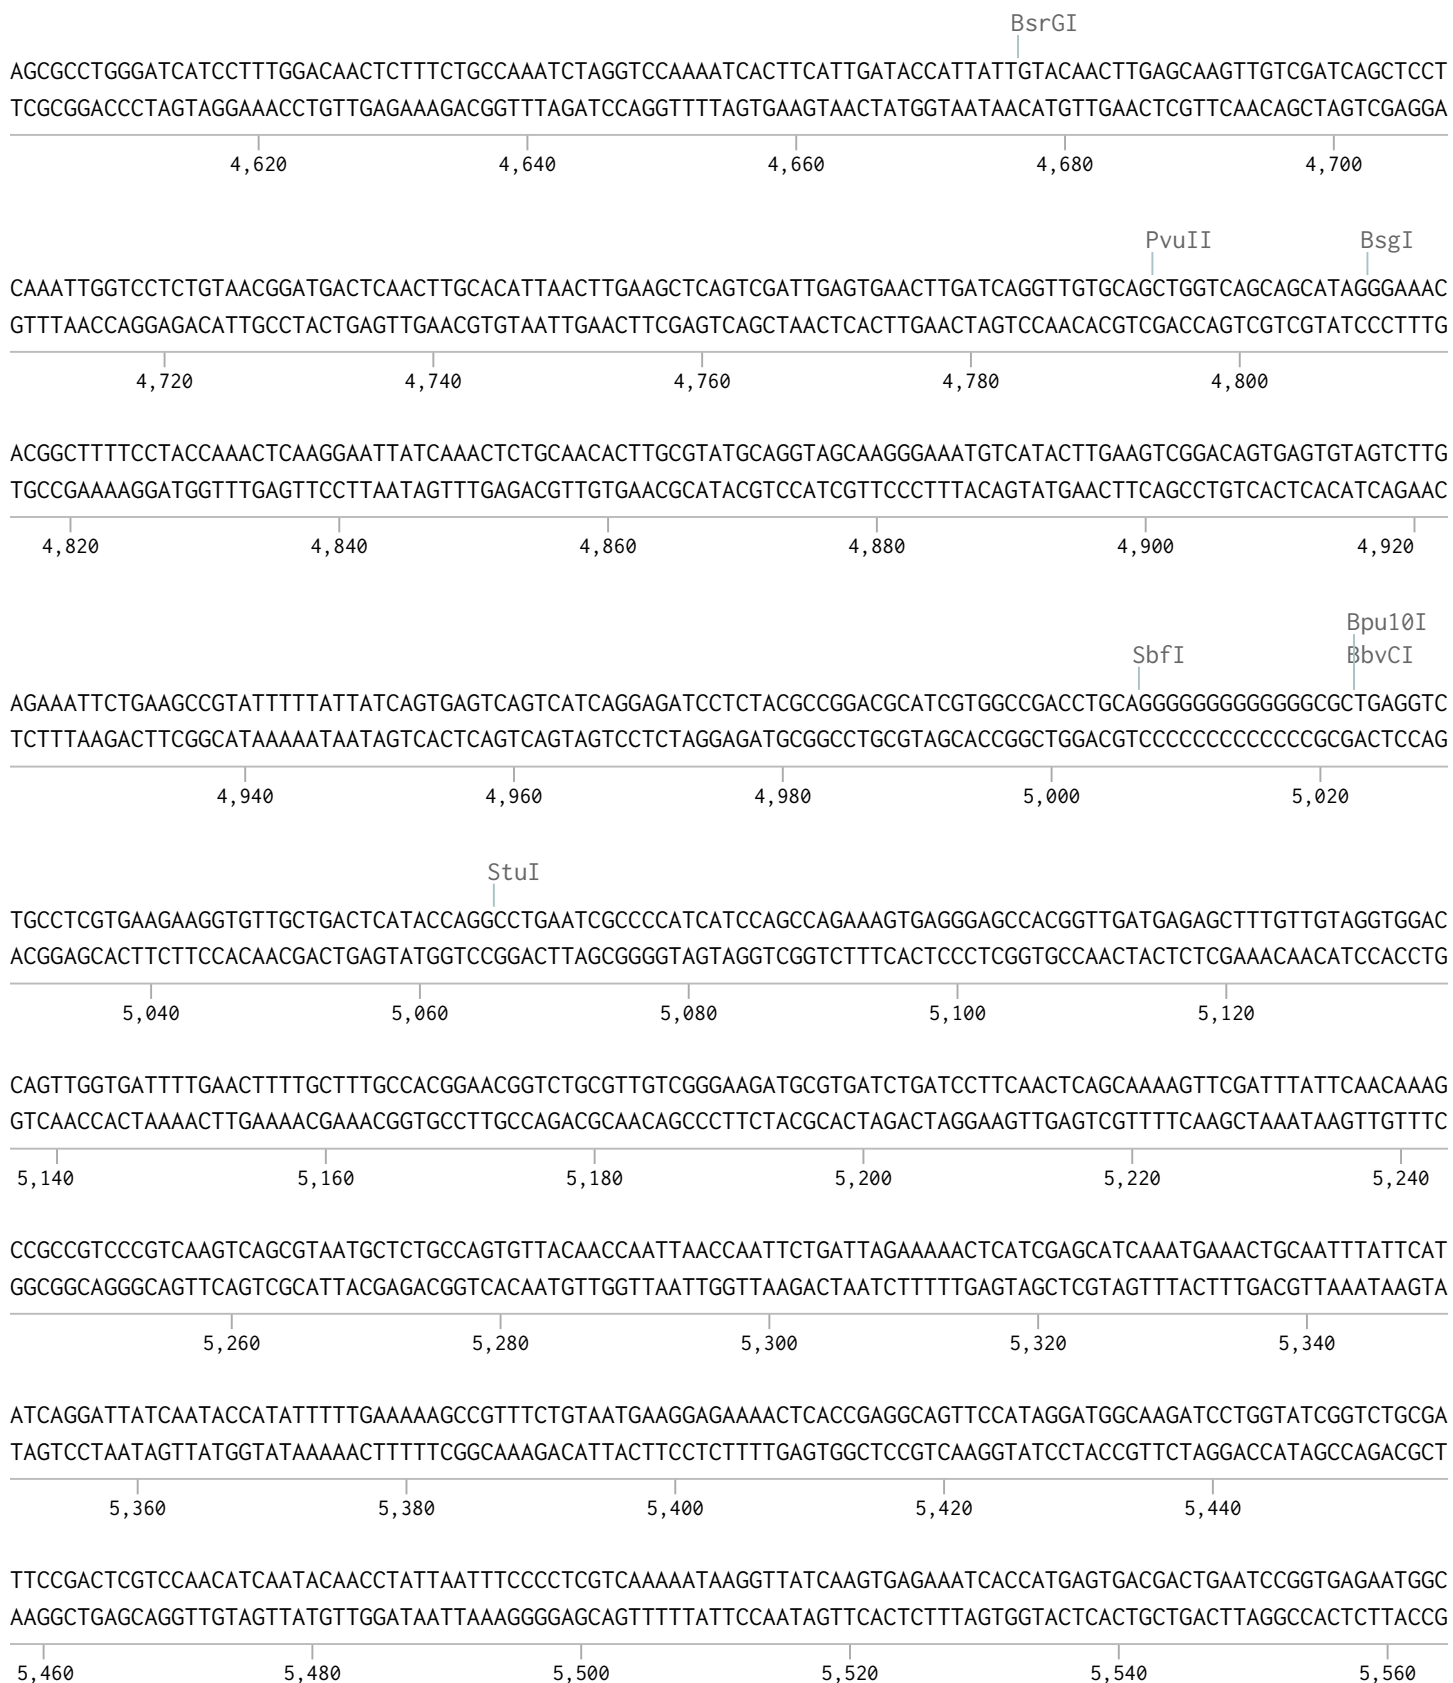

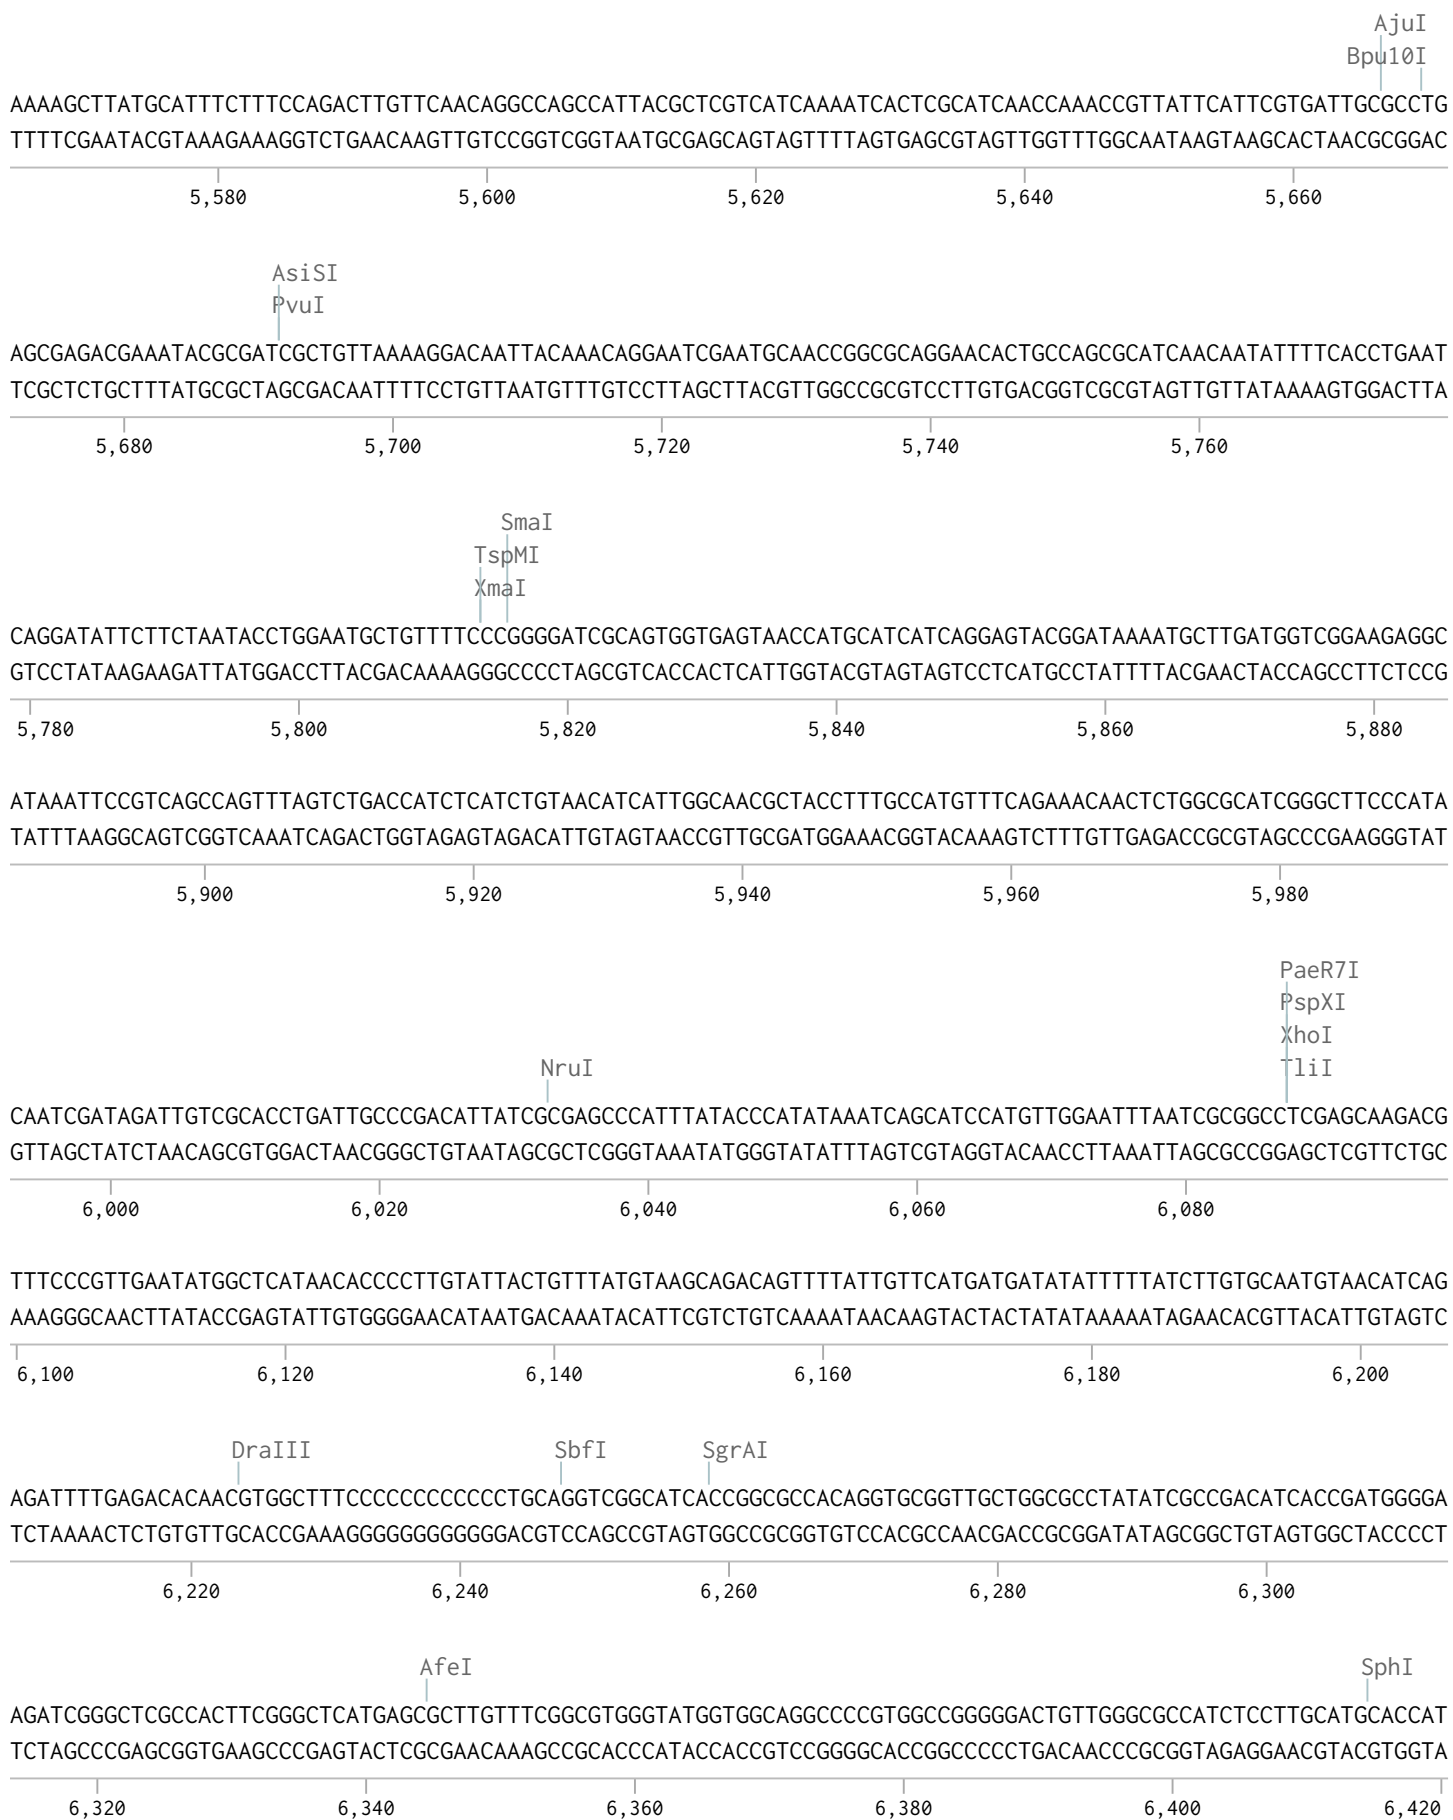

TCCTTGGCGGGCGGTGCTCAACGGCCTCAACCTACTACTGGGCTGCTTCTAATGCAGGAGTCGCATAAGGGAGAGCGTCGAGTATCTATGATTGGAAGTATGGGA  
AGGAAACGCCGCCACGAGTTGCCGGAGTTGGATGATGACCCGACGAAGGATTACGTCCTCAGCGTATTCCTCTCGCAGCTCATAGATACTAACCTTCATACCTT

6,440 6,460 6,480 6,500 6,520

ATGGTGATACCCGCATTCTTCAGTGTCTTGAGGTCTCTATCAGATTATGCCCAACTAAAGCAACCGGAGGAGAGATTTTCATGGTAAATTTCTCTGACTTTTGGTC  
TACCACTATGGGCGTAAAGACTCACAGAACTCCAGAGGATAGTCTAATACGGGTTGATTTTCGTTGGCCTCTCTCTAAAGTACCATTTAAAGAGACTGAAAACCAAG

6,540 6,560 6,580 6,600 6,620

ATCAGTAGACTCGAACTGTGAGACTATCTCGTTATGACAGCAGAAATGTCCTTCTTGAGACAGTAAATGAAGTCCCACCAATAAAGAAATCCTTGTATCAGGAA  
TAGTCATCTGAGCTTGACACTCTGATAGAGCCAATACTGTCGTCTTTACAGGAAGAACCCTGTGCATTTACTTCAGGGTGGTTATTTCTTTAGGAACAATAGTCCTT

6,640 6,660 6,680 6,700 6,720 6,740

BstBI

CAAACCTCTGTTTCGAACTTTTTCGGTGCCTTGAACATAAAAATGTAGAGTGGATATGTCGGGTAGGAATGGAGCGGGCAAATGCTTACCTTCTGGACCTTCAAGA  
GTTTGAAGAACAAAGCTTGA AAAAGCCACGGAACCTTGATATTTTACATCTCACCTATACAGCCATCCTTACCTCGCCCGTTTACGAATGGAAGACCTGGAAGTTCT

6,760 6,780 6,800 6,820 6,840

GGTATGTAGGGTTTGTAGATACTGATGCCAACTCAGTGACAACGTTGCTATTTCTGTTCAAACCATTCGAAATCCAGAGAAATCAAAGTTGTTGTCTACTATTGAT  
CCATACATCCCAAACATCTATGACTACGGTTGAAGTCACTGTTGCAACGATAAAGCAAGTTTGGTAAGGCTTAGGTCTCTTTAGTTTCAACAAACAGATGATAACTA

6,860 6,880 6,900 6,920 6,940

CCAAGCCAGTGCGGTCTTGAACCTGACAATAGTGTCTCGTGTGTTTGGAGTCACTTTGTATGAATAAATCTAGTCTTTGATCTAAATAATCTTGACGAGCCAAGGC  
GGTTCGGTCACGCCAGAACTTTGACTGTTATCACACGAGCACAAAACCTCCAGTAGAAACATACTTATTTAGATCAGAAACTAGATTTATTAGAACTGCTCGGTTCCG

6,960 6,980 7,000 7,020 7,040 7,060

GATAAATACCCAAATCTAAAACCTTTTTAAAACGTTAAAAGGACAAGTATGTCTGCCTGTATTAACCCCAAATCAGCTCGTAGTCTGATCCTCATCAACTTGAGGG  
CTATTTATGGGTTTATAGATTTTGGAGAAAATTTTGCATTTTCTGTTTCATACAGACGGACATAATTTGGGGTTTAGTCGAGCATCAGACTAGGAGTAGTTGAACTCC

7,080 7,100 7,120 7,140 7,160

EcoRV

BglII

GCACTATCTGTTTTAGAGAAATTTGCGGAGATGCGATATCGAGAAAAAGGTACGCTGATTTTAAACGTGAAATTTATCTCAAGATCTCTGCCTCGCGGTTTTCGGT  
CGTGATAGAACAAAATCTCTTTAAACGCCTCTACGCTATAGCTCTTTTTCCATGCGACTAAAATTTGCACTTTAAATAGAGTTCTAGAGACGGAGCGCAAGCCA

7,180 7,200 7,220 7,240 7,260

PfoI

GATGACGGTGAAAACCTCTGACACATGCAGCTCCCGGAGACGGTCACAGCTTGTCTGTAAGCGGATGCCGGGAGCAGACAAGCCCGTCAGGGCGCGTCAGCGGGTGT  
CTACTGCCACTTTTGGAGACTGTGTACGTCGAGGGCCTCTGCCAGTGTGCAACAGACATTGCGCTACGGCCCTCGTCTGTTTCGGGCAGTCCCGCGCAGTCGCCACA

7,280 7,300 7,320 7,340 7,360 7,380

Tth111I

Pf1FI

BstZ17I

NdeI

TGGCGGGTGTGGGGGCGCAGCCATGACCCAGTCACTGAGGATAGCGGAGTGTATACTGGCTTAACTATGCGGCATCAGAGCAGATTGTAAGTACTGAGAGTGCACCATAT  
ACCGCCACAGCCCCGCGTGGTACTGGTCACTGAGTGCATCGCTCACATATGACCGAATTGATACGCCGTAGTCTCGTCTAACATGACTCTCACGTTGGTATA

7,400 7,420 7,440 7,460 7,480



BspQI  
SapI

GCGGTGTGAAATACCGCACAGATGCGTAAGGAGAAAATACCGCATCAGGCGCTCTTCCGCTTCTCTCGCTCACTGACTCGCTGCGCTCGGTCGTTCCGCTGCGGCGAG  
CGCCACACTTTATGGCGTGTCTACGCATTCTCTTTTATGGCGTAGTCCGCGAGAAGGCGAAGGAGCGAGTGACTGAGCGACGCGAGCCAGCAAGCCGACGCCGCTC

7,500

7,520

7,540

7,560

7,580

AflIII  
PciI

CGGTATCAGCTCACTCAAAGGCGTAATACGTTATCCACAGAATCAGGGGATAACGCAGAAAGAACATGTGAGCAAAGGCCAGCAAAGGCCAGGAACCGTAAA  
GCCATAGTCGAGTGAGTTTCCGCCATTATGCCAATAGGTGTCTTAGTCCCCTATTGCGTCCTTTCTGTACTCTGTTTTCCGGTCGTTTTCCGGTCTTGGCATT

7,600

7,620

7,640

7,660

7,680

7,700

AAGGCCGCTTGCTGGCGTTTTTCCATAGGCTCCGCCCCCTGACGAGCATCACAAAATCGACGCTCAAGTCAGAGGTGGCGAAACCCGACAGGACTATAAAGATA  
TTCCGGCGCAACGACCGCAAAAAGGTATCCGAGGCGGGGGACTGCTCGTAGTGTTTTTAGTGCAGTTTCACTCTCCACCGCTTTGGGCTGTCCTGATTTCTAT

ColE1 origin

7,720

7,740

7,760

7,780

7,800

CCAGGCGTTTTCCCTGGAAGCTCCCTCGTGCCTCTCCTGTTCCGACCTGCCGCTTACCGGATACCTGTCCGCTTTCTCCCTTCGGAAGCGTGGCGCTTTCTC  
GGTCCGCAAAGGGGACCTTCGAGGAGCACGCGAGAGGACAAGGCTGGGACGCGAATGCCTATGGACAGCGGAAAGAGGGAAGCCCTTCGCACCGCGAAAGAG

ColE1 origin

7,820

7,840

7,860

7,880

7,900

AATGCTCACGCTGTAGGTATCTCAGTTCGGTGTAGGTGCTCGCTCCAAGCTGGGCTGTGTGCACGAACCCCCGTTACGCCGACCGTGCCTTATCCGGTAAC  
TTACGAGTGCACATCCATAGAGTCAAGCCACATCCAGCAAGCGAGTTTCGACCCGACACACGTGCTTGGGGGCAAGTCCGGCTGGCGACGCGGAATAGGCCATTG

ColE1 origin

7,920

7,940

7,960

7,980

8,000

8,020

TATCGTCTTGAGTCCAACCCGTAAGACACGACTTATCGCCACTGGCAGCAGCCACTGGTAACAGGATTAGCAGAGCGAGGTATGTAGGCGGTGCTACAGAGTTCTT  
ATAGCAGAACTCAGGTTGGGCCATTCTGTGCTGAATAGCGGTGACCGTCGTCGGTGACCATTGTCCTAATCGTCTCGCTCCATACATCCGCCACGATGCTCAAGAA

ColE1 origin

8,040

8,060

8,080

8,100

8,120

GAAGTGGTGGCCTAACTACGGCTACACTAGAAGGACAGTATTTGGTATCTGCGCTCTGCTGAAGCCAGTTACCTTCGAAAAAGAGTTGGTAGCTCTTGATCCGGCA  
CTTACCACCGGATTGATGCCGATGTGATCTTCTGTGCATAAACCATAGACGCGAGACGACTTCGGTCAATGGAAGCCTTTTTCTCAACCATCGAGAACTAGGCCGT

ColE1 origin

8,140

8,160

8,180

8,200

8,220

AACAAACCACCGCTGGTAGCGGTGGTTTTTTGTTTGAAGCAGCAGATTACGCGCAGAAAAAAGGATCTCAAGAAGATCCTTTGATCTTTTCTACGGGTCTGAC  
TTGTTTGGTGGCACCATCGCCACCAAAAAACAACGTTGTCGTCCTAATGCGCTCTTTTTTCTAGAGTTCTTCTAGAACTAGAAAAGATGCCCCAGACTG

ColE1 origin

8,240

8,260

8,280

8,300

8,320

8,340

GCTCAGTGAACGAAAACCTCACGTTAAGGGATTTTGGTCATGAGATTATCAAAAAGGATCTTCACCTAGATCCTTTTAAATTAATAAATGAAGTTTTAAATCAATCTA  
CGAGTCACCTTGCTTTTGGAGTGAATCCCTAAAACCACTACTCTAATAGTTTTCTAGAAAGTGGATCTAGGAAAATTTAATTTTTACTTCAAAAATTTAGTTAGAT

ColE1 origin

8,360 8,380 8,400 8,420 8,440

AAGTATATATGAGTAAACTTGGTCTGACAGTTACCAATGCTTAATCAGTGAGGCACCTATCTCAGCGATCTGTCTATTTTCGTTCCATCCATAGTTGCCTGACTCCCCG  
TTCATATATACTCATTGAACCACTGTCAATGGTTACGAATTAGTCACTCCGTGGATAGAGTCGCTAGACAGATAAAGCAAGTAGGTATCAACGGACTGAGGGC

AmpR

8,460 8,480 8,500 8,520 8,540 8,560

TCGTGTAGATAACTACGATACGGGAGGGCTTACCATCTGGCCCCAGTCTGCAATGATACCGCGAGACCCACGCTCACCGGCTCCAGATTTATCAGCAATAAACCAG  
AGCACATCTATTGATGCTATGCCCTCCGAATGGTAGACCGGGTACGACGTTACTATGGCGCTCTGGTGCGAGTGGCCGAGGTCTAAATAGTCGTTATTTGGTC

AmpR

8,580 8,600 8,620 8,640 8,660

CCAGCCGGAAGGGCCGAGCGCAGAAGTGGTCTGCAACTTTATCCGCCTCCATCCAGTCTATTAATTGTTGCCGGAAGCTAGAGTAAGTAGTTCGCCAGTTAATAG  
GGTCGCTTCCCGCTCGCGTCTTACCAGGACGTTGAAATAGGCGGAGGTAGGTCAGATAATTAACAACGGCCCTTCGATCTCATTATCAAGCGGTCAATTATC

AmpR

8,680 8,700 8,720 8,740 8,760

FspI

TTTGCGCAACGTTGTTGCCATTGCTGCAGGCATCGTGGTGTACGCTCGTCGTTTGGTATGGCTTCATTAGCTCCGGTTCCCAACGATCAAGGCGAGTTACATGAT  
AAACGCGTTGCAACAACGGTAACGACGTCCTAGCACCACAGTGCAGCAGCAAAACCATACCGAAGTAAGTCGAGGCCAAGGGTTGCTAGTTCCGCTCAATGTACTA

AmpR

8,780 8,800 8,820 8,840 8,860 8,880

PvuI

CCCCATGTTGTGCAAAAAGCGGTTAGCTCCTTCGGTCCCGATCGTTGTGAGAAGTAAGTTGGCCGAGTGTATCACTCATGGTTATGGCAGCACTGCATAAT  
GGGGGTACAACACGTTTTTCGCCAATCGAGGAAGCCAGGAGGCTAGCAACAGTCTTCATTCAACCGCGTCACAATAGTGAGTACCAATACCGTCGTGACGTATTA

AmpR

8,900 8,920 8,940 8,960 8,980

ScaI

BcgI

TCTCTTACTGTATGCCATCCGTAAGATGCTTTTCTGTGACTGGTGAAGTACTCAACCAAGTCAATCTGAGAAATAGTGTATGCGGCGACCGAGTTGCTCTTGCCCGC  
AGAGAATGACAGTACGGTAGGCATTCTACGAAAAGACACTGACCACTCATGAGTTGGTTCAGTAAGACTCTTATCACATACGCCCTGGCTCAACGAGAACGGGCCG

AmpR

9,000 9,020 9,040 9,060 9,080

GTCAACACGGGATAATACCGGCCACATAGCAGAAGTTTAAAAGTGTCTATCATTGAAAACGTTCTTCGGGGCGAAAACCTCTCAAGGATCTTACCGCTGTTGAGAT  
CAGTTGTGCCCTATTATGGCGCGGTGATCGTCTTGAATTTTACGAGTAGTAACCTTTTGAAGAAGCCCGCTTTTGGAGAGTTCTAGAAATGGCGACAACCTA

AmpR

9,100 9,120 9,140 9,160 9,180 9,200

CCAGTTCGATGTAACCCACTCGTGCACCCAAGTATCTTCAGCATCTTTACTTTCCACCAGCGTTTCTGGGTGAGCAAAAACAGGAAGGCAAAATGCCGCAAAAAG  
GGTCAAGCTACATTGGGTGAGCACGTGGGTTGACTAGAAGTCGTAGAAAATGAAAGTGGTCGAAAGACCCACTCGTTTTTGCCTTCCGTTTTACGGCGTTTTTTC

9,220

9,240

9,260

9,280

9,300

GGAATAAGGGCGACACGGAAATGTTGAATACTCATACTCTTCTTTTTCAATATTATTGAAGCATTATCAGGGTATTGTCTCATGAGCGGATACATATTTGAATG  
CCTTATCCCGCTGTGCCTTTACAACCTTATGAGTATGAGAAGGAAAAAGTTATAATAACTTCGTAATAAGTCCCAATAACAGAGTACTCGCCTATGTATAAATTAC

9,320

9,340

9,360

9,380

9,400

AatII

ZraI

TATTTAGAAAAATAAACAAATAGGGGTTCCGCGCACATTTCCCGAAAAGTGCCACCTGACGTCTAAGAAACCATTATTATCATGACATTAACCTATAAAAAATAGGC  
ATAAATCTTTTTATTTGTTTATCCCAAGGCGCGTGAAGGGGCTTTTCACGGTGGACTGCAGATTCTTTGGTAATAATAGTACTGTAATTGGATATTTTTATCCG

9,420

9,440

9,460

9,480

9,500

9,520

GTATCAGGAGGCCCTTTCGTCTTCAAGAATTAATTCTCATGTTTGACAGCTTATCATCGATAAGCTGACTCATGTTGGTATTGTGAAATAGACGCAGATCGGGAACA  
CATAGTGCTCCGGAAAGCAGAAGTTCTTAATTAAGAGTACAACTGTGCAATAGTAGCTATTCGACTGAGTACAACCATAACTTTATCTGCGTCTAGCCCTTGT

9,540

9,560

9,580

9,600

9,620

CTGAAAAATAACAGTTATTATTCG  
GACTTTTTATTGTCAATAATAAGC

9,640

9,650

# Anti-GFP-FLAG-Barcode2 (9696 bp)



TTAACTGTTCTAACCCTACTTGACAGCAATATATAAACAGAAGGAAGCTGCCCTGTCTTAAACCTTTTTTTTTATCATCATTATTAGCTTACTTTTCATAATTGCGA  
AATTGACAAGATTGGGGATGAACTGTCGTTATATATTTGTCTTCTTCGACGGGACAGAATTTGGAAAAAAAAATAGTAGTAATAATCGAATGAAAGTATTAACGCT

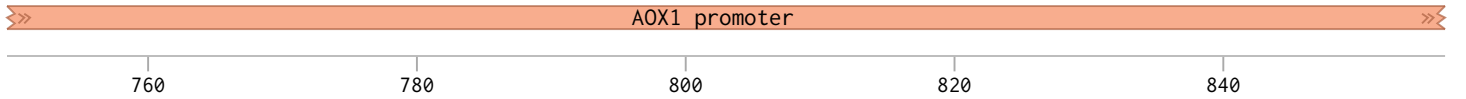

CTGTTCCAATTGACAAGCTTTTGGATTTTAAAGACTTTTAAAGCAACTTGAGAAGATCAAAAAACAATAATTATTGGAAGGATCCAACGATGAGATTTCTTCA  
GACCAAGGTTAACTGTTGAAAACTAAAATTGCTGAAAATTGCTGTTGAACTCTTAGTTTTTTGTTGATTAATAAGCTTCTAGTTTTGCTACTCTAAAGGAAGT

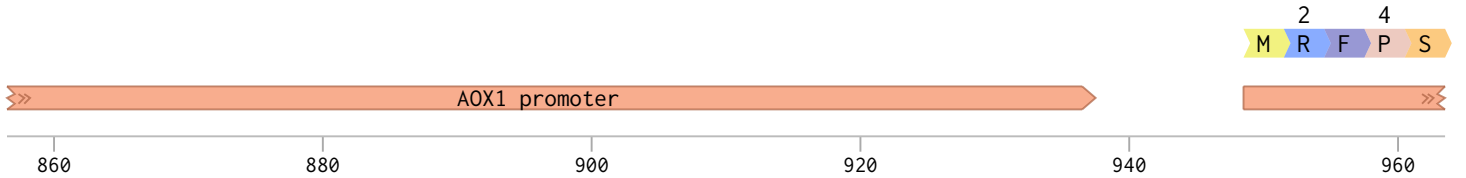

ATTTTTACTGCAGTTTTATTTCGAGCATCTCCGCATTAGCTGCTCCAGTCAACACTACAACAGAAGATGAAACGGCACAAATTCGGCTGAAGCTGTCATCGGTTA  
TAAAAATGACGTCAAATAAGCGTCGTAGGAGGCGTAATCGACGAGGTCAGTTGTGATGTTGTCTTCTACTTTGCCGTGTTAAGGCCGACTTCGACAGTAGCCAAT

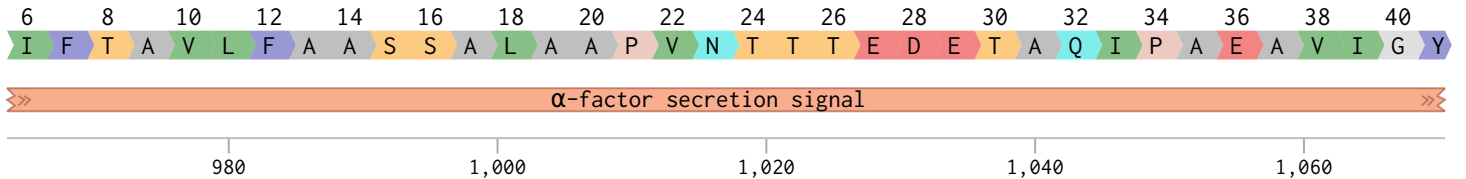

CTCAGATTTAGAAGGGGATTTTCGATGTTGCTGTTTTGCCATTTTCCAACAGCACAAATAACGGGTTATTGTTTATAAACTACTATTGCCAGCATTGCTGCTAAAG  
GAGTCTAAATCTTCCCTAAAGCTACAACGACAAAACGGTAAAAGGTTGTCGTTTATTGCCAATAACAAATATTTATGATGATAACGGTCTAACGACGATTTTC

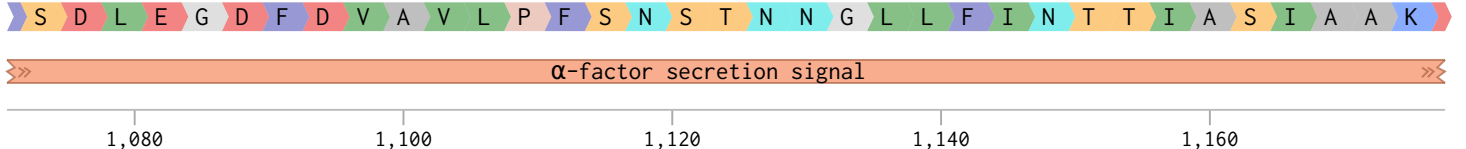

AAGAAGGGGTATCTCTCGAGAAAAGAGAGGCTGAAGCTTACGTAGAATTCATGCAGGTTCAATTGGTTGAATCTGGTGGTGCCTTGTTCACCTGGAGGATCACTA  
TTCTTCCCATAGAGAGCTCTTTTCTCTCCGACTTCGAATGCATCTTAAGTACGTCCAAGTTAACCAACTTAGACCACCACGGGAACAAGTTGGACCTCTAGTGAT

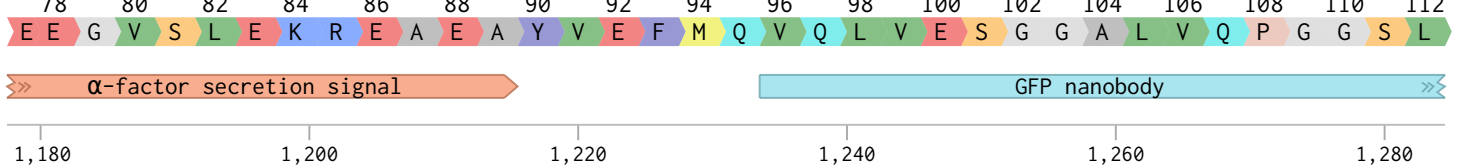

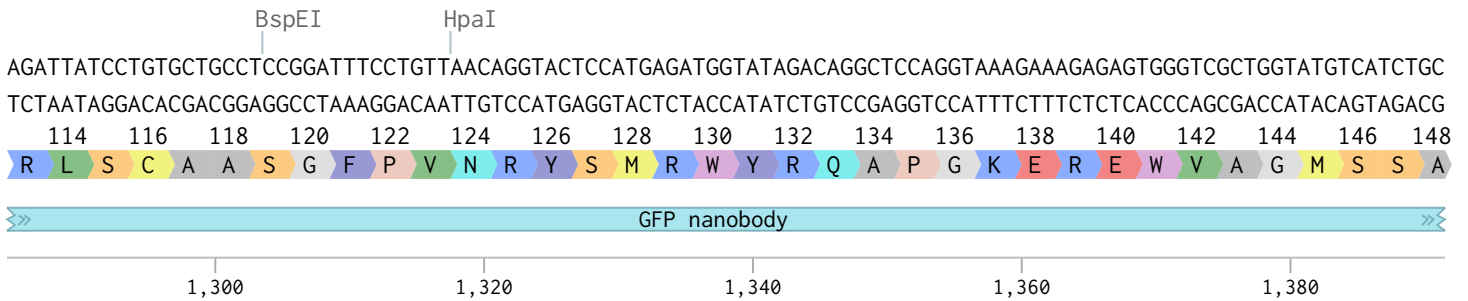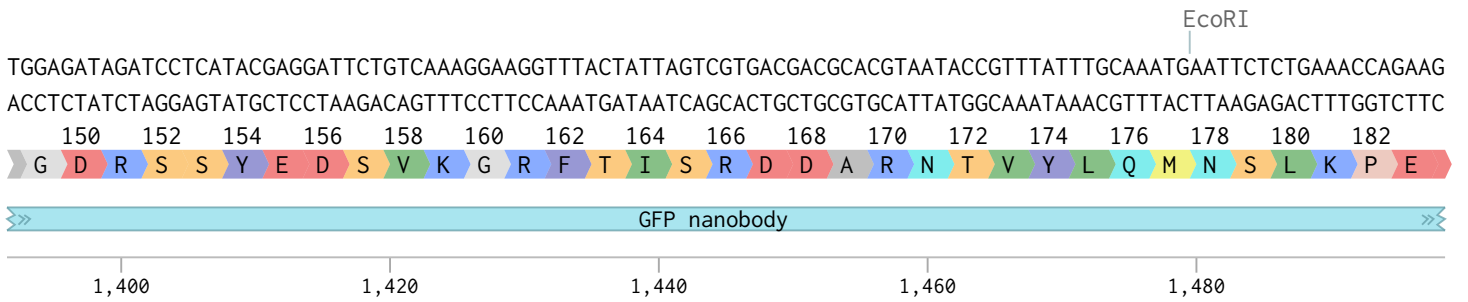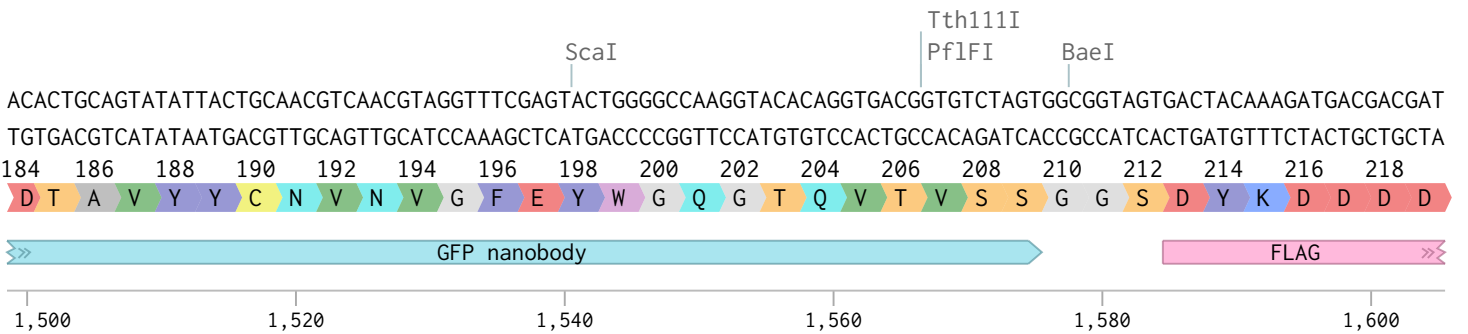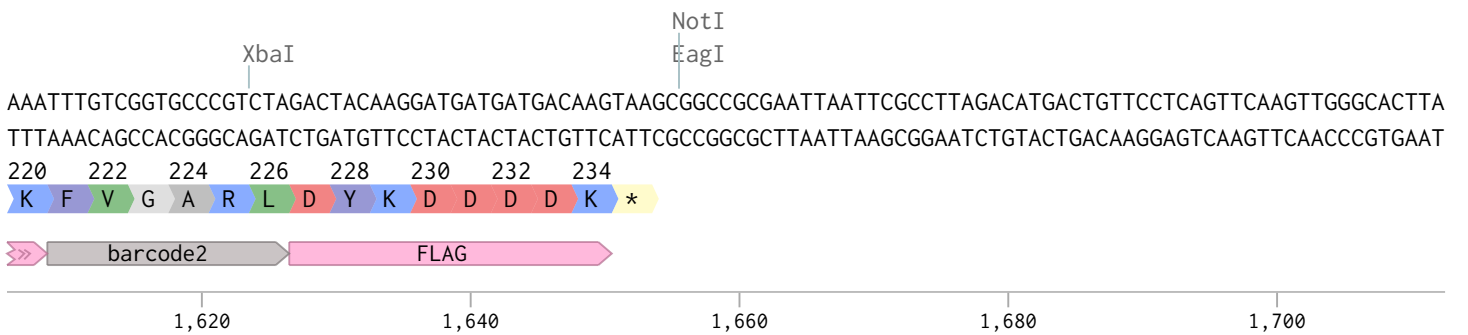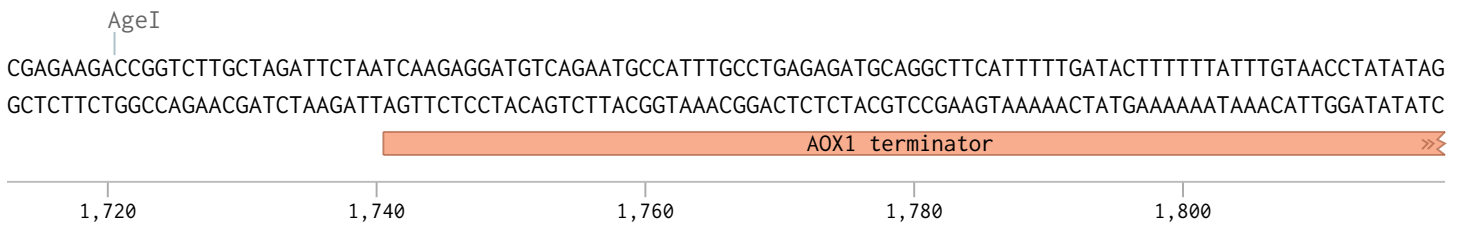

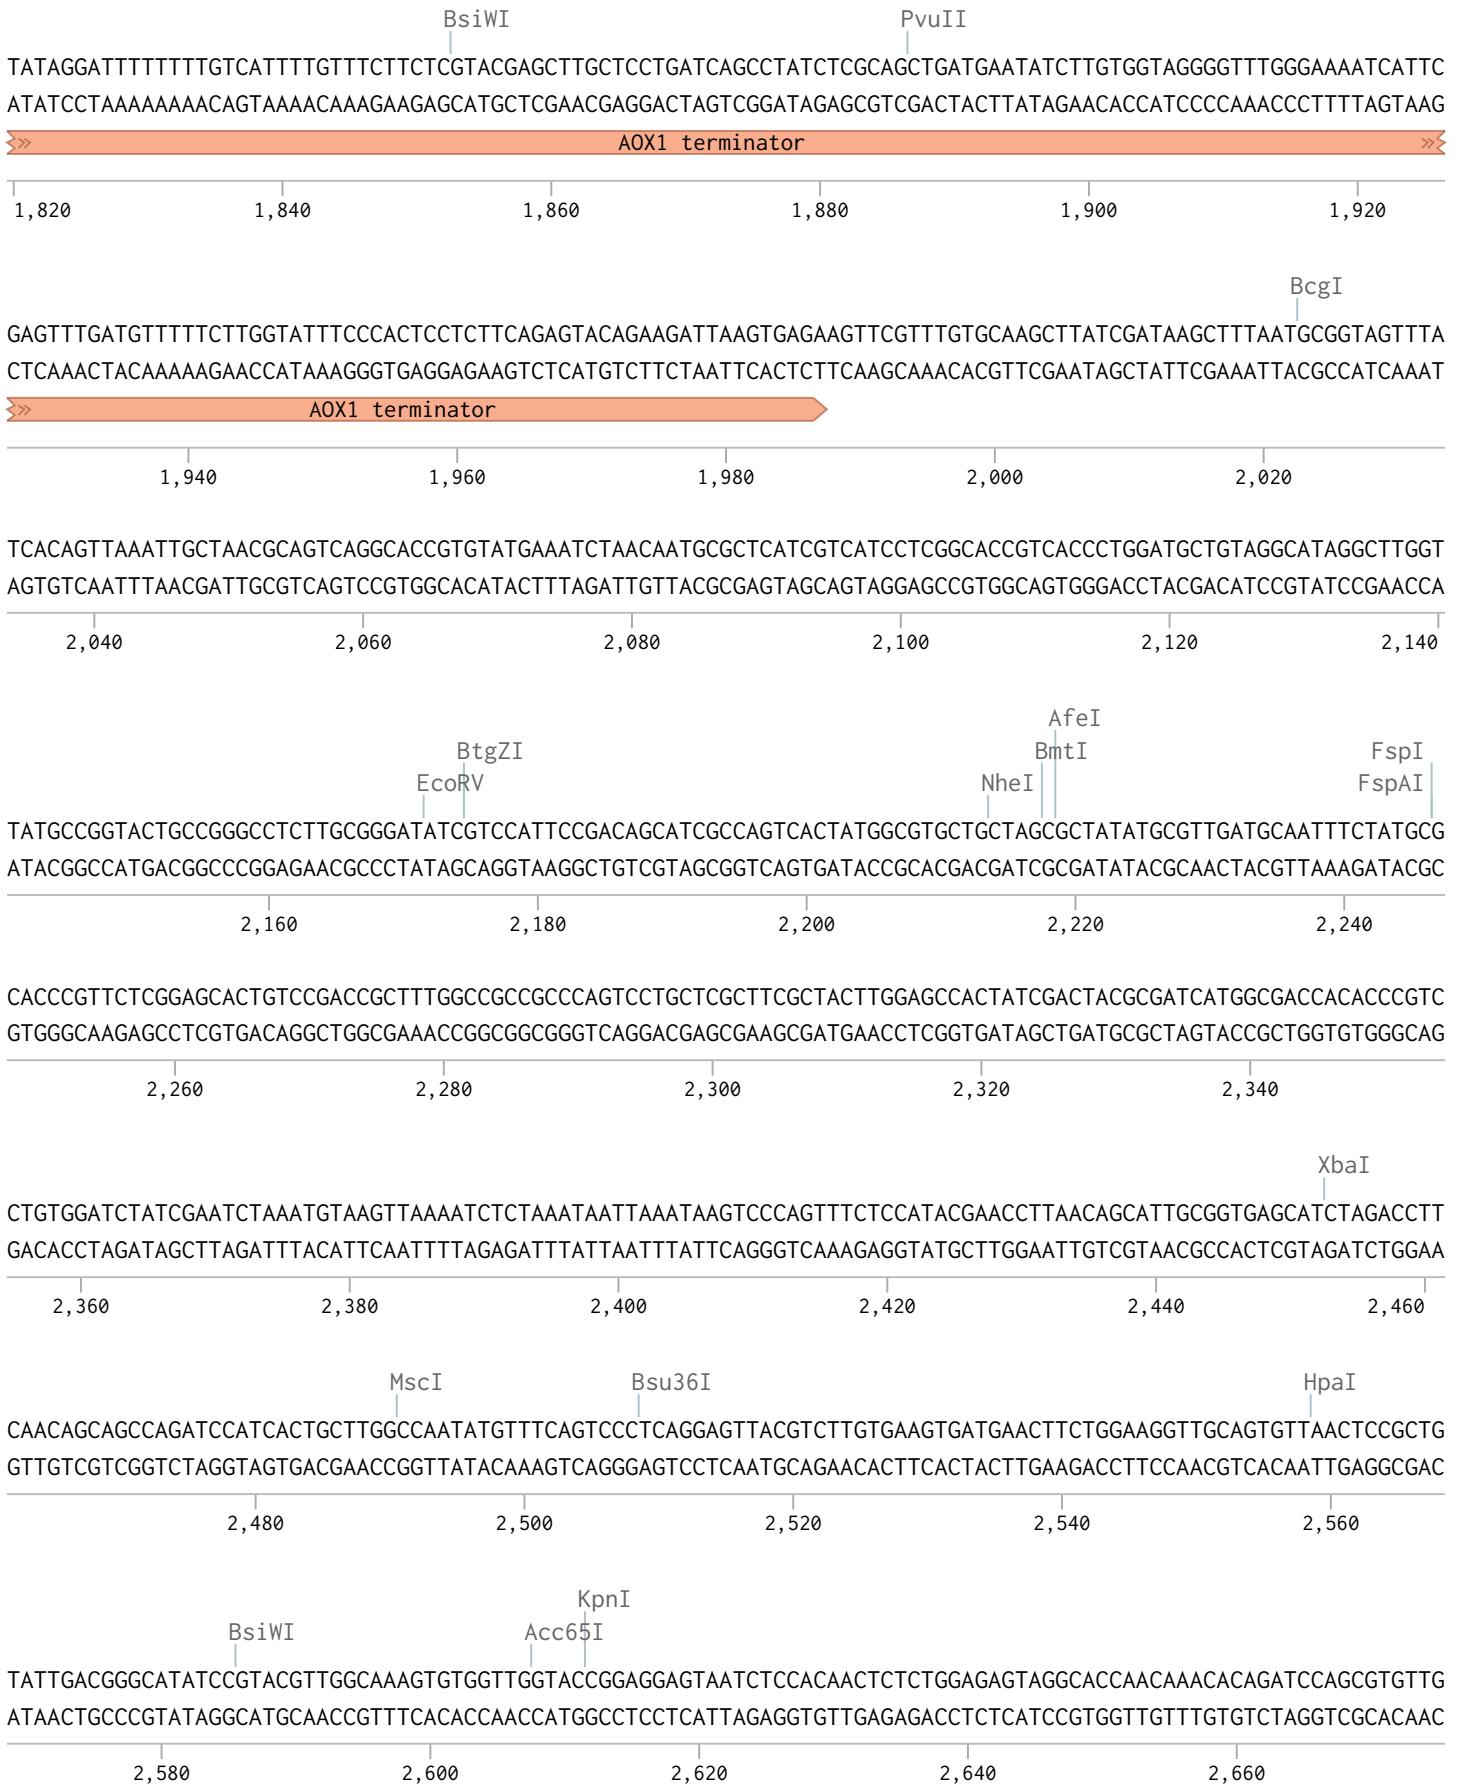

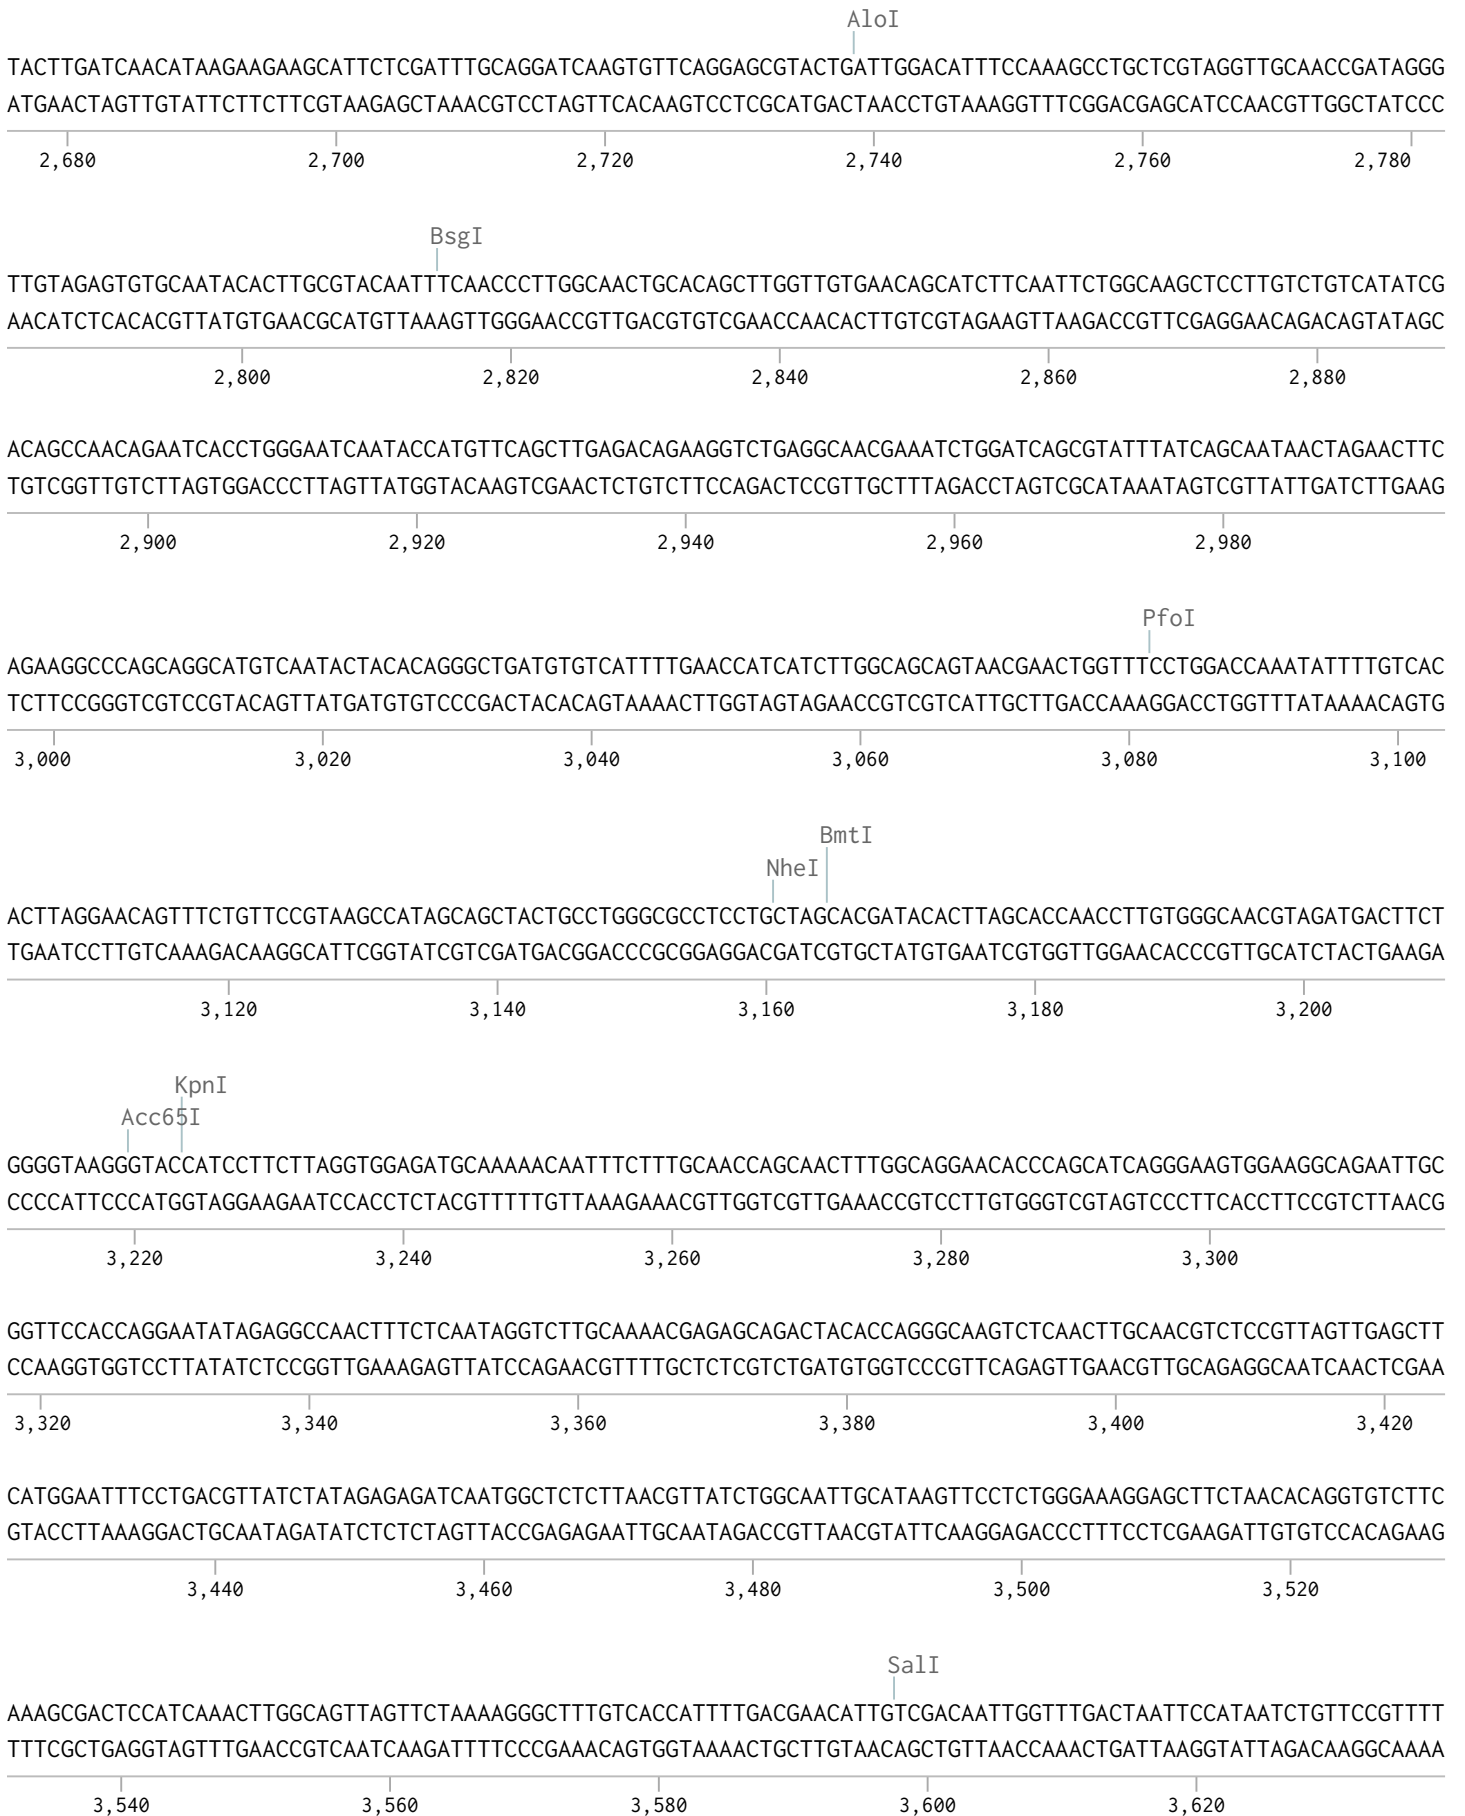



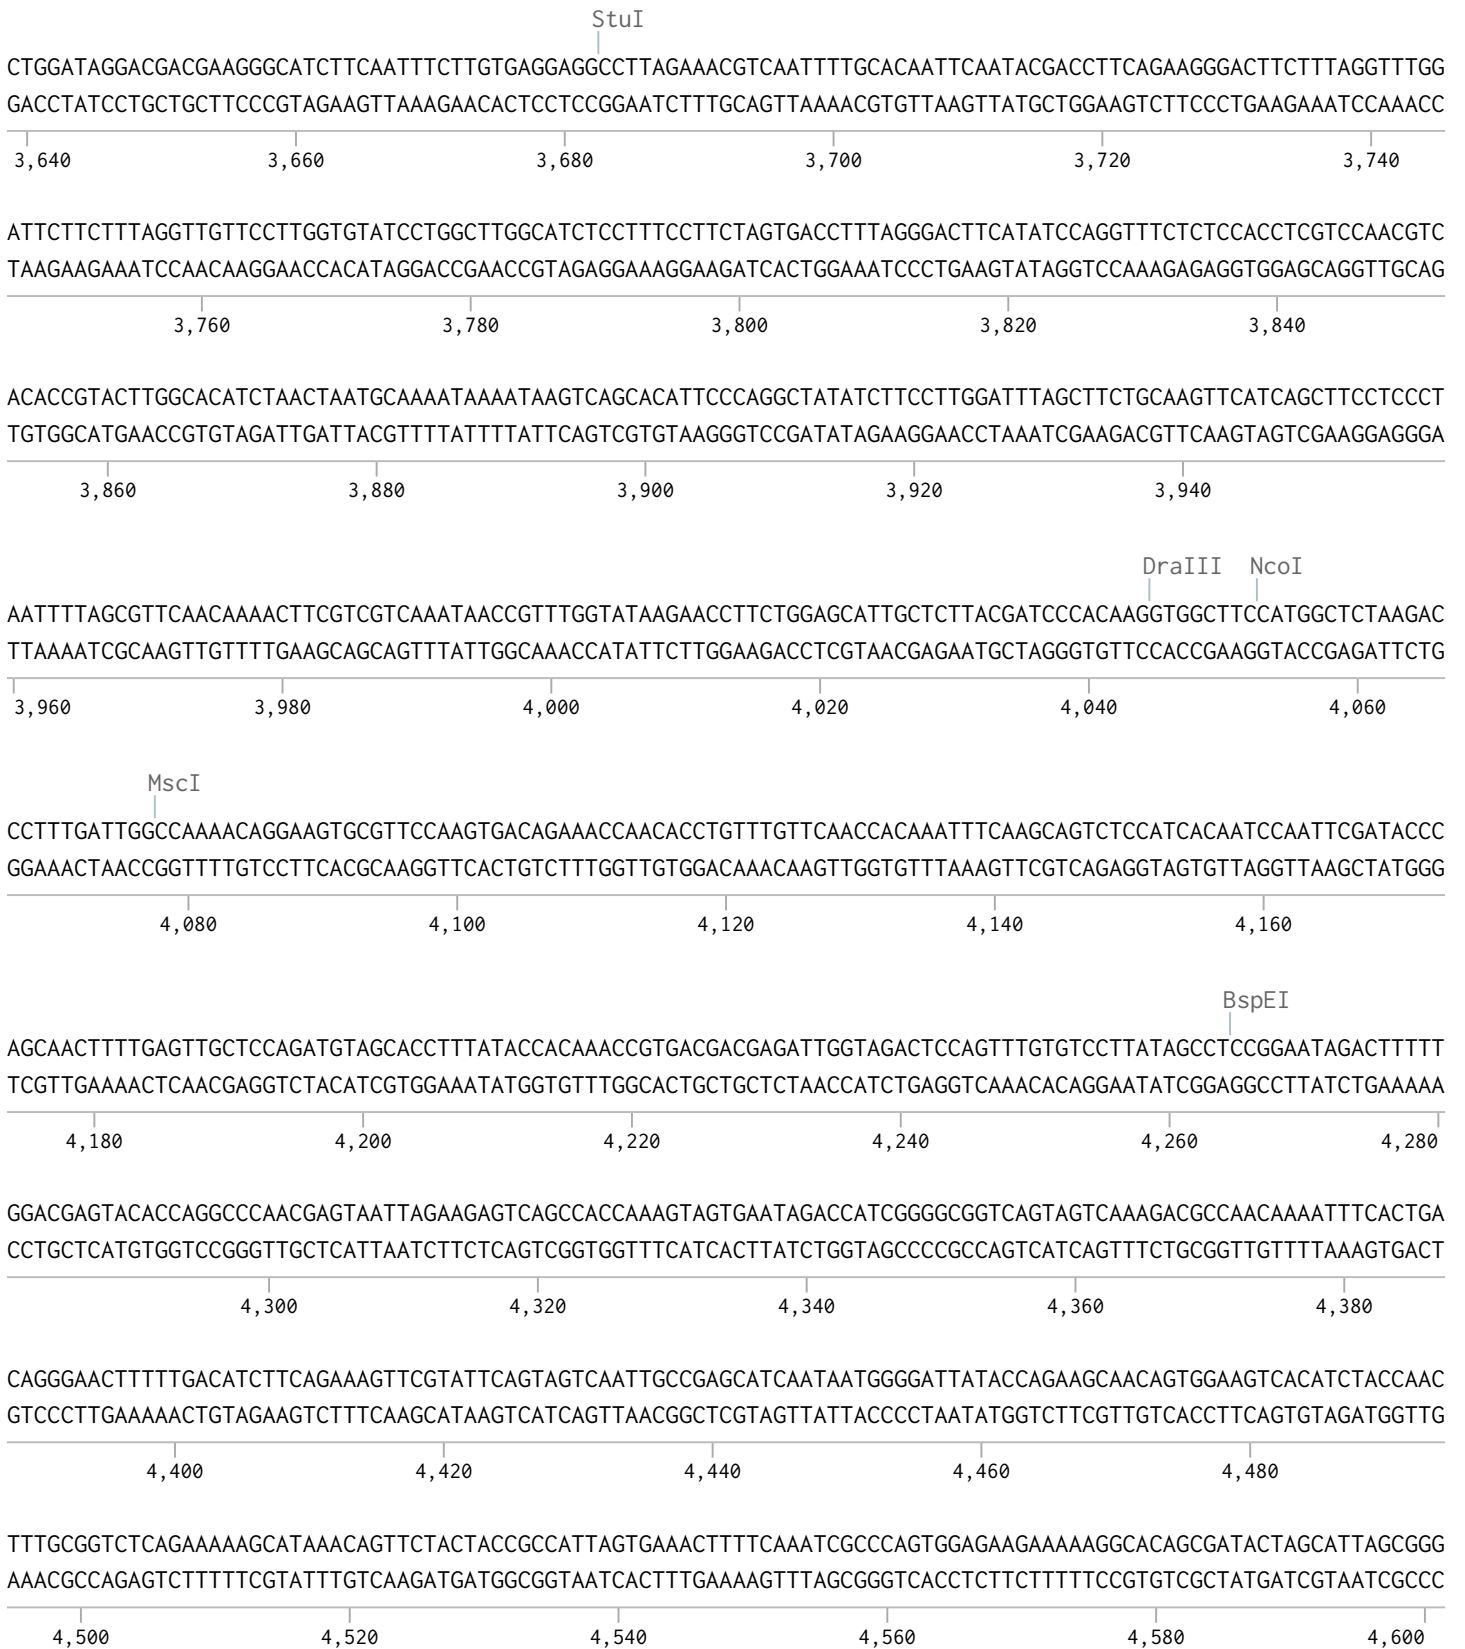

PpuMI  
 CAAGGATGCAACTTTATCAACCAGGGTCTATAGATAACCCTAGCGCCTGGGATCATCCTTTGGACAACCTTTCTGCCAAATCTAGGTCCAAAATCACTTCATTGA  
 GTTCTACGTTGAAATAGTTGGTCCCAGGATATCTATTGGGATCGCGGACCCTAGTAGGAAACCTGTTGAGAAAAGACGGTTTAGATCCAGGTTTTAGTGAAGTAACT

4,620 4,640 4,660 4,680 4,700

BsrGI  
 TACCATTATTGTACAACCTTGAGCAAGTTGTCGATCAGCTCCTCAAATTTGGTCCTCTGTAACGGATGACTCAACTTGACATTAACCTGAAGCTCAGTCGATTGAGTG  
 ATGGTAATAACATGTTGAACTCGTTCAACAGCTAGTCGAGGAGTTTAAACCAGGAGACATTGCCTACTGAGTTGAACGTGTAATTGAACTTCGAGTCAGCTAACTCAC

4,720 4,740 4,760 4,780 4,800

PvuII BsgI  
 AACTTGATCAGGTTGTGCGACTGGTCAGCAGCATAGGGAAACACGGCTTTTCTACCAAACCTCAAGGAATTATCAAACCTGCAACACTTGCGTATGCAGGTAGCAA  
 TTGAACTAGTCCAACACGTCGACCAGTCGTCGTATCCCTTTGTGCCGAAAAGGATGGTTTGAGTTCCTTAATAGTTTGAGACGTTGTGAACGCATACGTCCATCGTT

4,820 4,840 4,860 4,880 4,900 4,920

GGGAAATGCATACTTGAAGTCGGACAGTGAGTGTAGTCTTGAGAAATTTGAAGCCGATTTTTATTATCAGTGAGTCAGTCATCAGGAGATCCTCTACGCCGGAC  
 CCCTTTACAGTATGAACTTCAGCCTGTCACTCACATCAGAACTCTTAAAGACTTCGGCATAAAAAATAATAGTCACTCAGTCAGTAGTCCTCTAGGAGATGCGGCCTG

4,940 4,960 4,980 5,000 5,020

SbfI Bpu10I BbvCI StuI  
 GCATCGTGGCCGACCTGCAGGGGGGGGGGGGCGCTGAGGTCTGCCTCGTGAAGAAGGTGTTGCTGACTCATACCAGGCCTGAATCGCCCCATCATCCAGCCAGAAA  
 CGTAGCACCGGCTGGACGTCCCCCCCCCCCCGCGACTCCAGACGGAGCACTTCTCCACAACGACTGAGTATGGTCCGGACTTAGCGGGTAGTAGGTGGTCTTT

5,040 5,060 5,080 5,100 5,120

GTGAGGGAGCCACGGTTGATGAGAGCTTTGTTGTAGGTGGACCAGTTGGTGATTTTGAACTTTTGCTTTGCCACGGAACGGTCTGCGTTGTCGGAAGATGCGTGAT  
 CACTCCCTCGGTGCCAACTACTCTCGAAACAACATCCACCTGGTCAACCACTAAAACCTGAAAACGAAACGGTGCCTTGCCAGACGCAACAGCCCTTCTACGCACTA

5,140 5,160 5,180 5,200 5,220 5,240

CTGATCCTTCAACTCAGCAAAAGTTCGATTTATTCAACAAAGCCCGTCCCCTCAAGTCAGCGTAATGCTCTGCCAGTGTTACAACCAATTAACCAATTCTGATTA  
 GACTAGGAAGTTGAGTCGTTTTCAAGCTAAATAAGTTGTTTCGGCGCAGGGCAGTTCAGTCGCATTACGAGACGGTCACAATGTTGGTTAATTGGTTAAGACTAAT

5,260 5,280 5,300 5,320 5,340

GAAAACTCATCGAGCATCAAATGAACTGCAATTTATTCATATCAGGATTATCAATACCATATTTTTGAAAAAGCCGTTTCTGTAATGAAGGAGAAAACTCACCGA  
 CTTTTGAGTAGCTCGTAGTTTACTTTGACGTTAAATAAGTATAGTCCTAATAGTTATGGTATAAAAACTTTTTCGGCAAAGACATTACTTCTCTTTGAGTGGCT

5,360 5,380 5,400 5,420 5,440

GGCAGTTCCATAGGATGGCAAGATCCTGGTATCGGTCTGCGATTCCGACTCGTCCAACATCAATACAACCTATTAATTTCCCTCGTCAAAAAAAGGTTATCAAGT  
 CCGTCAAGGTATCCTACCGTTCTAGGACCATAGCCAGACGTAAGGCTGAGCAGGTTGTAGTTATGTTGGATAATTAAGGGGAGCAGTTTTTATTCCAATAGTTCA

5,460 5,480 5,500 5,520 5,540 5,560

GAGAAATCACCATGAGTGACGACTGAATCCGGTGAAGTGGCAAAAGCTTATGCATTTCTTTCCAGACTTGTCAACAGGCCAGCCATTACGCTCGTCATCAAATC  
 CTCTTAGTGGTACTACTGCTGACTTAGGCCACTTACCCTTTTCGAATACGTAAGAAAGGTTCTGAACAAGTTGTCGGTCCGGTAATGCGAGCAGTAGTTTTAG

5,580 5,600 5,620 5,640 5,660

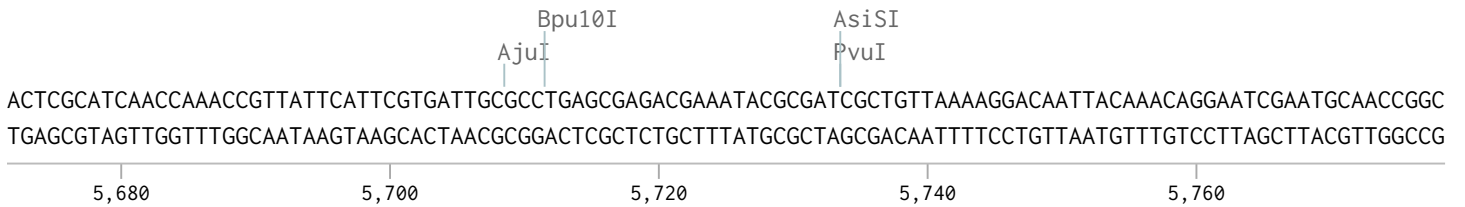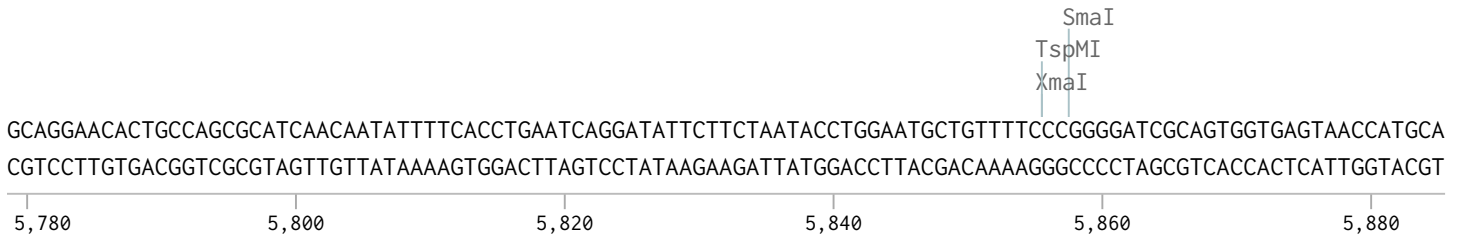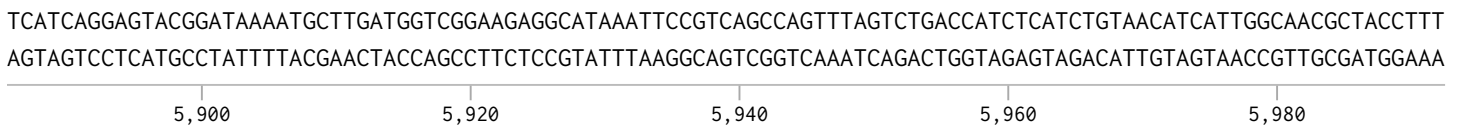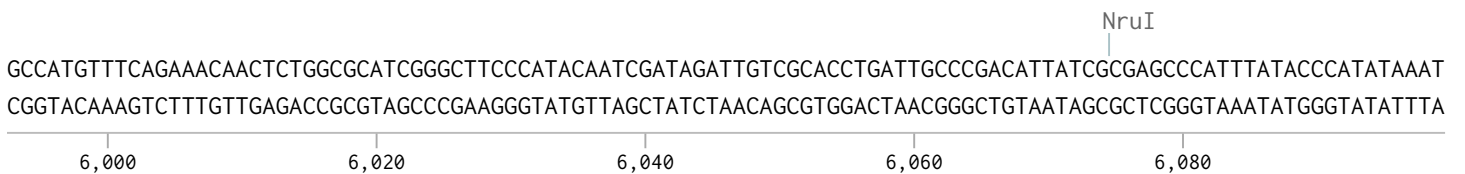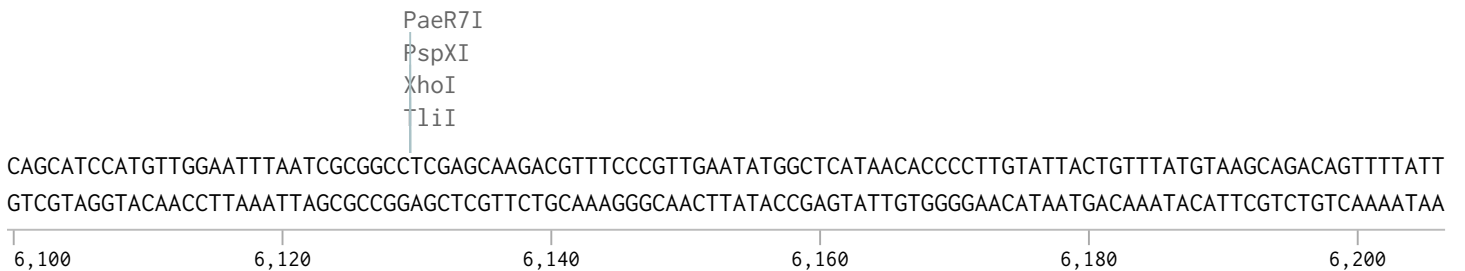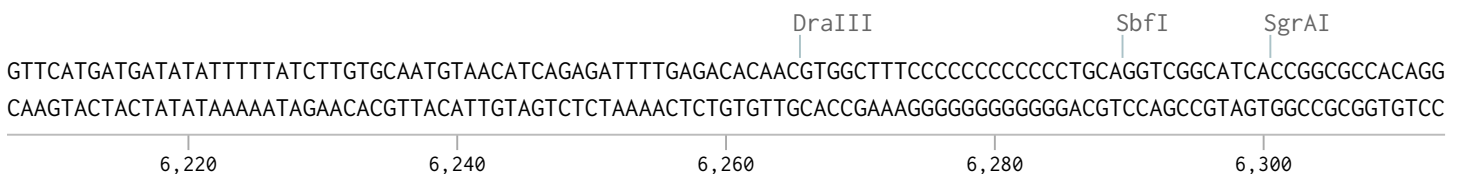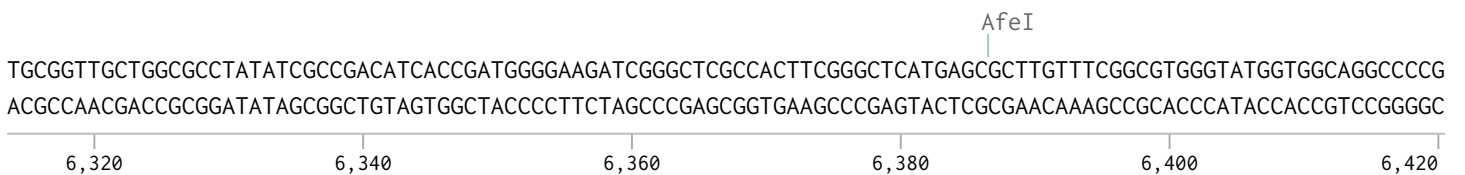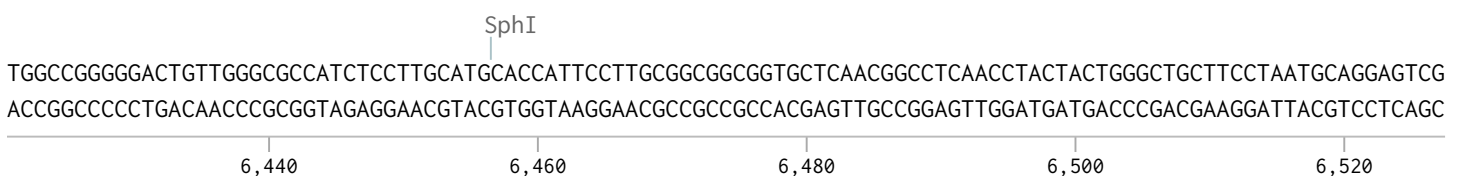

CATAAGGGAGAGCGTCGAGTATCTATGATTGGAAGTATGGGAATGGTGATACCCGCATTCTTCAGTGTCTTGAGGTCTCTATCAGATTATGCCAACTAAAGCAAC  
GTATTCCTCTCGCAGCTCATAGATACTAACCTTCATACCTTACCCTATGGGCGTAAGAAGTCACAGAAGTCCAGAGGATAGTCTAATACGGGTTGATTCGTTG

6,540

6,560

6,580

6,600

6,620

CGGAGGAGGAGATTCATGGTAAATTTCTGACTTTTGGTCATCAGTAGACTCGAACTGTGAGACTATCTCGGTTATGACAGCAGAAATGTCCTTCTGGAGACAG  
GCCTCTCTCTAAAGTACCATTTAAAGAGACTGAAAACAGTAGTCATCTGAGCTTGACACTCTGATAGAGCCAATACTGTCGTCTTTACAGGAAGAAGCTCTGTG

6,640

6,660

6,680

6,700

6,720

6,740

BstBI

TAAATGAAGTCCCACCAATAAAGAAATCCTTGTTATCAGGAACAACTTCTTGTTTTCGAACTTTTTCGGTGCCTTGAAGTATAAAATGTAGAGTGGATATGTCGGGT  
ATTTACTTCAGGTGGTTATTTCTTTAGGAACAATAGTCTTGTTTGAAGAACAAGCTTGAAAAAGCCACGGAAGTGGATATTTACATCTCACCTATACAGCCCA

6,760

6,780

6,800

6,820

6,840

AGGAATGGAGCGGGCAAATGCTTACCTTCTGGACCTTCAAGAGGTATGTAGGGTTTGTAGATACTGATGCCAACTTCAAGTACAACTTCAAGTATTTTCGTTCAAACCA  
TCCTTACCTCGCCGTTTACGAATGGAAGACCTGGAAGTCTCCATACATCCCAAACATCTATGACTACGGTTGAAGTCACTGTTGCAACGATAAAGCAAGTTTGGT

6,860

6,880

6,900

6,920

6,940

TTCCGAATCCAGAGAAATCAAAGTTGTTGTCTACTATTGATCCAAGCCAGTCCGGTCTTGAAACTGACAATAGTGTCTCGTGTGTTTGTAGGTCATCTTTGTATGAA  
AAGCTTAGGTCTCTTTAGTTTCAACAAACAGATGATAACTAGGTTCCGGTACGCCAGAAGTCTGACTGTTATCACACGAGCACAAAAGTCCAGTAGAAACATACTT

6,960

6,980

7,000

7,020

7,040

7,060

TAAATCTAGTCTTTGATCTAAATAATCTTGACGAGCCAAGGCGATAAATACCCAAATCTAAAAGTCTTTTAAAAGGACAAGTATGTCTGCCTGTATTAA  
ATTTAGATCAGAACTAGATTTATTAGAACTGCTCGGTTCCGCTATTTATGGGTTTAGATTTTGAAGAAATTTGCAATTTTCTGTTTCATACAGACGGACATAATT

7,080

7,100

7,120

7,140

7,160

ACCCCAAATCAGCTCGTAGTCTGATCCTCATCAACTTGAGGGGCACTATCTTGTTTTAGAGAAATTTGCGGAGATGCGATATCGAGAAAAAGGTACGCTGATTTTAA  
TGGGGTTTAGTCGAGCATCAGACTAGGAGTAGTTGAACTCCCGTGATAGAACAAAATCTCTTTAAACGCCTCTACGCTATAGCTCTTTTTCCATGCGACTAAAAT

7,180

7,200

7,220

7,240

7,260

EcoRV

BglIII

PfoI

ACGTGAAATTTATCTCAAGATCTCTGCCTCGCGGTTTTCGGTGATGACGGTGAAAACCTCTGACACATGCAGCTCCCGGAGACGGTCACAGCTTGTCTGTAAGCGGA  
TGCACTTTAAATAGAGTTCTAGAGACGGAGCGCGCAAGCCACTACTGCCACTTTTGGAGACTGTGTACGTGCGAGGGCCTCTGCCAGTGTGCAACAGACATTCGCCT

7,280

7,300

7,320

7,340

7,360

7,380

TGCCGGGAGCAGACAAGCCCGTCAGGGCGGTCAGCGGGTGTGGCGGGTGTGCGGGCGCAGCCATGACCCAGTCACGTAGCGATAGCGGAGTGTATACTGGCTTAA  
ACGGCCCTCGTCTGTTGCGGCAGTCCCGCGCAGTCGCCACAACCGCCACAGCCCGCGTGGTACTGGGTGAGTGCATCGCTATCGCCTCACATATGACCGAATT

7,400

7,420

7,440

7,460

7,480

Tth111I

PflFI

BstZ17I

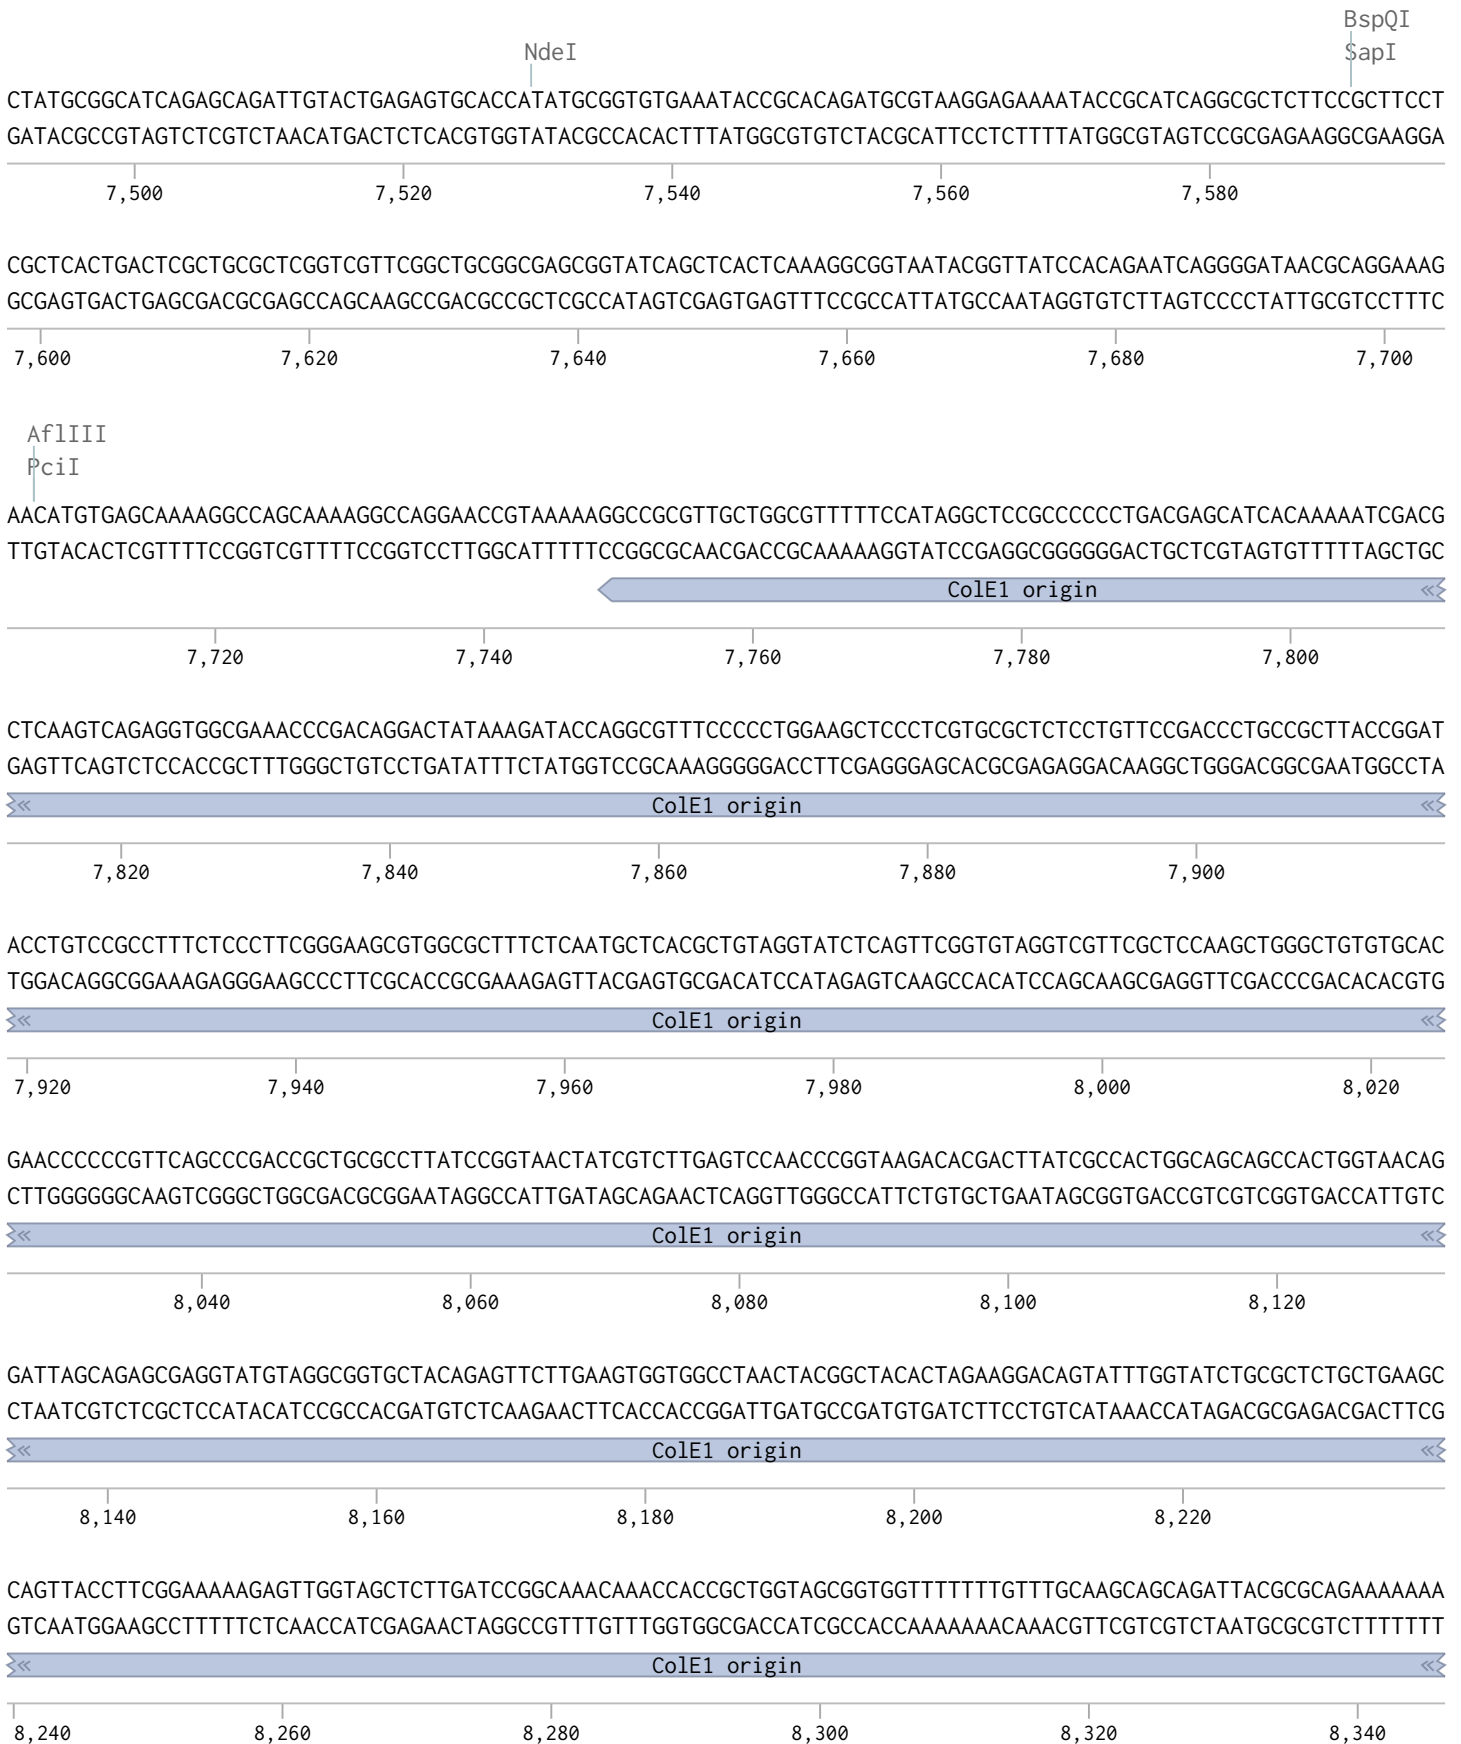

GGATCTCAAGAAGATCCTTTGATCTTTTCTACGGGGTCTGACGCTCAGTGGAAACGAAAACACACGTTAAGGGATTTTGGTCATGAGATTATCAAAAAGGATCTTCAC  
CCTAGAGTTCTTCTAGGAACTAGAAAAGATGCCCCAGACTGCGAGTACCTTGCTTTTGGAGTCAATTCCCTAAAACAGTACTCTAATAGTTTTCTAGAAAGTG

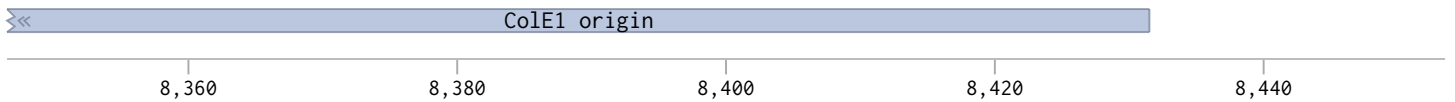

CTAGATCCTTTTAAATTAATAAATGAAGTTTTAAATCAATCTAAAGTATATATGAGTAACTTGGTCTGACAGTTACCAATGCTTAATCAGTGAAGCACCTATCTCAG  
GATCTAGGAAAATTTAATTTTTACTTCAAATTTAGTTAGATTTTCATATATACTCATTGAACCAGACTGTCAATGGTTACGAATTAGTCACTCCGTGGATAGAGTC

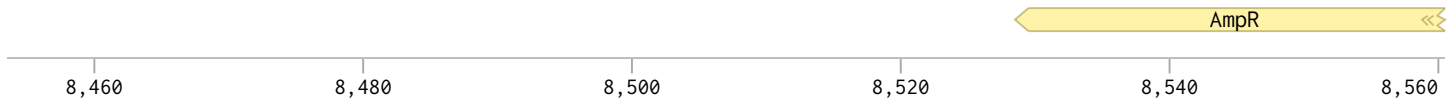

CGATCTGTCTATTTCTGTTTCATCCATAGTTGCCTGACTCCCCGTCTGTAGATAACTACGATACGGGAGGGCTTACCATCTGGCCCCAGTGTGCAATGATACCGCGA  
GCTAGACAGATAAAGCAAGTAGGTATCAACGGACTGAGGGGACACATCTATTGATGCTATGCCCTCCGAATGGTAGACGGGGTACGACGTTACTATGGCGCT

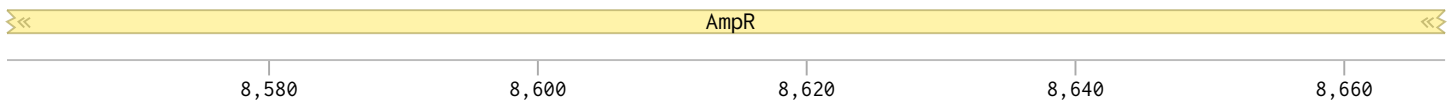

GACCCACGCTCACGGCTCCAGATTTATCAGCAATAAACAGCCAGCCGGAAGGGCCGAGCGCAGAAGTGGTCTGCAACTTTATCCGCTCCATCCAGTCTATTAA  
CTGGTGCGAGTGGCCGAGGTCTAAATAGTCGTTATTTGGTCGGTCCGCTTCCCGGCTCGCGTCTTACCAGGACGTTGAAATAGCGGAGGTAGGTCAGATAAAT

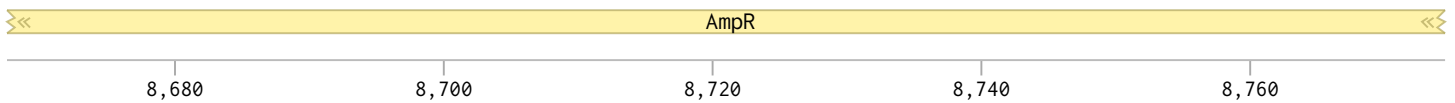

TTGTTGCCGGAAGCTAGAGTAAGTAGTTCGCCAGTTAATAGTTTGCACAACGTTGTTGCCATTGCTGCAGGCATCGTGGTGTACGCTCGTTCGTTTGGTATGGCTT  
AACAAACGGCCCTTCGATCTCATTTCATCAAGCGGTCAATTATCAAACGCGTTGCAACAACGGTAACGACGTCCTAGCACCACAGTGCAGCAGCAAACCATACCGAA

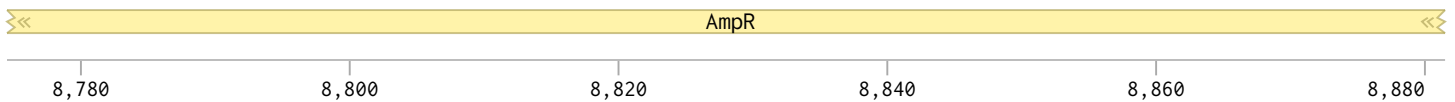

CATTCAGCTCCGTTCCCAACGATCAAGGCGAGTTACATGATCCCCATGTTGTGCAAAAAGCGGTTAGCTCCTTCGGTCTCCGATCGTTGTCAGAAGTAAGTTG  
GTAAGTCGAGCCAAGGTTGCTAGTTCCGCTCAATGTACTAGGGGTACAACAGTTTTTTCGCAATCGAGGAAGCCAGGAGGCTAGCAACAGTCTTCATTCAAC

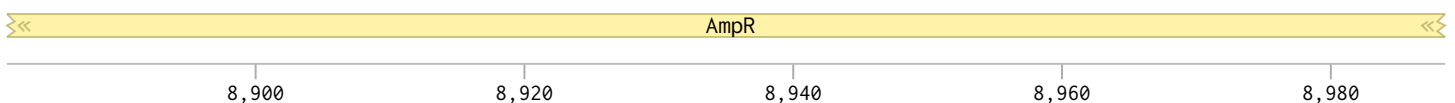

GCCGAGTGTATCACTCATGGTTATGGCAGCACTGCATAATTCTTCTACTGTCATGCCATCCGTAAGATGCTTTTCTGTGACTGGTGAGTACTCAACCAAGTCATT  
CGCGTCACAATAGTGAGTACCAATACCGTCGTGACGTATTAAGAGAATGACAGTACGGTAGGCATTCTACGAAAAGACACTGACCACTCATGAGTTGGTTAGTAA

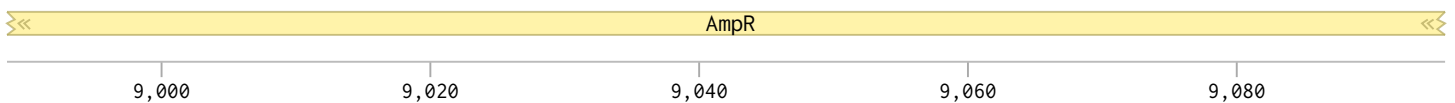

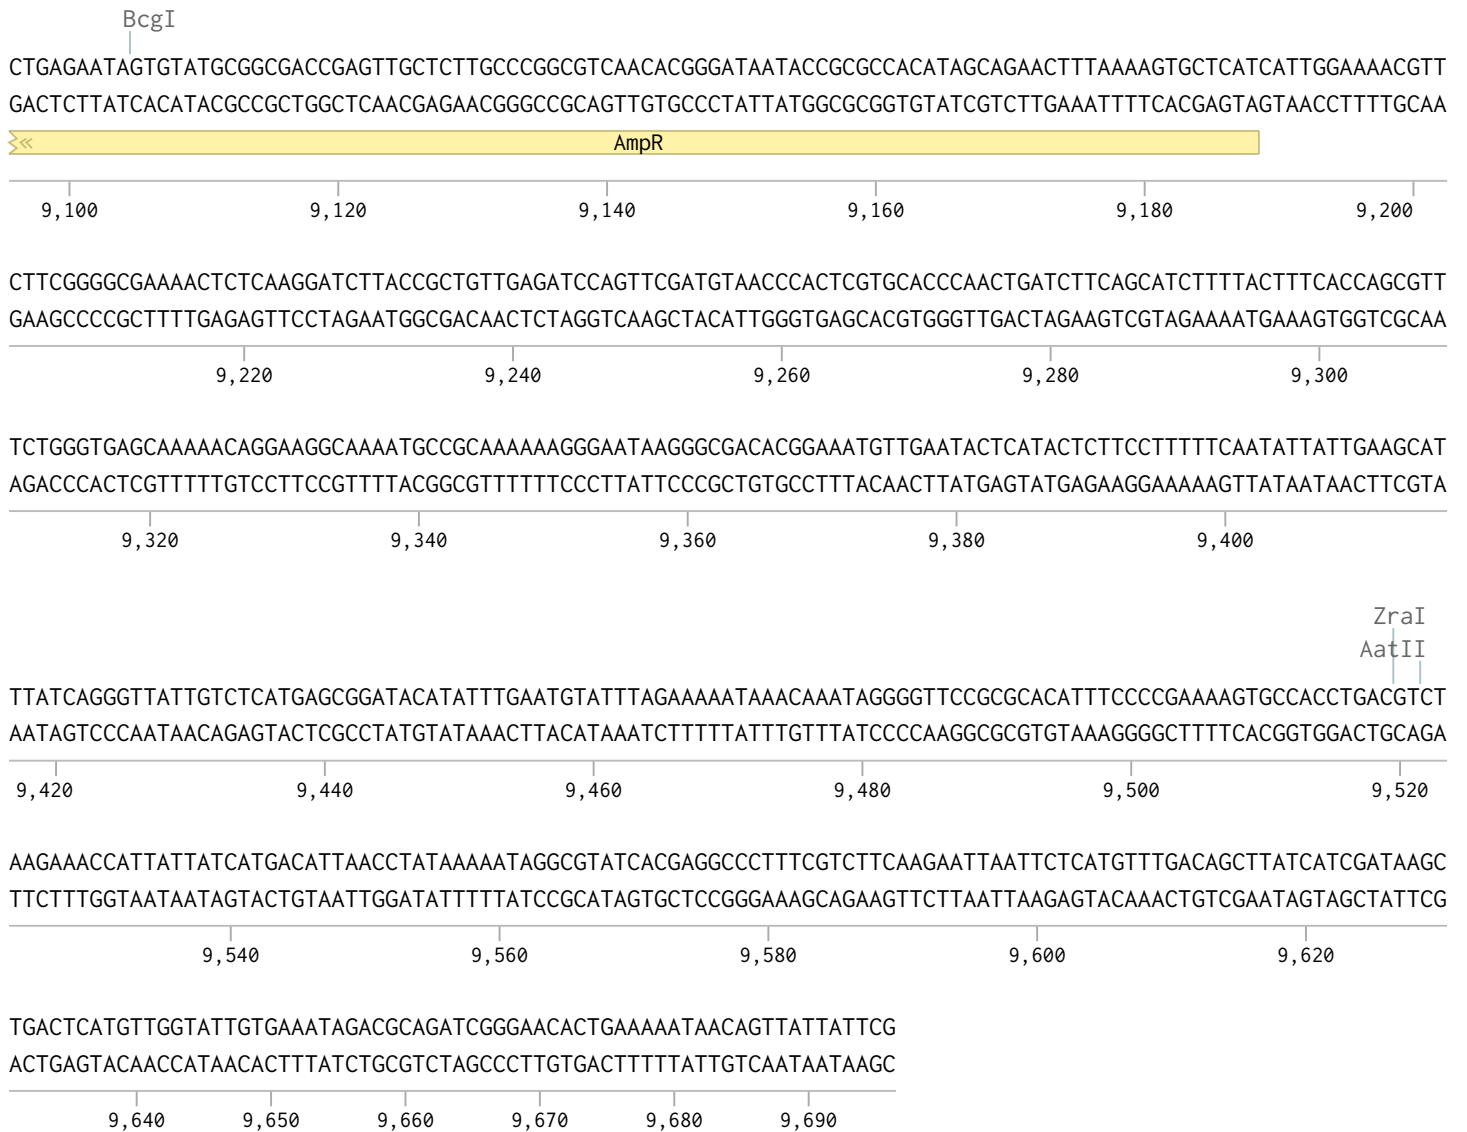

Supplement: pone.0215993.s001.pdf [file pone.0215993.s001.pdf]
